# Supplementary material for: Influence of Leaf Age on the Scaling Relationships of Lamina Mass vs. Area
Source: Front Plant Sci. 2022 Apr 8;13:860206. doi: 10.3389/fpls.2022.860206 (PMC9024345; doi:10.3389/fpls.2022.860206)
Supplement: Supplementary file 1 [file Data_Sheet_1.xlsx]

## Sheet: TABLE S1
TABLE S1 | Raw leaf data of Photinia × fraseri ‘Red Robin’
Date	Image	Group	LFM	LDM	PFM	PDM	PL	n1	n2	n	Mean	Var	upper.area	lower.area	SI	AR	scan.length	scan.width	scan.area	scan.perimeter
2021-03-22	0-001	O3	0.519	0.2386				2499	2324	4979	0.00370182	3.44e-06	13.2105	9.5093	0.239522	1.38922	9.9286	3.61951	22.7198	22.0969
2021-03-22	0-002	O3	0.5883	0.2694				2431	2388	4985	0.000870937	1.97e-07	12.5408	11.721	0.0447789	1.06993	10.1982	3.70772	24.2618	22.7582
2021-03-22	0-003	O3	0.8667	0.4116				2518	2400	4976	0.00199156	1.05e-06	13.1673	14.8378	0.114584	0.887417	10.5241	4.08212	28.0051	23.4668
2021-03-22	0-004	O3	0.4177	0.1869				2562	2301	4985	0.000760105	1.78e-07	9.4274	10.1566	0.0577361	0.928208	9.00729	3.27526	19.584	20.4424
2021-03-22	0-005	O3	0.495	0.219				2491	2463	4983	0.00233782	2.37e-06	9.53489	11.724	0.16138	0.813276	8.86784	3.61771	21.2589	20.137
2021-03-22	0-006	O3	0.2509	0.1221				2232	2163	4492	0.00108166	3.92e-07	4.17864	5.25708	0.160393	0.79486	6.98621	2.28091	9.43573	15.1897
2021-03-22	0-007	O3	0.3684	0.1732				2551	2272	4985	0.00322158	7.71e-07	5.83136	9.05294	0.302212	0.64414	8.30464	2.85126	14.8843	18.3782
2021-03-22	0-008	O3	0.6292	0.2792				2608	2329	4942	0.00186197	9.02e-07	13.6764	11.9328	0.0883806	1.14612	10.2159	3.90674	25.6092	22.7625
2021-03-22	0-009	O3	0.5559	0.2657				2536	2440	4994	0.00183533	5.72e-07	12.1692	10.5039	0.100883	1.15855	9.89586	3.49425	22.6731	21.8317
2021-03-22	0-010	O3	0.8648	0.3958				2603	2350	4987	0.00156157	4.05e-07	15.4449	16.9121	0.0656959	0.913248	11.8117	4.1766	32.3571	26.2744
2021-03-22	0-011	O3	0.6326	0.2799				2508	2423	4975	0.00144074	5.21e-07	12.7139	13.9013	0.0812235	0.914584	10.7673	3.80445	26.6152	23.755
2021-03-22	0-012	O3	0.3139	0.1479				2361	2275	4783	0.00158523	4.7e-07	5.89864	7.40627	0.134213	0.796438	7.11127	2.79663	13.3049	16.188
2021-03-22	0-013	O3	0.7111	0.3317				2515	2421	4992	0.00172901	6.95e-07	11.5884	13.1293	0.0951108	0.882641	10.214	3.76711	24.7177	22.6363
2021-03-22	0-014	O3	0.5212	0.2462				2450	2414	4995	0.00159889	3.18e-07	8.99165	10.5894	0.102479	0.849116	9.11511	3.37455	19.5811	20.2465
2021-03-22	0-015	O3	0.4812	0.2041				2556	2368	4982	0.00185071	9.21e-07	10.6793	12.5126	0.0867673	0.853485	9.80757	3.62668	23.1918	21.7499
2021-03-22	0-016	O3	1.0056	0.4531				2598	2375	4995	0.0015614	4.2e-07	16.5478	18.1092	0.0978455	0.91378	12.2734	4.3067	34.657	27.3095
2021-03-22	0-017	O3	0.7206	0.3251				2533	2342	4958	0.00130356	4.91e-07	11.8444	12.9518	0.0656908	0.914499	9.63206	3.74265	24.7962	21.6856
2021-03-22	0-018	O3	0.7805	0.348				2495	2430	4979	0.000560459	1.57e-07	16.0545	15.8799	0.0374472	1.01099	11.3507	4.2337	31.9344	25.2607
2021-03-22	0-019	O3	0.398	0.1822				2404	2325	4979	0.00261334	1.08e-06	9.76052	7.15343	0.179008	1.36445	8.62291	3.14373	16.914	19.0628
2021-03-22	0-020	O3	0.9496	0.4522				2607	2313	4989	0.00296677	9.04e-07	15.4716	12.5049	0.127106	1.23724	10.4045	4.03604	27.9765	23.3613
2021-03-22	0-021	O3	0.4792	0.221				2461	2400	4979	0.000951744	1.81e-07	10.1506	9.23285	0.0577759	1.0994	9.06955	3.28829	19.3834	19.9902
2021-03-22	0-022	O3	0.4467	0.21				2556	2389	4979	0.00302653	1.5e-06	9.60997	6.58388	0.207069	1.45962	8.89239	2.88027	16.1938	19.4853
2021-03-22	0-023	O3	0.6159	0.2797				2525	2366	4967	0.00119392	3.61e-07	12.2374	11.0536	0.050523	1.1071	9.64556	3.5629	23.291	21.5882
2021-03-22	0-024	O3	0.6703	0.3145				2580	2384	4991	0.00240058	1.34e-06	11.8138	13.7786	0.164073	0.8574	10.246	3.75766	25.5924	22.8358
2021-03-22	0-025	O3	0.6308	0.2969				2525	2326	4991	0.000560212	1.13e-07	10.0149	10.4893	0.0555115	0.954772	9.4806	3.44145	20.5041	20.8459
2021-03-22	0-026	O3	0.5447	0.2498				2535	2398	4989	0.000527777	8.48e-08	10.6068	10.5336	0.0651162	1.00696	9.81159	3.42527	21.1404	21.5236
2021-03-22	0-027	O3	0.5719	0.2698				2559	2374	4974	0.00149076	9.81e-07	9.82548	11.1029	0.113626	0.884945	9.55822	3.3335	20.9284	21.0242
2021-03-22	0-028	O3	0.3871	0.1778				2551	2371	4976	0.000418981	1.02e-07	8.02526	8.03279	0.051685	0.999062	7.93568	3.14951	16.058	17.7775
2021-03-22	0-029	O3	0.3449	0.1664				2512	2227	4993	0.00170035	9.13e-07	8.52989	6.82954	0.155608	1.24897	8.34455	2.98704	15.3594	18.3044
2021-03-22	0-030	O3	0.2587	0.1165				2088	1998	4256	0.00045006	8.52e-08	5.56616	5.84256	0.0661252	0.952691	6.7468	2.59238	11.4087	14.9408
2021-03-22	0-031	O3	0.5313	0.2473				2510	2390	4993	0.00179417	4.31e-07	10.4066	8.85648	0.12642	1.17502	8.46605	3.45107	19.2631	19.2304
2021-03-22	0-032	O3	0.7543	0.333				2438	2419	4991	0.0063708	5.37e-06	12.6188	18.9756	0.247448	0.665001	11.6111	4.28455	31.5943	25.6998
2021-03-22	0-033	O3	0.5464	0.2525				2476	2393	4991	0.00124947	3.32e-07	10.1525	10.833	0.107919	0.93718	9.32824	3.45256	20.9855	20.6738
2021-03-22	0-034	O3	0.3492	0.1628				2588	2406	4994	0.00165391	4.89e-07	6.24252	7.89128	0.137797	0.791066	7.98697	2.75016	14.1338	17.5856
2021-03-22	0-035	O3	0.6383	0.2841				2521	2385	4980	0.00287203	3.29e-06	11.3986	14.2673	0.161897	0.798931	9.84033	4.14012	25.6659	22.977
2021-03-22	0-036	O3	0.5118	0.242				2520	2367	4973	0.000834279	1.89e-07	9.76022	9.55104	0.0929048	1.0219	8.21631	3.66496	19.3113	18.8525
2021-03-22	0-037	O3	0.461	0.213				2504	2354	4991	0.00287872	2.16e-06	8.7191	11.547	0.148395	0.755099	9.06155	3.52602	20.2661	20.1824
2021-03-22	0-038	O3	0.5591	0.2645				2593	2368	4983	0.000713316	1.69e-07	10.8391	11.1388	0.06291	0.973092	8.4469	3.70102	21.9778	19.4964
2021-03-22	0-039	O3	0.3857	0.1764				2533	2403	4984	0.00046268	2.01e-07	7.98546	8.27899	0.0709214	0.964545	8.21971	3.12922	16.2645	18.3548
2021-03-22	0-040	O3	0.4453	0.2014				2564	2301	4961	0.00444103	2.57e-06	10.0448	5.60382	0.331166	1.7925	8.74017	2.87454	15.6487	19.0495
2021-03-22	0-041	O3	0.4947	0.2184				2449	2352	4990	0.000986083	1.28e-07	11.3117	10.4362	0.0598884	1.08389	9.4225	3.36631	21.748	20.8943
2021-03-22	0-042	O3	0.4399	0.1978				2494	2460	4988	0.00068154	1.25e-07	10.3452	9.67242	0.0479708	1.06956	8.94765	3.45167	20.0177	20.2661
2021-03-22	0-043	O3	0.5398	0.2428				2384	2564	5002	0.00104846	3.27e-07	11.6613	11.0575	0.0893761	1.05461	9.3805	3.50199	22.7188	21.4552
2021-03-22	0-044	O3	0.6729	0.3181				2531	2388	4999	0.00358074	2.01e-06	14.5263	11.1378	0.169836	1.30424	10.7097	3.64083	25.6641	23.6453
2021-03-22	0-045	O3	0.519	0.2374				2552	2338	4990	0.00222368	7.09e-07	8.94136	11.0503	0.158619	0.809151	9.16673	3.335	19.9916	20.3084
2021-03-22	0-046	O3	0.5832	0.2607				2574	2342	4986	0.00384725	2.13e-06	14.2013	10.4511	0.197458	1.35883	10.959	3.63799	24.6525	23.8356
2021-03-22	0-047	O3	0.511	0.2332				2545	2434	4992	0.0033996	9.79e-07	10.1088	13.5083	0.185	0.74834	9.70016	3.65961	23.6171	21.6571
2021-03-22	0-048	O3	0.2797	0.1194				2379	2241	4767	0.000605198	6.96e-08	6.67469	6.07812	0.0601601	1.09815	7.38504	2.60714	12.7528	16.2821
2021-03-22	0-049	O3	0.3745	0.1731				2457	2273	4790	0.00088505	1.93e-07	6.93604	7.24085	0.101968	0.957903	7.26546	2.96923	14.1769	16.4996
2021-03-22	0-050	O3	0.4491	0.2047				2566	2315	4977	0.000690832	2.66e-07	8.92043	8.23584	0.0597017	1.08312	8.46404	3.04346	17.1563	18.7116
2021-03-22	0-051	O3	0.5526	0.25				2555	2421	4986	0.00218015	9.62e-07	12.6301	10.5454	0.121503	1.19769	9.61005	3.48899	23.1755	21.3252
2021-03-22	0-052	O3	0.4515	0.2029				2533	2438	4999	0.000863522	3.46e-07	10.9277	10.2366	0.0472427	1.06751	9.13512	3.53654	21.1643	20.9305
2021-03-22	0-053	O3	0.4783	0.2152				2487	2396	4993	0.00040685	8.37e-08	10.0181	10.1483	0.0367785	0.987173	9.17403	3.3534	20.1664	20.1802
2021-03-22	0-054	O3	0.4956	0.2344				2450	2440	4991	0.00123415	1.51e-07	9.04166	10.2757	0.10726	0.879905	8.24281	3.52081	19.3174	18.7027
2021-03-22	0-055	O3	0.3683	0.1712				2533	2420	4981	0.000307644	5.23e-08	7.23529	7.11859	0.0618845	1.01639	7.84676	2.80741	14.3539	17.3556
2021-03-22	0-056	O3	0.449	0.1992				2502	2446	4960	0.00214749	4.32e-07	8.55316	10.6892	0.146559	0.800168	8.97319	3.25357	19.2424	19.7726
2021-03-22	0-057	O3	0.4124	0.2				2474	2299	4978	0.000483513	2.2e-07	8.14511	8.45091	0.0422584	0.963814	8.319	3.15048	16.596	18.4288
2021-03-22	0-058	O3	0.6408	0.2833				2548	2348	4986	0.00234906	8.1e-07	11.5542	13.8715	0.110603	0.832943	10.5939	3.5394	25.4257	23.2154
2021-03-22	0-059	O3	0.7115	0.3314				2560	2409	4984	0.00161271	8.35e-07	13.3166	11.7095	0.0757072	1.13725	10.2099	3.87733	25.0261	22.6029
2021-03-22	0-060	O3	0.846	0.4097				2610	2348	4981	0.00173922	8.09e-07	11.2833	12.8789	0.1083	0.876105	10.0287	3.73704	24.1622	22.5557
2021-03-22	0-061	O3	0.8258	0.386				2550	2395	4996	0.00220492	5.49e-07	15.947	13.7477	0.0994281	1.15997	11.1292	4.06011	29.6947	24.8047
2021-03-22	0-062	O3	0.4596	0.2202				2481	2341	4982	0.00136861	4.98e-07	8.47137	7.32377	0.117723	1.1567	8.56405	2.99147	15.7951	18.7214
2021-03-22	0-063	O3	0.5723	0.2604				2559	2389	4992	0.00160534	2.69e-07	10.5416	8.93642	0.100231	1.17962	8.79756	3.38674	19.478	19.5762
2021-03-22	0-064	O3	0.3512	0.1577				2486	2444	4963	0.00286508	7.74e-07	6.3718	9.23646	0.251359	0.689853	8.01226	2.99837	15.6083	17.8751
2021-03-22	0-065	O3	0.6324	0.2972				2477	2429	4986	0.000839608	1.36e-07	9.0665	9.84653	0.0703406	0.920782	8.54842	3.41635	18.913	19.4024
2021-03-22	0-066	O3	0.6754	0.3273				2572	2389	4977	0.00140641	3.99e-07	11.7178	11.9002	0.120733	0.984671	9.82399	3.75477	23.618	21.8095
2021-03-22	0-067	O3	0.644	0.297				2575	2403	4991	0.00160503	3.98e-07	12.9456	11.4112	0.0829573	1.13446	10.2188	3.70103	24.3569	22.6975
2021-03-22	0-068	O3	0.6281	0.2983				2464	2304	4997	0.00104173	4.38e-07	8.85542	9.89038	0.100101	0.895357	9.16522	3.29969	18.7458	20.3638
2021-03-22	0-069	O3	0.3803	0.1719				2570	2364	4970	0.000909519	3.19e-07	8.86904	8.10309	0.0890378	1.09453	7.73608	3.26748	16.9721	17.8521
2021-03-22	0-070	O3	0.4407	0.2079				2433	2251	4794	0.00148859	7.87e-07	8.14325	6.68258	0.113485	1.21858	7.1155	3.20878	14.8258	16.5964
2021-03-22	0-071	O3	0.6429	0.2966				2537	2401	4986	0.00115193	3.61e-07	11.2533	10.1549	0.0692708	1.10817	9.47434	3.45556	21.4083	21.1544
2021-03-22	0-072	O3	0.76	0.3544				2549	2432	4993	0.00422018	2.75e-06	11.5511	15.7323	0.198902	0.734231	10.24	3.95058	27.2834	23.1034
2021-03-22	0-073	O3	0.3896	0.1634				2496	2349	4968	0.00134298	3.5e-07	8.5593	9.89974	0.09978	0.864599	8.37147	3.43434	18.459	18.871
2021-03-22	0-074	O3	0.2874	0.1291				2292	2149	4502	0.000527614	1.26e-07	5.93488	6.43509	0.0417556	0.922268	7.09386	2.73699	12.37	15.6905
2021-03-22	0-075	O3	0.5007	0.2369				2544	2371	4980	0.00032334	3.98e-08	8.33829	8.61718	0.0485327	0.967635	8.78843	3.06636	16.9555	19.2741
2021-03-22	0-076	O3	0.4356	0.1933				2421	2271	4991	0.00122094	2.63e-07	8.75888	7.54635	0.0965155	1.16068	8.12104	2.98145	16.3052	18.0273
2021-03-22	0-077	O3	0.6843	0.3119				2584	2356	4973	0.00102093	1.58e-07	12.2392	12.0636	0.0827378	1.01456	9.81489	3.70493	24.3028	21.9392
2021-03-22	0-078	O3	0.4283	0.1982				2590	2398	4988	0.00205781	1.23e-06	8.27769	6.22015	0.149105	1.33079	8.06907	2.86838	14.4978	17.6774
2021-03-22	0-079	O3	0.5751	0.2703				2487	2334	4988	0.00216199	7.5e-07	9.83602	11.9979	0.138131	0.819811	9.60314	3.47365	21.8339	21.2701
2021-03-22	0-080	O3	0.7041	0.3195				2567	2397	4989	0.000835114	2.67e-07	12.583	12.9696	0.0578537	0.970197	9.76469	3.87399	25.5526	22.0796
2021-03-22	0-081	O3	0.5737	0.264				2312	2462	4987	0.000817308	2.01e-07	10.0746	10.6479	0.0536457	0.946166	8.4595	3.78334	20.7225	19.5968
2021-03-22	0-082	O3	0.2983	0.134				2290	2194	4553	0.00121473	4.11e-07	5.68003	6.8594	0.13537	0.828066	6.71819	2.86317	12.5394	15.6149
2021-03-22	0-083	O3	0.7236	0.3487				2544	2412	4981	0.00224424	1.4e-06	15.0421	12.8023	0.0785214	1.17495	10.8475	3.85627	27.8444	24.0358
2021-03-22	0-084	O3	0.3605	0.1597				2559	2434	4992	0.00105805	7.25e-07	8.26708	9.16823	0.122606	0.901709	8.37572	3.20974	17.4353	18.7618
2021-03-22	0-085	O3	0.4647	0.2085				2511	2315	4981	0.00099689	3.38e-07	9.63754	10.5798	0.0640428	0.910937	8.9613	3.51801	20.2174	20.1395
2021-03-22	0-086	O3	0.7486	0.3572				2548	2429	4984	0.00125775	2.38e-07	12.1547	13.4116	0.076515	0.906282	10.0992	3.89536	25.5662	22.524
2021-03-22	0-087	O3	0.2632	0.1193				2084	2041	4298	0.000582771	8e-08	5.05208	5.63485	0.0960888	0.896577	6.65608	2.53304	10.6869	14.822
2021-03-22	0-088	O3	0.5365	0.251				2514	2313	4972	0.000850209	1.24e-07	9.80162	8.95844	0.0632659	1.09412	9.49451	3.08417	18.7601	20.544
2021-03-22	0-089	O3	0.3893	0.1872				2396	2566	4983	0.00297969	4.11e-07	5.81931	8.79895	0.295626	0.661364	8.04927	2.79803	14.6183	17.688
2021-03-22	0-090	O3	0.5858	0.2729				2561	2115	4992	0.000742611	3.54e-07	10.3796	9.98528	0.0540502	1.03949	7.33796	4.04051	20.3649	18.6405
2021-03-22	0-091	O3	0.7781	0.3681				2548	2360	4976	0.00118656	5.08e-07	15.7495	14.8015	0.0473605	1.06405	11.0156	4.2397	30.551	25.0183
2021-03-22	0-092	O3	0.3793	0.1787				2566	2418	4991	0.00111506	3.47e-07	7.75317	6.69604	0.0860282	1.15787	7.84464	2.75761	14.4492	17.3404
2021-03-22	0-093	O3	0.5124	0.2302				2586	2368	4980	0.000903069	1.82e-07	9.47975	10.3821	0.0741788	0.913085	9.21412	3.31491	19.8619	20.5657
2021-03-22	0-094	O3	0.6792	0.3114				2511	2458	4984	0.00162863	5.7e-07	10.5598	12.1885	0.112365	0.866379	9.74934	3.66614	22.7483	21.6497
2021-03-22	0-095	O3	0.5928	0.275				2540	2346	4957	0.00140496	2.98e-07	11.0169	9.61245	0.0916664	1.14611	8.61173	3.60922	20.6294	19.7954
2021-03-22	0-096	O3	0.7571	0.3471				2525	2287	4977	0.00217421	5.09e-07	13.4808	11.3306	0.106308	1.18977	10.0182	3.65902	24.8114	22.3143
2021-03-22	0-097	O3	0.5334	0.2527				2534	2440	4983	0.000877459	2.87e-07	9.4253	10.2817	0.0547409	0.916709	8.89442	3.30882	19.707	19.7192
2021-03-22	0-098	O3	0.9867	0.4756				2537	2413	4994	0.00205101	7.75e-07	15.7408	13.6899	0.0831646	1.14981	10.3267	4.29063	29.4307	23.3251
2021-03-22	0-099	O3	0.5687	0.2587				2449	2406	4965	0.00110309	7.31e-07	10.5506	9.81814	0.102368	1.07461	8.17088	3.53609	20.3688	18.8084
2021-03-22	0-100	O3	0.4404	0.2237				2497	2467	4978	0.000508711	9.23e-08	8.21827	8.61799	0.0715528	0.953618	8.41993	2.9944	16.8363	18.4662
2021-03-22	0-101	O3	0.5464	0.2651				2536	2422	4991	0.00138978	2.39e-07	9.63862	8.25779	0.10491	1.16722	8.63795	3.1887	17.8964	19.0921
2021-03-22	0-102	O3	0.3284	0.142				2527	2399	4984	0.00133935	6.62e-07	9.24398	7.95427	0.102057	1.16214	8.23969	3.21573	17.1982	18.2197
2021-03-22	0-103	O3	0.2577	0.1121				2156	2203	4545	0.000503069	1.05e-07	6.10018	6.60313	0.0626915	0.923831	7.18082	2.58786	12.7033	15.8424
2021-03-22	0-104	O3	0.4113	0.1969				2219	2126	4618	0.000216977	4.08e-08	6.99343	6.88074	0.0538872	1.01638	7.08166	3.10508	13.8742	16.166
2021-03-22	0-105	O3	0.4978	0.2504				2366	2115	4490	0.000989153	7.53e-08	7.58017	6.59109	0.104677	1.15006	6.64136	3.10215	14.1713	15.6389
2021-03-22	0-106	O3	1.1005					2613	2348	4996	0.000706362	1.64e-07	11.6888	11.09	0.0491253	1.054	9.32655	3.49708	22.7788	21.576
2021-03-22	0-107	O3	0.4975	0.2241				2553	2426	4984	0.00165863	7.8e-07	10.2146	11.764	0.103774	0.868294	9.39662	3.4647	21.9787	20.7422
2021-03-22	0-108	O3	0.3656	0.1588				2572	2402	4986	0.00292678	1.48e-06	10.8014	7.87481	0.182737	1.37164	8.55503	3.28312	18.6762	18.971
2021-03-22	0-109	O3	0.3856	0.1843				2351	2148	4508	0.000305977	3.19e-08	6.89413	6.58955	0.0348397	1.04622	6.99588	2.90749	13.4837	15.7471
2021-03-22	0-110	O3	0.6737	0.3153				2504	2374	4972	0.00243558	6.99e-07	10.1827	12.6168	0.123571	0.80707	9.19532	3.65462	22.7995	20.6561
2021-03-22	0-111	O3	0.5018	0.2423				2538	2366	4984	0.0003775	7.14e-08	8.10014	7.92474	0.0372807	1.02213	7.59447	3.30928	16.0249	17.4096
2021-03-22	0-112	O3	0.5038	0.2365				2634	2353	4992	0.00215149	1.05e-06	9.8092	7.65991	0.133683	1.28059	8.5372	3.17108	17.4691	19.1237
2021-03-22	0-113	O3	0.3094	0.1351				2522	2394	4981	0.000280903	3.09e-08	6.95866	7.12689	0.0307116	0.976394	7.47337	2.83284	14.0855	16.8617
2021-03-22	0-114	O3	0.3528	0.1748				2465	2429	4968	0.00111928	3.68e-07	6.71132	7.81784	0.103956	0.858462	7.88855	2.69849	14.5292	17.2738
2021-03-22	0-115	O3	0.4232	0.1857				2539	2365	4951	0.000424633	5.79e-08	9.61899	9.62584	0.0359572	0.999288	8.01156	3.568	19.2448	18.572
2021-03-22	0-116	O3	0.4625	0.2144				2595	2376	4990	0.0010049	2.48e-07	8.56322	9.47473	0.0695137	0.903796	8.10275	3.26686	18.0379	18.2603
2021-03-22	0-117	O3	0.7792					2594	2387	4984	0.00101131	6.71e-07	14.499	14.3494	0.0743872	1.01043	10.4408	3.9194	28.8484	23.3883
2021-03-22	0-118	O3	0.5622	0.2687				2538	2424	4978	0.000710775	1.76e-07	10.2466	9.60069	0.0553722	1.06728	8.09638	3.43142	19.8473	18.6482
2021-03-22	0-119	O3	0.5723	0.281				2474	2374	4982	0.000552457	9.12e-08	9.53181	9.70084	0.04071	0.982576	8.51923	3.38382	19.2326	19.0517
2021-03-22	0-120	O3	0.8731	0.4177				2576	2383	4983	0.00111041	3.02e-07	15.3788	14.3689	0.0475316	1.07028	10.3729	4.08949	29.7477	23.3383
2021-03-22	0-121	O3	0.3136	0.1443				2225	2044	4591	0.000813934	2.28e-07	7.1871	6.39079	0.0636988	1.1246	7.09392	2.89399	13.5779	16.0525
2021-03-22	0-122	O3	0.4812	0.2144				2417	2385	4991	0.00194804	1.08e-06	9.56118	11.4811	0.102764	0.832778	8.12589	3.88323	21.0422	19.2065
2021-03-22	0-123	O3	0.4512	0.2248				2517	2418	4984	0.000274883	4.95e-08	8.23132	8.09406	0.037934	1.01696	8.0747	3.15092	16.3254	18.0519
2021-03-22	0-124	O3	0.5055	0.2404				2643	2344	4991	0.000702191	2.68e-07	9.04911	8.66514	0.057826	1.04431	8.11998	3.05404	17.7143	18.4791
2021-03-22	0-125	O3	0.617	0.3125				2553	2419	4984	0.000854815	1.96e-07	10.9588	10.5445	0.0644462	1.03929	8.91263	3.4154	21.5034	20.1049
2021-03-22	0-126	O3	0.4322	0.1983				2570	2378	4990	0.00149238	6.38e-07	7.82968	8.62663	0.156845	0.907618	7.83226	3.17912	16.4563	17.6605
2021-03-22	0-127	O3	0.8684	0.4204				2533	2378	4983	0.000512375	2.19e-07	14.0124	13.6224	0.0408963	1.02863	9.3483	4.1352	27.6348	22.0991
2021-03-22	0-128	O3	0.8302	0.3948				2573	2394	4977	0.00256373	6.95e-07	14.6234	17.1724	0.0953657	0.851567	11.0763	4.19517	31.7958	24.8055
2021-03-22	0-129	O3	0.5541	0.2516				2515	2339	4974	0.000560169	1.95e-07	10.4298	10.5983	0.0561376	0.984107	9.35665	3.28708	21.0281	20.8496
2021-03-22	0-130	O3	0.3003					2505	2464	4989	0.000542887	7.43e-08	7.15773	7.6841	0.063832	0.931499	8.19054	2.87733	14.8418	17.8536
2021-03-22	0-131	O3	0.3817	0.1606				2468	2366	4990	0.000877	1.98e-07	8.74879	8.57327	0.0843966	1.02047	8.25504	3.20565	17.3221	18.4525
2021-03-22	0-132	O3	0.3135	0.1336				2395	2246	4728	0.000549734	7.28e-08	6.91548	6.50101	0.0618346	1.06376	7.07449	2.93013	13.4165	16.1082
2021-03-22	0-133	O3	0.7263	0.3553				2512	2399	4982	0.00145107	5.5e-07	11.4635	12.8284	0.0877163	0.893603	10.0367	3.68586	24.292	22.1375
2021-03-22	0-134	O3	0.6763	0.3229				2496	2448	4987	0.000867821	2.41e-07	12.6932	12.0352	0.0502885	1.05468	9.86818	3.69276	24.7284	22.0096
2021-03-22	0-135	O3	0.4412	0.2108				2128	2140	4266	0.000338439	4.56e-08	6.94545	7.12254	0.040412	0.975138	6.44446	3.14746	14.068	15.1818
2021-03-22	0-136	O3	0.4041	0.2073				2120	2097	4563	0.000487731	3.88e-08	7.20999	6.87717	0.0696807	1.0484	7.3775	2.89824	14.0872	16.3492
2021-03-22	0-137	O3	0.482	0.2315				2502	2388	4986	0.000325923	8.5e-08	8.83273	8.8518	0.0529176	0.997845	8.12958	3.35373	17.6845	18.4532
2021-03-22	0-138	O3	0.4271	0.1957				2406	2319	4981	0.000337831	8.69e-08	8.87137	8.86016	0.0499535	1.00126	8.12943	3.3604	17.7315	18.4503
2021-03-22	0-139	O3	0.4602	0.2285				2483	2483	4991	0.000991716	3.68e-07	9.33499	10.3265	0.0932911	0.903981	8.91037	3.14983	19.6615	19.6088
2021-03-22	0-140	O3	0.6154	0.2753				2512	2388	4976	0.00140656	1.03e-06	11.657	12.9412	0.111675	0.900766	10.0197	3.75742	24.5983	22.3945
2021-03-22	0-141	O3	0.3081	0.1334				2530	2397	4984	0.00037413	4.22e-08	7.74733	8.04923	0.050592	0.962493	8.04328	2.99149	15.7966	17.6516
2021-03-22	0-142	O3	0.697	0.3559				2571	2417	4991	0.000494531	1.29e-07	9.63044	9.94431	0.0589248	0.968437	8.90156	3.40436	19.5747	19.7511
2021-03-22	0-143	O3	0.5075	0.2294				2411	2279	4968	0.000404097	5.74e-08	9.18665	9.45713	0.04213	0.9714	8.0141	3.44697	18.6438	18.3516
2021-03-22	0-144	O3	0.4579	0.2089				2584	2313	4991	0.00148185	4e-07	9.74355	8.3322	0.0928643	1.16939	8.79989	3.11102	18.0757	19.6687
2021-03-22	0-145	O3	0.4237	0.1934				2369	2343	4972	0.000970714	3.58e-07	7.83238	8.75163	0.0863088	0.894963	7.66822	3.09848	16.584	17.4583
2021-03-22	0-146	O3	0.4419	0.2077				2393	2319	4977	0.000804321	8.28e-08	7.90925	8.71329	0.0836085	0.907723	7.50665	3.15302	16.6225	17.2495
2021-03-22	0-147	O3	0.369	0.1825				2043	1953	4262	0.00114532	2.68e-07	6.85674	5.7136	0.110099	1.20007	6.6888	2.86835	12.5703	15.1609
2021-03-22	0-148	O3	0.2371	0.1005				2190	2064	4270	0.000377068	7.1e-08	5.1598	5.48387	0.0740849	0.940905	6.43802	2.46736	10.6437	14.6132
2021-03-22	0-149	O3	0.7772	0.358				2507	2487	4991	0.0022303	8.82e-07	12.7421	14.9404	0.134785	0.852864	10.3971	3.90169	27.6826	23.1062
2021-03-22	0-150	O3	0.5508	0.2494				2512	2394	4979	0.00104059	3.2e-07	11.6013	10.5695	0.0660234	1.09762	9.1802	3.52234	22.1708	20.5464
2021-03-22	0-151	O3	0.4145	0.1963				2639	2343	4987	0.000992019	3.12e-07	6.8951	6.19913	0.0856193	1.11227	7.57208	2.77553	13.0942	17.0366
2021-03-22	0-152	O3	0.3689	0.1713				2304	2269	4817	0.00179026	2.33e-07	7.0517	8.84196	0.163553	0.797527	7.53435	3.20533	15.8937	17.0553
2021-03-22	0-153	O3	0.3221	0.1502				2279	2198	4669	0.000369607	6.45e-08	6.42636	6.69058	0.0458658	0.960509	7.43542	2.56936	13.1169	16.2167
2021-03-22	0-154	O3	0.5233	0.2576				2537	2347	4996	0.000817463	2.58e-07	8.55572	9.36875	0.04816	0.913219	8.80491	3.06078	17.9245	19.3503
2021-03-22	0-155	O3	0.6244	0.3046				2560	2422	4991	0.000562316	1.34e-07	12.1438	11.9652	0.052746	1.01492	9.68299	3.715	24.109	21.5187
2021-03-22	0-156	O3	0.2242	0.1027				1921	1666	3619	0.000185914	2.96e-08	4.27849	4.31659	0.0556173	0.991172	5.31932	2.43207	8.59508	12.4957
2021-03-22	0-157	O3	0.7471	0.3629				2540	2384	4990	0.00133042	7.35e-07	13.9901	13.1234	0.0749731	1.06604	10.1106	4.02514	27.1135	22.6259
2021-03-22	0-158	O3	0.5431	0.241				2431	2329	4996	0.00432668	4.37e-06	7.41869	11.7301	0.214472	0.632451	8.41151	3.39292	19.1488	18.8453
2021-03-22	0-159	O3	0.8539	0.4252				2534	2345	4991	0.00215359	6.98e-07	12.6201	10.4665	0.107716	1.20576	8.80564	4.06006	23.0865	20.3414
2021-03-22	0-160	O3	0.8501	0.4096				2481	2375	4989	0.00253139	1.84e-06	15.7066	13.2001	0.0849211	1.18989	10.5182	4.24858	28.9067	23.5713
2021-03-22	0-161	O3	0.6088	0.2735				2521	2300	4982	0.00101388	3.9e-07	12.5302	13.3223	0.0556382	0.940545	9.8085	3.76054	25.8525	22.099
2021-03-22	0-162	O3	0.4762	0.2181				2520	2431	4988	0.00204493	1.11e-06	11.5046	9.46346	0.0983303	1.21569	8.8479	3.44931	20.968	19.7439
2021-03-22	0-163	O3	0.5845	0.2715				2419	2423	4990	0.00144582	9.09e-07	10.9532	12.399	0.096137	0.883396	9.6775	3.60161	23.3522	21.3743
2021-03-22	0-164	O3	0.4803	0.217				2602	2378	4987	0.00157143	3.12e-07	10.7353	9.16472	0.0950896	1.17137	9.14211	3.19212	19.9	20.4081
2021-03-22	0-165	O3	0.442	0.2001				2306	2168	4718	0.00112709	2.81e-07	7.17307	8.09089	0.102024	0.886561	7.29978	3.06304	15.264	16.5292
2021-03-22	0-166	O3	0.3986	0.1891				2572	2354	4988	0.000759325	6.48e-08	7.60163	7.46331	0.116732	1.01853	7.81752	2.88766	15.0649	17.4851
2021-03-22	0-167	O3	0.5304	0.2634				2520	2391	4985	0.000892168	3.28e-07	8.13489	7.72368	0.0774283	1.05324	8.04057	3.10967	15.8586	17.917
2021-03-22	0-168	O3	0.6171	0.2894				2576	2394	4977	0.000783358	1.62e-07	10.3746	10.8981	0.0600127	0.951957	9.47029	3.51501	21.2727	20.8541
2021-03-22	0-169	O3	0.5924	0.2814				2485	2475	4981	0.00133433	4.75e-07	9.40757	10.7401	0.0950044	0.875933	8.06324	3.72434	20.1476	18.7076
2021-03-22	0-170	O3	0.8409	0.3896				2514	2447	4985	0.000902358	1.82e-07	15.4432	16.3081	0.0379543	0.946963	10.9513	4.24036	31.7513	24.3912
2021-03-22	0-171	O3	0.6391	0.2842				2491	2260	4987	0.00102725	3.71e-07	12.4969	11.6919	0.0720127	1.06885	8.90989	4.04067	24.1888	20.5585
2021-03-22	0-172	O3	0.5554	0.2503				2542	2443	4992	0.000427476	1.45e-07	13.0429	13.2846	0.0242801	0.981805	9.60227	4.02524	26.3275	21.6501
2021-03-22	0-173	O3	0.5423	0.2577				2453	2419	4990	0.00142995	5.24e-07	10.8351	12.2582	0.0990067	0.883907	9.15053	3.89263	23.0932	20.7811
2021-03-22	0-174	O3	0.7887	0.3696				2517	2453	4987	0.00185853	9.82e-07	15.7714	17.6006	0.103395	0.896071	11.0811	4.49709	33.3719	24.7708
2021-03-22	0-175	O3	0.8215	0.3985				2527	2307	4983	0.00111147	1.86e-07	13.8424	14.0131	0.066651	0.987816	10.2583	3.95252	27.8554	23.0303
2021-03-22	0-176	O3	0.8765	0.4225				2506	2424	4985	0.00258917	2.54e-07	13.3648	15.9539	0.136261	0.837715	10.4824	4.20209	29.3188	23.594
2021-03-22	0-177	O3	0.396	0.1777				2511	2258	4974	0.000221942	2e-08	7.823	7.95563	0.0358134	0.983328	7.99118	3.01802	15.7786	17.8314
2021-03-22	0-178	O3	0.4846	0.2265				2549	2378	4971	0.000515697	1.53e-07	9.74415	9.79	0.0553961	0.995316	8.75395	3.41965	19.5341	19.5118
2021-03-22	0-179	O3	0.5931	0.2714				2529	2429	4984	0.000489094	9.98e-08	10.4194	10.8489	0.0315186	0.960415	8.38567	3.60486	21.2683	19.4498
2021-03-22	0-180	O3	0.3869	0.1858				2492	2327	4963	0.00103728	3e-07	6.7329	7.7643	0.109021	0.867161	7.90501	2.94771	14.4972	17.4223
2021-03-22	0-181	O3	0.7396	0.3555				2404	2365	4989	0.0017019	5.09e-07	11.0263	12.686	0.088276	0.869165	9.41673	3.70083	23.7123	21.1177
2021-03-22	0-182	O3	0.7887	0.3735				2596	2366	4983	0.00148631	2.64e-07	13.3059	11.821	0.0833325	1.12562	9.4019	3.8876	25.1269	21.4167
2021-03-22	0-183	O3	0.5472	0.2389				2518	2436	4987	0.00174705	1.24e-06	9.81191	11.5567	0.107764	0.849024	8.56353	3.53631	21.3686	19.4711
2021-03-22	0-184	O3	0.3902	0.1983				2140	2024	4182	0.000304016	3.62e-08	7.24519	7.07381	0.0497011	1.02423	6.2785	3.32496	14.319	15.0435
2021-03-22	0-185	O3	0.3029	0.1534				2141	2075	4506	0.000678947	6.48e-08	6.24682	5.75784	0.0911997	1.08492	7.20373	2.59597	12.0047	15.7455
2021-03-22	0-186	O3	0.3085	0.146				1984	1920	4007	0.000309035	4.61e-08	5.94044	6.24675	0.0634764	0.950964	6.15586	2.87132	12.1872	14.2761
2021-03-22	0-187	O3	0.4792	0.2311				2541	2367	4991	0.0011345	3.41e-07	9.02207	7.96503	0.0884926	1.13271	8.24557	3.17779	16.9871	18.491
2021-03-22	0-188	O3	0.652	0.3312				2435	2365	4980	0.00296469	8.94e-07	8.90145	11.8661	0.194236	0.750158	8.7655	3.44707	20.7676	19.6824
2021-03-22	0-189	O3	0.7316	0.377				2497	2434	4986	0.00226384	1.28e-06	11.0962	13.3421	0.103596	0.831672	10.0795	3.81509	24.4383	22.3443
2021-03-22	0-190	O3	0.4078	0.2028				1582	1596	4185	0.000684222	8.19e-08	7.77064	7.10834	0.0666311	1.09317	6.4013	3.40133	14.879	15.3496
2021-03-22	0-191	O3	0.2815	0.1378				1839	1815	3721	0.0012494	1.2e-07	4.52086	5.77018	0.158213	0.783488	5.82588	2.60583	10.291	13.3573
2021-03-22	0-192	O3	0.3029	0.1446				2377	2337	4738	0.000484596	1.98e-07	5.8137	6.24427	0.0836316	0.931045	7.38341	2.68873	12.058	16.2262
2021-03-22	0-193	O3	0.7577	0.3766				2552	2436	4993	0.00177937	8.13e-07	12.6892	14.4482	0.100136	0.878258	10.6202	3.99715	27.1374	23.6521
2021-03-22	0-194	O3	0.4157	0.1808				2467	2425	4930	0.000662865	1.07e-07	7.84555	7.62984	0.0916002	1.02827	7.76097	3.04219	15.4754	17.3071
2021-03-22	0-195	O3	0.4325	0.2139				2550	2475	5010	0.000651345	1.04e-07	7.823	7.67091	0.0972416	1.01983	7.76079	3.04509	15.4939	17.3673
2021-03-22	0-196	O3	0.64	0.3237				2506	2323	4958	0.00333786	1.81e-06	11.6967	8.35882	0.189685	1.39932	8.97599	3.41437	20.0555	19.9277
2021-03-22	0-197	O3	0.6786	0.3358				2520	2344	4981	0.00104456	1.51e-07	10.3561	11.4006	0.072584	0.908382	8.84043	3.51583	21.7566	20.0632
2021-03-22	0-198	O3	0.6374	0.2853				2503	2428	4987	0.000807295	2.84e-07	13.3928	13.9522	0.0630163	0.959903	10.277	3.86295	27.345	22.9736
2021-03-22	0-199	O3	0.4844	0.2404				2382	2315	4985	0.00153492	4.97e-07	9.52824	7.99344	0.115263	1.19201	8.49596	3.12458	17.5217	18.6299
2021-03-22	0-200	O3	0.6819	0.3326				2454	2358	4835	0.000894664	4.55e-07	10.6489	9.8429	0.0503427	1.08188	8.66205	3.73668	20.4918	19.5751
2021-03-22	0-201	O3	0.3369	0.1522				2449	2297	4816	0.000675209	1.21e-07	7.74973	7.25026	0.0662099	1.06889	7.22663	3.1054	15	16.5634
2021-03-22	0-202	O3	0.288	0.1315				2254	2143	4628	0.00159888	4.47e-07	5.75202	7.33343	0.147277	0.784356	7.25491	2.76065	13.0855	16.0968
2021-03-22	0-203	O3	0.5506	0.257				2565	2411	4997	0.000874467	1.53e-07	8.98525	9.82963	0.0829841	0.914098	8.16574	3.6592	18.8149	18.6401
2021-03-22	0-204	O3	0.6018	0.2782				2549	2370	4969	0.00107776	2.94e-07	10.2417	10.9834	0.0968196	0.932471	9.07823	3.58335	21.2251	20.4415
2021-03-22	0-205	O3	0.6256	0.3016				2514	2275	4987	0.00241598	1.21e-06	10.5432	8.14349	0.142893	1.29468	8.93742	3.35041	18.6867	19.7647
2021-03-22	0-206	O3	0.4779	0.2407				2529	2442	4980	0.000609931	8.75e-08	9.32182	9.05199	0.0468723	1.02981	8.95915	3.22677	18.3738	19.78
2021-03-22	0-207	O3	0.5433	0.2624				2477	2384	4969	0.000706782	9.06e-08	10.3604	10.8505	0.067663	0.954835	9.46251	3.41682	21.2109	21.0031
2021-03-22	0-208	O3	0.4125	0.1911				2638	2348	4991	0.00211321	1.29e-06	10.7178	8.64573	0.151111	1.23966	7.77468	3.67612	19.3635	18.2839
2021-03-22	0-209	O3	0.7725	0.3546				2599	2372	4995	0.0012972	8.06e-07	15.1126	13.8173	0.0760067	1.09374	10.7225	4.06237	28.93	24.0087
2021-03-22	0-210	O3	0.6703	0.3235				2530	2420	4967	0.000444849	5.35e-08	9.67012	9.89652	0.0399222	0.977123	9.07548	3.24882	19.5666	19.9772
2021-03-22	0-211	O3	0.3422	0.1645				2279	2229	4516	0.00102111	2e-07	5.90262	6.92011	0.0934793	0.852966	6.94575	2.8719	12.8227	15.6233
2021-03-22	0-213	O3	0.4714	0.2317				2558	2402	4972	0.000399275	9.80853e-08	7.87032	7.97306	0.0398888	0.987114	7.66189	3.1593	15.8434	17.5247
2021-03-22	0-214	O3	0.3088	0.1412				2506	2343	4924	0.000508095	1.6e-07	6.70446	6.22761	0.0581956	1.07657	7.65	2.68577	12.9321	16.774
2021-03-22	0-215	O3	0.7328	0.3728				2484	2448	4979	0.00120617	4.68e-07	12.5436	13.4989	0.0736654	0.929231	10.1245	3.86886	26.0425	22.911
2021-03-22	0-216	O3	0.6252	0.3058				2573	2343	4973	0.00148106	3.44e-07	10.5842	9.23411	0.111152	1.14621	8.87872	3.29396	19.8183	19.7174
2021-03-22	0-217	O3	0.5497	0.2625				2473	2274	4996	0.00115513	3.75e-07	9.04239	9.89951	0.132607	0.913418	9.55987	3.41734	18.9419	20.9531
2021-03-22	0-218	O3	0.5534	0.2749				2580	2382	4974	0.000325639	5.13e-08	10.5862	10.4923	0.0313573	1.00895	8.89166	3.50403	21.0785	20.2156
2021-03-22	0-219	O3	0.6093	0.298				2584	2403	4989	0.0018314	7.03e-07	9.29469	11.021	0.0990185	0.843362	8.58418	3.53306	20.3157	19.5497
2021-03-22	0-220	O3	0.93	0.4547				2543	2432	4993	0.000585731	2.2e-07	17.1475	17.3984	0.0214031	0.985577	11.8476	4.43126	34.5459	26.8675
2021-03-22	0-221	O3	0.3217	0.1535				2315	2233	4618	0.000484265	1.1e-07	6.03925	6.17414	0.0974382	0.978153	7.2822	2.61711	12.2134	15.9686
2021-03-22	0-222	O3	0.3357	0.1733				2527	2351	4991	0.00123002	2.21e-07	6.75597	7.98058	0.140389	0.846551	8.57446	2.87207	14.7366	18.7404
2021-03-22	0-223	O3	0.8231	0.4				2488	2291	4977	0.000800178	2.67e-07	15.3873	14.7503	0.0459222	1.04319	10.6313	4.22302	30.1376	24.0069
2021-03-22	0-224	O3	0.6092	0.2887				2490	2398	4991	0.000827476	2.44e-07	10.9797	10.9118	0.0667341	1.00622	9.15132	3.51259	21.8915	20.5253
2021-03-22	0-225	O3	0.5854	0.2785				2416	2300	4994	0.00138823	2.71e-07	8.71475	10.084	0.0972401	0.864215	8.71951	3.36266	18.7988	19.4794
2021-03-22	0-226	O3	0.6197	0.2822				2452	2404	4988	0.0017525	7.77e-07	11.606	13.3533	0.0910562	0.869149	10.1361	3.85389	24.9593	22.3969
2021-03-22	0-227	O3	0.752	0.3334				2575	2340	4969	0.00146569	6.64e-07	12.048	10.7537	0.106214	1.12036	8.75547	3.95561	22.8017	20.4026
2021-03-22	0-228	O3	0.4922	0.2183				2606	2373	4990	0.00203348	6.53e-07	10.7959	8.76239	0.148174	1.23207	9.13495	3.25294	19.5583	20.2273
2021-03-22	0-229	O3	0.8185	0.3902				2563	2415	4989	0.00258919	8.83e-07	17.4619	14.9091	0.0937397	1.17122	11.099	4.40128	32.371	25.0597
2021-03-22	0-230	O3	0.5394	0.2588				2464	2350	4991	0.00111485	1.52e-07	11.3286	10.2246	0.0802522	1.10798	8.91102	3.65616	21.5533	20.204
2021-03-22	0-231	O3	0.423	0.1996				2233	2157	4588	0.000727782	2.44e-07	6.84857	7.5395	0.0466616	0.908359	7.02448	3.10326	14.3881	16.0749
2021-03-22	0-232	O3	0.7801	0.3809				2578	2312	4980	0.00293901	2e-06	10.0828	12.8905	0.179888	0.782193	10.2697	3.47548	22.9733	22.7134
2021-03-22	0-233	O3	0.4364	0.2081				2513	2416	4970	0.000739052	4.79e-07	7.68911	8.34288	0.0802508	0.921638	8.42463	2.95898	16.032	18.6628
2021-03-22	0-234	O3	0.5031	0.2489				2400	2372	4993	0.00238215	2.69e-07	8.65115	11.0332	0.17741	0.784101	8.54647	3.59057	19.6844	19.6537
2021-03-22	0-235	O3	0.5266	0.2558				2542	2418	4978	0.000842738	2.4e-07	8.76167	8.29804	0.0950931	1.05587	8.04325	3.29702	17.0597	18.3332
2021-03-22	0-236	O3	0.3119	0.1492				2135	2019	4173	0.000452758	7.35e-08	6.04434	6.43883	0.0527338	0.938733	6.3385	2.90127	12.4832	14.6705
2021-03-22	0-237	O3	0.6134	0.2938				2561	2425	4991	0.00305004	1.79e-06	8.31914	11.2489	0.178474	0.739549	8.86464	3.50704	19.5681	19.7936
2021-03-22	0-238	O3	0.2576	0.1215				2196	2030	4255	0.0025321	1.09e-06	3.71495	6.22463	0.292031	0.596816	6.23783	2.54558	9.93958	14.372
2021-03-22	0-239	O3	0.3731	0.1747				2547	2352	4975	0.000996647	3.02e-07	8.56665	7.66076	0.0784099	1.11825	7.45685	3.2621	16.2274	17.5741
2021-03-22	0-240	O3	0.5578	0.2399				2477	2397	4992	0.00105507	2.67e-07	12.2339	12.8652	0.0803358	0.950929	10.213	3.8022	25.099	22.7914
2021-03-22	0-241	O3	0.5651	0.2764				2450	2337	4982	0.00166296	4.19e-07	8.76125	10.4238	0.127799	0.840503	8.76665	3.37081	19.1851	19.6177
2021-03-22	0-242	O3	0.7271	0.3343				2545	2408	4995	0.00033032	6.19e-08	14.1743	14.2806	0.0276469	0.992553	10.4917	3.99131	28.4549	23.6746
2021-03-22	0-243	O3	0.5579	0.2362				2534	2456	4996	0.00171738	1.23e-06	9.08644	7.59298	0.118529	1.19669	8.10839	3.18292	16.6794	18.2035
2021-03-22	0-244	O3	0.7182	0.3326				2647	2285	4994	0.00233259	8.21e-07	14.6277	12.3681	0.11342	1.1827	11.0212	3.86237	26.9958	24.4764
2021-03-22	0-245	O3	0.2975	0.1443				2235	2106	4495	0.000309752	6.41e-08	6.18041	5.98936	0.0409469	1.0319	7.06009	2.65876	12.1698	15.7101
2021-03-22	0-246	O3	0.6193	0.2898				2534	2445	4992	0.00126074	6.34e-07	10.5465	11.5569	0.101686	0.912569	9.35081	3.72174	22.1034	21.0228
2021-03-22	0-247	O3	0.4381	0.1968				2585	2295	4969	0.000757901	2.13e-07	8.29388	8.7742	0.08346	0.945257	7.95893	3.23688	17.0681	18.121
2021-03-22	0-248	O3	0.5834					2537	2406	4994	0.000983056	2.21e-07	10.3572	11.2125	0.0669304	0.923722	8.99897	3.47687	21.5698	20.4194
2021-03-22	0-249	O3	0.5851	0.2854				2538	2450	4992	0.000367287	6.11e-08	9.31448	9.33211	0.0327633	0.99811	9.08411	3.23667	18.6466	20.0383
2021-03-22	0-250	O3	0.4535	0.2211				2407	2304	4897	0.000877405	1.67e-07	7.10672	6.22933	0.0922796	1.14085	7.69796	2.76255	13.3361	16.861
2021-03-22	0-251	O3	0.5641	0.2655				2555	2426	4994	0.000935102	2.37e-07	9.68057	10.5813	0.0645657	0.914876	8.71347	3.58719	20.2619	19.745
2021-03-22	0-252	O3	0.4745	0.2359				2455	2405	4961	0.000667499	1.24e-07	8.12728	8.50571	0.0710304	0.955509	7.55846	3.2428	16.633	17.3367
2021-03-22	0-253	O3	0.6391	0.2874				2548	2439	4990	0.000608534	1.46e-07	12.23	12.8088	0.0277228	0.954806	9.91247	3.84524	25.0388	22.3117
2021-03-22	0-254	O3	0.6914	0.3276				2516	2424	4978	0.00177552	8.99e-07	14.3741	12.6321	0.0705167	1.1379	9.73135	4.0918	27.0062	22.1408
2021-03-22	0-255	O3	0.8125	0.3841				2530	2452	4986	0.000853432	3.09e-07	14.1086	14.4796	0.0593728	0.974379	10.8475	4.05263	28.5882	24.2068
2021-03-22	0-256	O3	0.5293	0.2502				2611	2317	4991	0.00190245	1.37e-06	11.3146	9.43927	0.118482	1.19867	9.0367	3.53631	20.7539	20.6844
2021-03-22	0-257	O3	0.6877	0.3287				2602	2367	4984	0.00292981	6.65e-07	11.879	14.8081	0.135838	0.8022	9.0575	4.29836	26.6871	22.3021
2021-03-22	0-258	O3	0.5241	0.2498				2546	2328	4964	0.000670971	1.25e-07	8.43123	8.98081	0.0873542	0.938806	8.64883	3.13836	17.412	19.1115
2021-03-22	0-259	O3	0.3038	0.1317				2446	2368	4887	0.00131513	7.96e-08	5.89342	7.20855	0.14404	0.81756	7.60203	2.56897	13.102	16.6832
2021-03-22	0-260	O3	0.2757	0.1266				2300	2179	4585	0.000744727	2.45e-07	5.05699	5.75299	0.1139	0.879019	7.41098	2.46736	10.81	15.9883
2021-03-22	0-261	O3	0.7348	0.3643				2579	2388	4993	0.00254163	8.91e-07	14.66	12.123	0.103135	1.20927	10.3613	3.86793	26.7831	23.5092
2021-03-22	0-262	O3	0.7082	0.332				2425	2394	4990	0.00190386	3.56e-07	10.4547	12.3585	0.141151	0.845948	9.23007	3.83336	22.8132	20.7703
2021-03-22	0-263	O3	0.6426	0.294				2624	2303	4995	0.00274179	7.86e-07	13.7252	11.0056	0.126711	1.24711	9.65573	3.72034	24.7308	22.3327
2021-03-22	0-264	O3	0.6692	0.3125				2569	2412	4995	0.00151732	4.75e-07	11.8521	10.4268	0.0899624	1.1367	9.75773	3.47009	22.2789	21.5027
2021-03-22	0-265	O3	0.5746	0.2387				2547	2394	4990	0.0013206	4.58e-07	8.55525	7.41559	0.117321	1.15368	7.91383	3.15896	15.9708	17.6864
2021-03-22	0-266	O3	0.6226					2577	2406	4988	0.00126446	5.85e-07	11.5113	10.2823	0.0810528	1.11953	9.44927	3.66176	21.7936	20.9817
2021-03-22	0-267	O3	0.5188	0.245				2539	2317	4984	0.00238752	1.21e-06	8.39241	10.735	0.193081	0.781783	9.43448	3.38338	19.1274	20.8453
2021-03-22	0-268	O3	0.6112	0.291				2508	2317	4988	0.000597681	2.45e-07	11.3544	11.1147	0.0552344	1.02157	9.4165	3.6409	22.4691	21.0282
2021-03-22	0-269	O3	0.3354	0.1547				2466	2226	4750	0.00117859	3.75e-07	5.74092	6.91359	0.113389	0.830382	7.29354	2.73064	12.6545	16.2629
2021-03-22	0-270	O3	0.3134	0.1438				1936	1728	3747	0.00147863	7.83e-07	5.61575	4.15162	0.171941	1.35267	5.54801	2.65882	9.76738	13.1151
2021-03-22	0-271	O3	0.4177	0.2014				2589	2373	4991	0.000961861	5.02e-07	10.9421	10.028	0.069338	1.09115	9.1812	3.59028	20.9701	20.6124
2021-03-22	0-272	O3	0.6387	0.3198				2496	2360	5015	0.000892683	5.92e-07	10.9017	10.0643	0.0585593	1.0832	9.17705	3.59046	20.9661	20.6349
2021-03-22	0-273	O3	0.5945	0.2855				2452	2440	4990	0.00294233	1.58e-06	7.8846	10.7958	0.176179	0.730336	8.18025	3.38348	18.6804	18.5526
2021-03-22	0-274	O3	0.5477	0.2399				2515	2300	4982	0.000690527	1.86e-07	10.5188	9.85776	0.0472513	1.06705	7.74931	3.74596	20.3765	18.4197
2021-03-22	0-275	O3	0.5554	0.243				2510	2327	4991	0.00121503	4.81e-07	13.067	11.8547	0.0559952	1.10226	9.37741	3.96717	24.9217	21.315
2021-03-22	0-276	O3	0.7254	0.3567				2397	2490	4963	0.00438125	2.29e-06	8.77517	13.1453	0.26717	0.667553	9.71572	3.48504	21.9204	21.5247
2021-03-22	0-277	O3	0.5471	0.2576				2503	2475	4975	0.000914369	3.01e-07	8.38876	8.98406	0.14504	0.933738	7.98609	3.57979	17.3728	18.493
2021-03-22	0-278	O3	0.5397	0.2435				2535	2417	4980	0.000888551	2.64e-07	11.6515	12.1156	0.0648968	0.961697	9.5601	3.76957	23.7671	21.5265
2021-03-22	0-279	O3	0.5932	0.2851				2653	2264	4988	0.0012145	5.51e-07	10.7134	11.4743	0.105069	0.933681	9.4437	3.57216	22.1877	21.3585
2021-03-22	0-280	O3	0.4514	0.2166				2616	2310	4989	0.000816608	2.67e-07	8.5496	7.86671	0.0813349	1.08681	8.49427	3.09285	16.4163	19.0088
2021-03-22	0-281	O3	0.5821	0.2651				2579	2265	4990	0.00210164	1.3e-06	11.6957	10.0178	0.122184	1.1675	9.08625	3.64313	21.7135	20.5711
2021-03-22	0-282	O3	0.4024	0.1866				2238	2158	4559	0.00212941	9.61e-07	5.76469	7.88163	0.209401	0.731408	6.5123	3.13198	13.6463	15.6785
2021-03-22	0-283	O3	0.5169	0.2529				2450	2419	4988	0.00113518	3.57e-07	8.63455	9.64463	0.079446	0.89527	8.44401	3.36567	18.2792	18.9775
2021-03-22	0-284	O3	0.6747	0.322				2495	2384	4989	0.000785456	2.44e-07	11.5506	12.2978	0.0486702	0.939237	9.83854	3.75165	23.8484	22.0229
2021-03-22	0-285	O3	0.4441	0.215				2533	2296	4980	0.000750371	1.61e-07	8.67035	9.30235	0.0508497	0.93206	8.0721	3.41329	17.9727	18.5658
2021-03-22	0-286	O3	0.562	0.2665				2513	2389	4991	0.000791775	2.48e-07	10.0368	9.9773	0.060036	1.00597	8.84491	3.33865	20.0141	19.7616
2021-03-22	0-287	O3	0.3364	0.1595				2175	2033	4291	0.000852122	2.63e-07	7.24452	6.40847	0.0927658	1.13046	5.94658	3.30263	13.653	14.9172
2021-03-22	0-288	O3	0.5227	0.2288				2573	2397	4995	0.000613454	2.1e-07	11.6626	11.9491	0.065746	0.976029	10.0374	3.55852	23.6117	22.3173
2021-03-22	0-289	O3	0.5381	0.237				2557	2384	4985	0.00108155	4.12e-07	10.8604	10.2835	0.0681412	1.05611	8.96265	3.45875	21.1439	20.0766
2021-03-22	0-290	O3	0.4079	0.1998				2519	2439	4985	0.00187614	6.36e-07	8.06981	9.94594	0.148983	0.811367	8.03078	3.39866	18.0158	18.3421
2021-03-22	0-291	O3	0.5622	0.2727				2555	2364	4985	0.00032552	4.62e-08	10.1145	10.0425	0.0296107	1.00717	8.16807	3.57804	20.157	18.8732
2021-03-22	0-292	O3	0.4567	0.2311				2648	2307	4988	0.00124431	5.26e-07	7.70632	8.58798	0.118481	0.897337	8.50475	3.05463	16.2943	18.8632
2021-03-22	0-293	O3	0.3681	0.1787				2569	2406	4986	0.00154396	1.3e-06	7.33707	5.87283	0.118714	1.24932	7.77727	2.72826	13.2099	17.1394
2021-03-22	0-294	O3	0.3572	0.166				2504	2419	4985	0.000601892	1.21e-07	7.92676	7.33491	0.0402851	1.08069	7.81193	2.91339	15.2617	17.3722
2021-03-22	0-295	O3	0.3545	0.166				2122	1947	4072	0.000668021	2.2e-07	5.68811	5.48305	0.0973704	1.0374	6.08281	2.62999	11.1712	14.2254
2021-03-22	0-296	O3	0.2251	0.1044				1832	1761	3603	0.00035849	3.52e-08	3.9561	4.30759	0.04894	0.918402	5.74588	2.24812	8.26368	12.818
2021-03-22	0-297	O3	0.3523	0.1584				2523	2367	4967	0.00206778	6.8e-07	8.83954	6.77179	0.153106	1.30535	7.74569	3.05402	15.6113	17.415
2021-03-22	0-298	O3	0.5032	0.2523				2536	2374	4980	0.000566655	1.79e-07	8.88895	9.42695	0.0301031	0.942929	8.20988	3.28951	18.3159	18.6435
2021-03-22	0-299	O3	0.5672	0.2907				2511	2441	4985	0.00124254	3.66e-07	8.74598	9.98852	0.115355	0.875603	8.9674	3.3018	18.7345	19.7941
2021-03-22	0-300	O3	0.4212	0.1975				2549	2316	4988	0.000970359	3.4e-07	9.5311	8.59025	0.0763087	1.10953	8.47944	3.20382	18.1214	19.1076
2021-03-22	0-301	O3	0.3765	0.1808				2553	2293	4926	0.000276281	6.76e-08	7.11172	6.92894	0.0525188	1.02638	6.98588	2.9988	14.0407	16.4629
2021-03-22	0-302	O3	0.3785	0.1898				2396	2174	4584	0.000872808	2.81e-07	7.24598	6.40011	0.0881567	1.13217	7.05986	3.01044	13.6461	16.0548
2021-03-22	0-303	O3	0.44	0.2245				2479	2324	4829	0.000702258	7.61e-08	7.73635	8.13171	0.0675031	0.95138	7.21579	3.27864	15.8681	16.7988
2021-03-22	0-304	O3	0.3152	0.1477				2267	2224	4511	0.000469434	1.08e-07	6.2008	6.60801	0.0431452	0.938376	6.99415	2.81595	12.8088	15.7611
2021-03-22	0-305	O3	0.6584	0.3237				2462	2426	4984	0.00198887	4.39e-07	10.3542	12.343	0.119345	0.838867	9.70465	3.6295	22.6972	21.5552
2021-03-22	0-306	O3	1.0485	0.4933				2610	2349	4981	0.00199558	1.41e-06	19.3081	17.4078	0.0839594	1.10916	12.1957	4.55925	36.7159	27.1008
2021-03-22	0-307	O3	0.5764	0.2674				2559	2384	4984	0.000955854	2.32e-07	11.9655	11.0142	0.0609431	1.08637	9.44641	3.73664	22.9797	21.3144
2021-03-22	0-308	O3	0.3644	0.169				2241	1982	4508	0.000570848	1.07e-07	7.01624	6.44539	0.0564107	1.08857	6.393	3.05729	13.4616	15.296
2021-03-22	0-309	O3	0.6747	0.3272				2510	2363	4986	0.00087659	5.11e-07	10.4096	11.0585	0.0531394	0.941321	9.74342	3.35129	21.468	21.4719
2021-03-22	0-310	O3	0.5259	0.2476				2595	2311	4978	0.000795682	2.75e-07	10.398	10.0073	0.0831992	1.03905	8.50914	3.69471	20.4053	19.4748
2021-03-22	0-311	O3	0.5023	0.2372				2464	2465	4983	0.000397731	1.52e-07	11.4367	11.7359	0.0495571	0.974505	9.9942	3.46717	23.1726	21.8242
2021-03-22	0-312	O3	0.5234	0.2486				2578	2378	4972	0.00103066	2.73e-07	11.4232	10.6172	0.077928	1.07592	9.22513	3.69188	22.0403	20.7681
2021-03-22	0-313	O3	0.5687	0.268				2428	2397	4976	0.000789481	1.85e-07	11.087	11.8109	0.049763	0.938715	9.79123	3.65906	22.8979	21.6202
2021-03-22	0-314	O3	0.5887	0.2742				2426	2288	4927	0.000453379	1.18e-07	11.1529	11.3584	0.0507968	0.98191	9.45304	3.63351	22.5113	21.3569
2021-03-22	0-315	O3	0.3876	0.1789				2521	2443	4972	0.00178522	3.55e-07	9.74532	7.96095	0.138578	1.22414	8.45849	3.18705	17.7063	19.0053
2021-03-22	0-316	O3	0.5005	0.2395				2433	2346	4987	0.001457	3.86e-07	8.60615	10.0623	0.109414	0.855287	8.55681	3.36071	18.6684	19.2633
2021-03-22	0-317	O3	0.4885	0.2376				2435	2365	4971	0.000337496	8.71e-08	9.74248	9.46723	0.0306834	1.02907	8.60872	3.33285	19.2097	19.5076
2021-03-22	0-318	O3	1.0084	0.4837				2567	2405	4987	0.0010687	9.64e-07	16.2661	17.0662	0.0652694	0.953117	11.6919	4.15285	33.3323	25.8355
2021-03-22	0-319	O3	0.2934	0.1366				2386	2253	4644	0.000926037	4.65e-07	5.80161	6.68863	0.125146	0.867383	7.30366	2.66187	12.4902	16.1266
2021-03-22	0-320	O3	0.7538	0.3467				2606	2335	4981	0.000438883	2.16e-07	13.8908	13.9341	0.0345709	0.996887	10.6162	3.94342	27.8249	23.7043
2021-03-22	0-321	O3	0.7203	0.343				2504	2380	4982	0.000783856	2.79e-07	11.558	11.7833	0.0773042	0.980877	9.8217	3.80043	23.3414	22.001
2021-03-22	0-322	O3	0.4642	0.2156				2471	2263	4977	0.000862888	3.63e-07	9.1682	9.95257	0.0630064	0.921189	8.34805	3.58418	19.1208	18.9972
2021-03-22	0-323	O3	0.4582	0.2221				2507	2455	4983	0.00269013	1.06e-06	10.8734	8.20129	0.211527	1.32581	9.29658	3.21862	19.0747	20.5336
2021-03-22	0-324	O3	0.5405	0.2618				2536	2414	4985	0.000692085	1.11e-07	9.17643	9.24041	0.0848725	0.993077	7.8191	3.65045	18.4168	18.0826
2021-03-22	0-325	O3	0.7528	0.3554				2579	2304	4993	0.00177845	9.75e-07	13.7605	12.2116	0.101653	1.12683	9.83849	3.91944	25.9721	22.1773
2021-03-22	0-326	O3	0.7837	0.3698				2525	2421	4985	0.0011177	4.06e-07	14.1486	13.4915	0.0608652	1.0487	10.093	4.08992	27.6401	22.9045
2021-03-22	0-327	O3	0.8517	0.4015				2489	2451	4973	0.00172113	4.11e-07	15.2797	15.4538	0.0977517	0.988733	10.5206	4.36364	30.7335	23.8783
2021-03-22	0-328	O3	0.419	0.2104				2508	2363	4973	0.000910508	3.81e-07	7.64817	7.16729	0.137978	1.06709	8.48657	2.83901	14.8155	18.4698
2021-03-22	0-329	O3	0.3151	0.152				2269	2180	4490	0.00158897	2.45e-07	5.23696	6.82593	0.16672	0.767216	6.9345	2.66004	12.0629	15.4375
2021-03-22	0-330	O3	0.4624	0.2208				2611	2406	5010	0.00141159	4.32e-07	7.70856	9.07721	0.158068	0.849222	8.60486	3.12696	16.7858	19.1278
2021-03-22	0-331	O3	0.7678	0.3451				2563	2408	4989	0.00175507	8.79e-07	15.4899	14.0023	0.0927084	1.10624	10.8457	4.12926	29.4922	24.2051
2021-03-22	0-332	O3	0.6225	0.283				2498	2350	4975	0.00231459	1.56e-06	14.9055	12.6074	0.104305	1.18229	10.3748	4.06015	27.5129	23.3508
2021-03-22	0-333	O3	0.5177	0.2443				2379	2388	4977	0.00275736	2.23e-06	9.69654	12.3157	0.144692	0.787333	9.00224	3.68345	22.0122	20.4147
2021-03-22	0-334	O3	0.4943	0.2418				2487	2495	4994	0.00275012	1.88e-06	12.2909	9.5592	0.121374	1.28577	9.60809	3.29471	21.8501	21.0303
2021-03-22	0-335	O3	0.4071	0.1886				2433	2293	4823	0.00164793	4.53e-07	8.52674	6.91042	0.125714	1.2339	7.31147	3.0509	15.4372	16.6977
2021-03-22	0-336	O3	0.4122	0.1908				2557	2326	4982	0.0018082	3.88e-07	9.09696	7.30421	0.13304	1.24544	7.56904	3.2935	16.4012	17.3384
2021-03-22	0-337	O3	0.4472	0.219				2622	2349	4991	0.00225724	4.98e-07	10.1185	7.86258	0.159976	1.28692	8.62938	3.1679	17.9811	19.3823
2021-03-22	0-338	O3	0.8015	0.3863				2503	2408	4975	0.00108039	5.42e-07	12.9447	13.4254	0.0935178	0.9642	10.7514	3.96183	26.3701	23.7659
2021-03-22	0-339	O3	0.3862	0.1877				2496	2310	4988	0.000386177	1.4e-07	7.90436	7.903	0.0420126	1.00017	8.43536	2.8297	15.8074	18.6754
2021-03-22	0-340	O3	0.2858	0.1336				2035	2043	4094	0.000582543	1.3e-07	5.83406	5.85538	0.0925058	0.996359	6.02065	2.85289	11.6894	14.149
2021-03-22	0-341	O3	0.6726	0.3303				2595	2375	4994	0.000962557	2.89e-07	13.272	12.6723	0.0510426	1.04732	10.351	3.87454	25.9443	23.1982
2021-03-22	0-342	O3	0.3702	0.1791				2597	2372	4989	0.000753102	1.41e-07	6.66948	7.21327	0.0886652	0.924612	8.29682	2.71869	13.8828	18.3775
2021-03-22	0-343	O3	0.3328	0.1564				2578	2402	4993	0.00250926	6.89e-07	5.54314	8.03513	0.228769	0.689864	7.38727	2.91358	13.5783	16.8602
2021-03-22	0-344	O3	0.561	0.2667				2588	2386	4984	0.000705603	1.67e-07	8.7147	9.38246	0.073302	0.928829	8.09113	3.32401	18.0972	18.3801
2021-03-22	0-345	O3	0.4825	0.2311				2419	2404	4987	0.0021208	2.25e-07	6.50982	8.63058	0.206679	0.754273	8.06738	3.00945	15.1404	17.85
2021-03-22	0-346	O3	0.4389	0.2056				2478	2429	4992	0.000532001	1.02e-07	9.35687	8.83902	0.0320889	1.05859	8.10545	3.34764	18.1959	18.3375
2021-03-22	0-347	O3	0.2338	0.1085				2238	2171	4534	0.0013178	2.43e-07	6.18931	4.95568	0.159505	1.24893	7.04657	2.42583	11.145	15.5208
2021-03-22	0-348	O3	0.6944	0.3288				2464	2450	4989	0.00191857	7.78e-07	11.1903	13.1084	0.104228	0.853671	9.57931	3.79713	24.2987	21.585
2021-03-22	0-349	O3	0.5502	0.2724				2571	2292	4989	0.00188053	1.41e-06	11.3679	9.74841	0.140414	1.16613	8.41339	3.8743	21.1163	19.6831
2021-03-22	0-350	O3	0.3295	0.1595				2566	2295	4887	0.000576361	8.94e-08	6.9975	6.5522	0.0639781	1.06796	7.44637	2.81263	13.5497	16.5768
2021-03-22	0-351	O3	0.5735	0.2773				2454	2344	4988	0.000694076	3.63e-07	10.6911	11.2063	0.0485724	0.954032	9.65434	3.59932	21.8974	21.4432
2021-03-22	0-352	O3	0.6475	0.3165				2620	2353	4986	0.00156115	4.52e-07	11.9038	10.3549	0.077976	1.14958	9.73967	3.40273	22.2587	22.1978
2021-03-22	0-353	O3	0.26					1969	1882	3896	0.00161048	1.88e-07	3.92951	5.53995	0.214396	0.709304	5.91944	2.49118	9.46946	13.5036
2021-03-22	0-354	O3	0.6714	0.318				2583	2353	4986	0.0015912	2.21e-07	12.1065	13.6976	0.097961	0.883837	10.6571	3.85087	25.8041	23.5829
2021-03-22	0-355	O3	0.2361	0.1212				2032	2022	4168	0.00126917	2.58e-07	6.58927	5.37808	0.132473	1.22521	6.65606	2.72473	11.9673	14.9071
2021-03-22	0-356	O3	0.4245	0.2103				2495	2426	4984	0.000581683	1.95e-07	8.72605	8.59645	0.0710845	1.01508	8.0406	3.24932	17.3225	18.356
2021-03-22	0-357	O3	0.4396	0.2161				2515	2335	4987	0.00289977	2.19e-06	9.83057	6.94114	0.176843	1.41627	7.91931	3.25805	16.7717	18.2325
2021-03-22	0-358	O3	0.3248	0.1614				2058	2046	4145	0.00048977	5.99e-08	6.28823	6.77794	0.0775013	0.927751	6.19789	3.19414	13.0662	14.717
2021-03-22	0-359	O3	0.6918	0.3275				2486	2338	4982	0.00145666	4.6e-07	13.2221	11.9453	0.0866405	1.10689	10.3225	3.762	25.1674	22.9081
2021-03-22	0-360	O3	0.4727	0.233				2556	2330	4969	0.00140455	8.69889e-07	7.8198	9.09297	0.107387	0.859983	8.21273	3.20552	16.9128	18.5146
2021-03-22	0-361	O3	0.4388	0.2151				2501	2317	4987	0.00137162	3.73e-07	7.18063	8.53024	0.100663	0.841786	7.8066	3.2012	15.7109	17.5488
2021-03-22	0-362	O3	0.7177	0.3413				2523	2353	4980	0.000893392	3e-07	13.1422	12.9048	0.0565522	1.01839	9.75831	3.77807	26.047	22.113
2021-03-22	0-363	O3	0.4001	0.187				2631	2270	4994	0.00068906	2.08e-07	8.23533	7.58382	0.0454175	1.08591	8.29961	2.95515	15.8191	18.6005
2021-03-22	0-364	O3	0.4253	0.2023				2478	2487	4985	0.00168159	5.92e-07	9.26406	7.67843	0.107175	1.2065	7.89905	3.15904	16.9425	18.0066
2021-03-22	0-365	O3	0.571	0.2687				2481	2340	4985	0.000395514	8.71e-08	10.8951	11.1761	0.0360473	0.974857	9.31805	3.5554	22.0713	21.1058
2021-03-22	0-366	O3	0.4448	0.2088				2525	2447	4990	0.00115323	2.13e-07	9.01258	10.1585	0.0723492	0.887198	8.41643	3.39835	19.1711	18.8769
2021-03-22	0-367	O3	0.3826	0.1762				2405	2364	4970	0.000338683	4.01e-08	8.01853	7.89573	0.0396116	1.01555	7.44427	3.12276	15.9143	17.0816
2021-03-22	0-368	O3	0.4693	0.2146				2446	2326	4987	0.00195794	6.61e-07	8.33411	10.2598	0.152058	0.812308	8.38017	3.18396	18.5939	18.9159
2021-03-22	0-369	O3	0.637	0.3074				2537	2376	4977	0.00111597	5.21e-07	12.8221	11.7402	0.0492627	1.09215	9.63201	3.84144	24.5623	21.6621
2021-03-22	0-370	O3	0.8474	0.4061				2583	2389	4990	0.0003198	8.43e-08	15.0681	15.0781	0.0244965	0.999334	10.9827	4.1859	30.1462	24.5608
2021-03-22	0-371	O3	0.3304	0.156				2339	2281	4880	0.00123916	3.67e-07	6.40009	7.59597	0.104011	0.842563	7.24306	2.90145	13.9961	16.4831
2021-03-22	0-372	O3	0.7173	0.3531				2498	2448	4979	0.000642293	2.49e-07	12.8056	12.4241	0.0345418	1.03071	9.70124	3.89544	25.2297	21.9239
2021-03-22	0-373	O3	0.5008	0.2352				2504	2396	4988	0.000699985	3.43e-07	10.6693	10.942	0.0801765	0.975075	9.54579	3.47342	21.6112	21.2545
2021-03-22	0-374	O3	0.4639	0.225				2596	2371	4978	0.00049676	1.47e-07	8.99827	9.17028	0.0352913	0.981243	9.19213	3.22478	18.1686	20.1813
2021-03-22	0-375	O3	0.3421	0.1731				2599	2344	4982	0.000470739	1.17e-07	7.30001	7.62539	0.0575236	0.95733	7.96518	2.89868	14.9254	17.8862
2021-03-22	0-376	O3	0.3817	0.1861				2511	2363	4992	0.000808049	1.39e-07	7.5873	8.39302	0.0986529	0.904002	7.66899	3.22819	15.9803	17.4305
2021-03-22	0-377	O3	0.6808	0.329				2608	2373	4988	0.000599002	1.42e-07	13.3641	13.6653	0.051181	0.977954	10.4135	3.97913	27.0294	23.4155
2021-03-22	0-378	O3	0.3663	0.1804				2497	2369	4985	0.00055398	1.57e-07	8.78481	8.52882	0.0630497	1.03001	8.00731	3.16232	17.3136	18.0519
2021-03-22	0-379	O3	0.4208	0.2079				2511	2459	4982	0.00124311	3e-07	9.07493	9.07978	0.109588	0.999465	8.82956	3.04801	18.1547	19.4105
2021-03-22	0-380	O3	0.412	0.213				2455	2244	4914	0.000478109	7.57e-08	7.24455	7.66228	0.0485728	0.945482	7.42848	3.01198	14.9068	16.8312
2021-03-22	0-381	O3	0.3932	0.2011				2547	2406	4952	0.00147317	2.05e-07	7.13663	8.60979	0.132778	0.828896	7.44862	3.34849	15.7464	17.0782
2021-03-22	0-382	O3	0.5081	0.2379				2415	2487	4971	0.00337398	3.24e-06	7.22114	10.5676	0.245307	0.683326	7.76786	3.52766	17.7888	18.2196
2021-03-22	0-383	O3	0.5463	0.2563				2451	2311	4963	0.000719978	1.89e-07	12.4026	11.9138	0.0622648	1.04102	10.0425	3.71588	24.3164	22.4153
2021-03-22	0-384	O3	0.4544	0.2087				2496	2340	4989	0.00166363	6.58e-07	8.36465	10.0055	0.106184	0.836006	8.78722	3.21072	18.3701	19.3802
2021-03-22	0-385	O3	0.5129					2467	2301	4987	0.00138926	6.63e-07	8.78558	10.1567	0.0915325	0.865006	9.00656	3.30859	18.9422	19.8056
2021-03-22	0-386	O3	0.3886	0.1805				2563	2401	4990	0.00384705	2.11e-06	6.67466	10.5217	0.260094	0.63437	8.54572	3.17098	17.1964	19.0383
2021-03-22	0-387	O3	0.5399	0.2515				2578	2285	4982	0.00162383	8.64e-07	9.32377	10.9046	0.0794505	0.85503	9.28163	3.41619	20.2284	20.5218
2021-03-22	0-388	O3	0.7229	0.344				2560	2362	4980	0.00160257	6.89e-07	11.3478	12.9502	0.0919277	0.87626	9.87962	3.75243	24.298	22.119
2021-03-22	0-389	O3	0.5283	0.2557				2465	2465	4981	0.000810737	2.44e-07	9.44839	9.91241	0.114796	0.953188	9.64691	3.13784	19.3608	20.9335
2021-03-22	0-390	O3	0.6496	0.2968				2571	2391	4973	0.000854605	1.47e-07	11.5407	12.3875	0.062592	0.931638	9.72772	3.69701	23.9282	21.8787
2021-03-22	0-391	O3	0.4863	0.239				2511	2335	4985	0.000892423	1.11e-07	8.77249	7.95672	0.0721368	1.10253	8.11477	3.28191	16.7292	18.4235
2021-03-22	0-393	O3	0.4886	0.2386				2531	2437	4982	0.0033229	1.24e-06	7.31269	10.6355	0.241673	0.687576	8.79498	3.19514	17.9481	19.3174
2021-03-22	0-394	O3	0.5193	0.2498				2505	2359	4995	0.000442878	1.27e-07	9.41599	9.39934	0.0542068	1.00177	8.35508	3.38214	18.8153	19.0001
2021-03-22	0-395	O3	0.567	0.251				2562	2382	4986	0.00117335	7.67e-07	10.1744	11.1231	0.0974765	0.914705	9.21044	3.64708	21.2975	20.6598
2021-03-22	0-396	O3	0.4483	0.2101				2493	2432	4956	0.00067921	9.29e-08	8.34576	9.02122	0.0530152	0.925125	7.71774	3.12376	17.367	17.6159
2021-03-22	0-397	O3	0.6349	0.3004				2623	2322	4988	0.00241809	5.44e-07	13.2976	10.8795	0.118149	1.22226	8.83721	3.94394	24.177	20.4426
2021-03-22	0-398	O3	0.3705	0.1843				2625	2273	4975	0.00215082	8.33e-07	8.84078	6.69022	0.163095	1.32145	7.61712	3.23067	15.531	17.5898
2021-03-22	0-399	O3	0.4403	0.2099				2496	2387	4958	0.00117408	2.61e-07	8.17008	7.07042	0.105318	1.15553	7.34172	3.11096	15.2405	16.8659
2021-03-22	0-400	O3	0.9123	0.4377				2569	2309	4992	0.00056541	1.5e-07	14.7461	14.7568	0.0546393	0.999277	10.7842	4.15974	29.5029	24.1396
2021-03-22	0-401	O3	0.4427	0.2211				2579	2353	4983	0.000755017	2.09e-07	8.92777	8.18149	0.0624557	1.09122	8.66485	3.14076	17.1093	19.1633
2021-03-22	0-403	O3	0.6064	0.2935				2543	2442	4988	0.00107259	1.51e-07	11.1355	12.0782	0.0694132	0.921951	9.28547	3.71728	23.2137	20.8464
2021-03-22	0-404	O3	0.4436	0.2171				2514	2332	5007	0.00079465	3.04e-07	8.71798	9.50085	0.0546713	0.917601	8.88053	3.1506	18.2188	19.5574
2021-03-22	0-405	O3	0.475	0.2317				2454	2334	4993	0.000790363	1.4e-07	9.04627	9.72336	0.064271	0.930365	8.60585	3.29287	18.7696	19.3975
2021-03-22	0-406	O3	0.6977	0.3263				2569	2327	4972	0.00109232	4.33e-07	13.7304	12.8199	0.0517943	1.07103	10.5977	3.8212	26.5503	23.4359
2021-03-22	0-407	O3	0.4156	0.2006				2488	2263	4972	0.00107788	1.01e-07	7.89874	8.97638	0.102006	0.879947	7.8548	3.33006	16.8751	17.9646
2021-03-22	0-408	O3	0.2386	0.1127				2438	2278	4742	0.00221295	1.17e-06	6.56264	4.40997	0.220552	1.48814	7.41678	2.39237	10.9726	16.0591
2021-03-22	0-409	O3	0.4945	0.2485				2466	2317	4983	0.00122011	3.73e-07	8.92437	10.0332	0.0928988	0.88948	8.00615	3.63962	18.9576	18.4379
2021-03-22	0-410	O3	0.5591	0.2739				2479	2422	4977	0.00174847	1.54e-06	11.0134	9.72535	0.14347	1.13244	8.96486	3.45668	20.7388	20.3038
2021-03-22	0-411	O3	0.6072	0.2925				2546	2417	4989	0.000902218	5.03e-07	12.8827	12.8904	0.0645841	0.999408	10.3065	3.82015	25.7731	23.0553
2021-03-22	0-412	O3	0.4916	0.2359				2486	2325	4980	0.000383046	5.91e-08	9.38319	9.03499	0.0262327	1.03854	8.28632	3.32396	18.4182	18.8163
2021-03-22	0-413	O3	0.4098	0.1888				2467	2363	4974	0.000427381	6.12e-08	8.85003	8.75837	0.035532	1.01047	8.21318	3.18893	17.6084	18.5669
2021-03-22	0-414	O3	0.2849	0.1421				2307	2066	4520	0.000787072	2.7e-07	5.00136	5.77016	0.098381	0.866764	7.06976	2.42251	10.7715	15.5257
2021-03-22	0-415	O3	0.3849	0.1969				2545	2430	5002	0.000262262	5.33e-08	7.94321	8.0658	0.0348781	0.984802	8.26083	2.95514	16.009	18.3371
2021-03-22	0-416	O3	0.3097	0.1576				2436	2182	4711	0.000377558	6.91e-08	6.06998	5.76439	0.0419156	1.05301	7.34459	2.69125	11.8344	16.1335
2021-03-22	0-417	O3	0.5952	0.2966				2578	2379	4989	0.00095774	9.82e-08	9.70946	10.5418	0.0765928	0.921043	8.49732	3.55362	20.2513	19.3851
2021-03-22	0-418	O3	0.6008	0.3175				2571	2356	4980	0.00141023	3.64e-07	11.1134	9.97169	0.104582	1.1145	8.54216	3.77864	21.0851	19.5155
2021-03-22	0-419	O3	0.3354	0.1649				2404	2205	4695	0.00118333	9.63e-08	6.13172	7.31505	0.134339	0.838234	7.13525	2.88649	13.4468	16.0759
2021-03-22	0-420	O3	0.2452	0.116				2138	1947	4225	0.00022121	2.54e-08	5.53904	5.43977	0.038413	1.01825	6.33718	2.51879	10.9788	14.4723
2021-03-15	3-002	N3	0.3109	0.0887				2632	2271	4953	0.000945221	3.01855e-07	7.89837	6.99319	0.0810396	1.12944	7.82056	2.81734	14.8916	18.0616
2021-03-15	3-006	N3	0.2799	0.076				2679	2106	4972	0.000397509	6.80042e-08	6.58316	6.96026	0.0584879	0.94582	7.1805	2.87447	13.5434	17.0344
2021-03-15	3-007	N3	0.3586	0.0981				2683	2293	4989	0.00148549	1.81533e-07	7.65349	9.13886	0.119529	0.837466	8.39593	2.91227	16.7923	19.4807
2021-03-15	3-008	N3	0.2177	0.0601				2550	2058	4618	0.000450539	6.93658e-08	4.88573	5.33469	0.0733115	0.915841	6.47878	2.42421	10.2204	15.033
2021-03-15	3-009	N3	0.2755	0.0746				2758	2162	4947	0.00117461	2.75074e-07	5.84766	7.02224	0.132253	0.832734	7.1201	2.6704	12.8699	16.5276
2021-03-15	3-010	N3	0.2588	0.0681				2550	2257	4817	0.0011523	3.26234e-07	5.74682	6.89892	0.116326	0.833003	6.48989	2.77232	12.6457	15.6124
2021-03-15	3-011	N3	0.2896	0.0778				2580	2257	4964	0.000486555	5.03888e-08	6.35294	6.8368	0.0440836	0.929227	7.00018	2.70967	13.1897	16.346
2021-03-15	3-012	N3	0.3224	0.0844				2602	2245	4948	0.000636789	6.92646e-08	7.03581	7.66557	0.0622599	0.917847	7.4494	2.80558	14.7014	17.5452
2021-03-15	3-013	N3	0.2385	0.0644				2456	2113	4597	0.00068647	1.67661e-07	5.7687	5.12264	0.0684657	1.12612	6.17522	2.48564	10.8913	14.654
2021-03-15	3-014	N3	0.2048	0.0537				2243	1957	4322	0.000854845	1.55389e-07	5.20575	4.351	0.0936194	1.19645	6.23071	2.27363	9.55675	14.1556
2021-03-15	3-015	N3	0.185	0.0504				2489	1993	4500	0.000188955	1.15921e-08	4.17592	4.35771	0.0422145	0.958281	6.00351	2.21578	8.53363	13.9897
2021-03-15	3-016	N3	0.2018	0.0554				2352	2087	4467	0.000606772	1.20117e-07	4.34658	4.95163	0.0835886	0.877808	6.03353	2.35952	9.29821	14.1113
2021-03-15	3-018	N3	0.2044	0.0561				2103	1741	4038	0.000190027	1.91287e-08	4.84538	4.66618	0.0291428	1.0384	5.65297	2.48213	9.51155	13.3251
2021-03-15	3-020	N3	0.1699	0.0498				2152	1731	3914	0.000205271	1.77346e-08	4.15258	3.99227	0.0438429	1.04016	5.52961	2.24692	8.14485	12.992
2021-03-15	3-021	N3	0.2079	0.059				2376	2060	4480	0.000597418	9.56477e-08	5.27739	4.7076	0.0607784	1.12104	6.06898	2.3743	9.98499	14.2612
2021-03-15	3-023	N3	0.2309	0.0645				2480	2146	4761	0.0006343	9.51858e-08	5.76085	5.26619	0.0780587	1.09393	6.18289	2.57017	11.027	14.8574
2021-03-15	3-024	N3	0.1653	0.0461				2119	1836	4120	0.000467495	1.89912e-07	3.8431	4.10827	0.100373	0.935455	5.64382	2.2201	7.95137	13.2941
2021-03-15	3-025	N3	0.1714	0.0469				1872	1597	3640	0.00032537	5.20501e-08	4.15155	3.85391	0.0566638	1.07723	4.88919	2.26722	8.00546	12.0225
2021-03-15	3-026	N3	0.1985	0.0559				2266	1817	4328	0.000235848	2.23526e-08	4.66911	4.82046	0.04474	0.968601	5.88766	2.49766	9.48957	13.9858
2021-03-15	3-028	N3	0.239	0.0635				2563	2066	4733	0.000997254	1.32741e-07	5.29359	6.29019	0.103221	0.841563	6.4948	2.62012	11.5838	15.261
2021-03-15	3-032	N3	0.3619	0.0935				2684	2301	4990	0.000571384	6.74976e-08	8.95261	8.43105	0.0416087	1.06186	7.89555	3.16178	17.3837	19.2073
2021-03-15	3-033	N3	0.3194	0.091				2607	2302	4966	0.00110292	2.8991e-07	8.16964	7.12992	0.0978981	1.14582	7.67378	2.96418	15.2996	18.2722
2021-03-15	3-034	N3	0.3558	0.0917				2508	2304	4989	0.000511791	1.69034e-07	8.92841	8.52964	0.0389815	1.04675	7.82075	3.12127	17.4581	18.7216
2021-03-15	3-035	N3	0.3621	0.0927				2650	2314	4974	0.000246122	3.14319e-08	8.7263	8.56866	0.0201385	1.0184	7.71287	3.1648	17.295	18.6604
2021-03-15	3-036	N3	0.1878	0.0514				2164	1767	4050	0.000204224	1.56522e-08	4.63073	4.69764	0.0310355	0.985756	5.2877	2.40439	9.32837	13.1969
2021-03-15	3-037	N3	0.2404	0.0666				2827	2133	4978	0.000483032	7.25991e-08	5.86197	5.9785	0.0754628	0.980509	6.54624	2.57953	11.8405	16.0581
2021-03-15	3-038	N3	0.2093	0.0583				2474	2136	4782	0.00144489	4.79186e-07	4.46654	5.91122	0.156048	0.755604	5.98082	2.56002	10.3778	14.7988
2021-03-15	3-039	N3	0.2036	0.0576				2565	1948	4546	0.000654409	3.77608e-07	5.23238	4.71054	0.0949633	1.11078	6.02895	2.44452	9.94292	14.5654
2021-03-15	3-040	N3	0.2169	0.0609				2481	2072	4726	0.000441653	4.34552e-08	5.02352	5.46252	0.0692133	0.919635	6.30623	2.50937	10.486	14.9386
2021-03-15	3-041	N3	0.2281	0.0642				2560	2282	4960	0.00103826	2.98751e-07	5.02978	6.06121	0.104504	0.829831	5.99647	2.56668	11.091	15.1127
2021-03-15	3-042	N3	0.1447	0.04				1816	1711	3708	0.00024277	2.86952e-08	3.76934	3.64376	0.0465342	1.03446	5.62282	2.048	7.41311	12.6762
2021-03-15	3-043	N3	0.2084	0.0579				2411	2078	4495	0.000261592	2.05112e-08	5.2648	5.03177	0.0395012	1.04631	6.38236	2.45892	10.2966	14.7051
2021-03-15	3-045	N3	0.2148	0.0595				2318	1993	4511	0.000416597	8.52865e-08	5.53213	5.27667	0.0671705	1.04841	6.28837	2.59031	10.8088	14.7316
2021-03-15	3-046	N3	0.2587	0.0735				2703	2222	4950	0.000266557	2.80572e-08	6.31041	6.51197	0.0245738	0.969047	6.55995	2.82044	12.8224	15.8396
2021-03-15	3-047	N3	0.1777	0.0524				2091	1772	3883	0.000300734	3.00939e-08	4.13203	3.84441	0.0461231	1.07481	5.1978	2.19772	7.97644	12.6143
2021-03-15	3-048	N3	0.4729	0.1218				2596	2325	4977	0.00134403	1.53196e-06	12.2971	11.233	0.0912455	1.09472	9.79918	3.40923	23.5301	22.4803
2021-03-15	3-049	N3	0.4216	0.1041				2463	2413	4982	0.00318034	1.15297e-06	9.1751	12.3554	0.160456	0.742596	8.94361	3.36069	21.5305	20.7731
2021-03-15	3-050	N3	0.2426	0.0646				2597	2220	4964	0.000697441	2.41713e-07	6.16638	6.85026	0.0685406	0.900167	7.46727	2.76363	13.0166	17.011
2021-03-15	3-051	N3	0.1779	0.0499				2606	2232	4920	0.000317415	3.74968e-08	4.86555	4.76744	0.063053	1.02058	6.98821	2.26353	9.63299	15.5833
2021-03-15	3-052	N3	0.3416	0.0916				2631	2305	4965	0.000491895	1.78675e-07	8.68013	8.28729	0.0607757	1.0474	8.24907	3.04212	16.9674	19.2266
2021-03-15	3-053	N3	0.3567	0.091				2598	2361	4975	0.002387	3.68276e-07	10.4052	8.01817	0.16671	1.2977	8.52085	3.14491	18.4234	19.7876
2021-03-15	3-055	N3	0.1663	0.0465				1927	1804	3747	0.000425418	6.43422e-08	4.3427	4.05613	0.072952	1.07065	5.83848	2.16475	8.39883	13.0324
2021-03-15	3-056	N3	0.2097	0.0596				1892	1826	3775	0.00165173	1.5015e-07	3.66356	5.31529	0.215188	0.689249	5.15667	2.37328	8.97885	12.6151
2021-03-15	3-057	N3	0.1732	0.0482				1892	1826	3775	0.00165173	1.5015e-07	3.66356	5.31529	0.215188	0.689249	5.15667	2.37328	8.97885	12.6151
2021-03-15	3-058	N3	0.2381	0.0694				2366	2151	4532	0.00122291	1.01191e-07	5.28816	6.50871	0.142214	0.812474	6.73677	2.58694	11.7969	15.2515
2021-03-15	3-059	N3	0.1779	0.0473				1980	1868	3867	0.00079528	2.3014e-07	4.20323	4.9959	0.101376	0.841336	5.65959	2.36873	9.19914	13.1582
2021-03-15	3-061	N3	0.2541	0.071				2599	2262	4975	0.000560466	7.62715e-08	6.09971	5.87489	0.0854922	1.03827	6.74935	2.70648	11.9746	15.879
2021-03-15	3-064	N3	0.2846	0.079				2696	2242	4941	0.000244813	1.84231e-08	6.68005	6.78807	0.0287068	0.984086	7.17256	2.94388	13.4681	16.8052
2021-03-15	3-065	N3	0.4539	0.1246				2727	2179	4964	0.00298365	9.56479e-07	12.2535	9.27444	0.160288	1.32122	8.70238	3.53801	21.528	20.8112
2021-03-15	3-067	N3	0.3933	0.1064				2646	2204	4960	0.000564178	2.8368e-07	9.35844	9.31069	0.050947	1.00513	7.68436	3.33328	18.6691	18.7865
2021-03-15	3-068	N3	0.19	0.055				2551	1952	4519	0.000783772	1.8187e-07	4.75699	5.02743	0.15628	0.946209	6.22842	2.40763	9.78442	14.5433
2021-03-15	3-069	N3	0.146	0.0413				2191	1825	4046	0.000415719	1.03516e-07	3.92358	3.98057	0.119699	0.985682	5.8536	2.11991	7.90415	13.3519
2021-03-15	3-070	N3	0.2292	0.065				2643	2201	4982	0.000817759	4.76457e-08	5.30733	6.12382	0.104498	0.866669	6.78722	2.60896	11.4311	15.7881
2021-03-15	3-071	N3	0.2307	0.0641				2490	2276	4976	0.000762655	1.11598e-07	6.17621	5.47005	0.0809112	1.1291	6.90148	2.54504	11.6463	15.9812
2021-03-15	3-072	N3	0.2366	0.0638				2403	2220	4948	0.000222286	1.94415e-08	6.07185	5.96148	0.0317595	1.01851	6.78635	2.46478	12.0333	15.7644
2021-03-15	3-073	N3	0.264	0.0724				2567	2363	4978	0.00188026	3.76064e-07	5.85636	7.73639	0.161515	0.756989	7.18044	2.67108	13.5927	16.7066
2021-03-15	3-074	N3	0.2546	0.0715				2690	2265	4983	0.000867284	1.30324e-07	5.98397	6.85083	0.0953996	0.873466	7.18988	2.62925	12.8348	16.6658
2021-03-15	3-075	N3	0.222	0.0629				1928	1793	3920	0.000319032	3.88904e-08	5.06542	5.17064	0.0663944	0.979651	5.60492	2.52267	10.2361	13.3146
2021-03-15	3-076	N3	0.1989	0.0574				2357	2083	4456	0.000457968	7.05357e-08	5.14369	4.74133	0.0715173	1.08486	6.32174	2.3924	9.88502	14.561
2021-03-15	3-077	N3	0.2878	0.0796				2501	2196	4965	0.000193723	1.67229e-08	6.81114	6.88438	0.0313225	0.989362	7.31209	2.82059	13.6955	17.2252
2021-03-15	3-079	N3	0.2133	0.0607				2455	2067	4664	0.000541966	1.15562e-07	4.99856	5.45422	0.0871653	0.916457	6.43436	2.53	10.4528	14.9585
2021-03-15	3-080	N3	0.179	0.0488				2418	2097	4569	0.000395281	2.73106e-08	4.96549	4.57321	0.067831	1.08578	6.7168	2.24595	9.5387	14.856
2021-03-15	3-081	N3	0.2935	0.0972				2573	2248	4969	0.000445309	1.1883e-07	7.04783	6.93083	0.0551596	1.01688	7.14233	2.80886	13.9787	17.1374
2021-03-15	3-082	N3	0.2181	0.0639				2251	1986	4272	0.000527437	2.46792e-08	5.10661	5.63358	0.0752744	0.906459	6.29083	2.62127	10.7402	14.4022
2021-03-15	3-083	N3	0.2074	0.0608				2089	1822	4147	0.000460551	1.01421e-07	5.31323	4.92683	0.0678495	1.07843	6.1081	2.50614	10.2401	14.0032
2021-03-15	3-085	N3	0.2334	0.0633				2700	2224	4929	0.000357461	1.50177e-07	6.1567	6.01384	0.0615453	1.02376	6.82515	2.70429	12.1705	15.8307
2021-03-15	3-086	N3	0.2443	0.0705				2640	2017	4676	0.00122037	6.23623e-07	6.61529	5.43986	0.127311	1.21608	6.46811	2.73817	12.0551	15.2748
2021-03-15	3-088	N3	0.1734	0.0489				2166	1870	4058	0.000908107	1.14251e-07	3.75887	4.66678	0.153559	0.805452	6.04314	2.24614	8.42565	13.6232
2021-03-15	3-089	N3	0.3084	0.0827				2714	2187	4981	0.000788563	1.51772e-07	8.27865	7.49308	0.069234	1.10484	8.0032	2.89831	15.7717	18.1475
2021-03-15	3-090	N3	0.3505	0.0916				2501	2333	4987	0.00118702	3.84037e-07	8.04161	9.21789	0.0715301	0.872391	8.12607	3.08097	17.2595	18.5504
2021-03-15	3-091	N3	0.3165	0.0817				2587	2195	4976	0.000685982	1.35809e-07	7.84343	7.17753	0.0579497	1.09278	6.93486	3.10304	15.021	16.9416
2021-03-15	3-092	N3	0.3349	0.0929				2690	2223	4968	0.00159409	1.41113e-06	8.99036	7.43984	0.11409	1.20841	7.21739	3.28836	16.4302	17.6637
2021-03-15	3-093	N3	0.195	0.0545				2373	2130	4647	0.000283197	4.15299e-08	4.63687	4.71747	0.0459502	0.982914	6.43857	2.34186	9.35434	14.846
2021-03-15	3-094	N3	0.2701	0.0755				2559	2329	4970	0.00072217	4.56792e-08	6.07769	6.79947	0.0740291	0.893847	6.90135	2.85741	12.8772	16.1634
2021-03-15	3-095	N3	0.208	0.0624				2451	2013	4501	0.000741138	1.86575e-07	5.22615	4.63135	0.114187	1.12843	6.26314	2.33448	9.8575	14.5311
2021-03-15	3-097	N3	0.2661	0.0769				2684	2236	4982	0.000909365	1.54205e-07	6.8036	5.9077	0.0935247	1.15165	7.03038	2.58405	12.7113	16.4112
2021-03-15	3-099	N3	0.2604	0.0759				2684	2078	4936	0.00127006	3.90816e-07	6.91242	5.64236	0.122563	1.22509	6.72899	2.51789	12.5548	15.8919
2021-03-15	3-100	N3	0.2709	0.079				2595	2261	4972	0.000471448	9.18299e-08	6.12583	6.56058	0.0613744	0.933733	7.17524	2.57077	12.6864	16.7146
2021-03-15	3-103	N3	0.3344	0.0931				2679	2289	4970	0.00110008	1.09705e-06	8.74078	7.81696	0.0922219	1.11818	7.51819	3.06719	16.5577	18.0284
2021-03-15	3-104	N3	0.2124	0.0615				2429	1926	4562	0.000477933	2.08803e-07	5.49076	5.11244	0.0778781	1.074	6.44643	2.49412	10.6032	14.9265
2021-03-15	3-105	N3	0.3236	0.0895				2618	2268	4973	0.00116833	3.55989e-07	8.34689	7.1877	0.0761401	1.16127	7.60566	3.0512	15.5346	17.6335
2021-03-15	3-107	N3	0.2075	0.0596				2581	1844	4644	0.000512519	3.28718e-07	5.43413	5.00657	0.0875167	1.0854	6.23978	2.48807	10.4407	15.027
2021-03-15	3-108	N3	0.3053	0.0853				2719	2058	4968	0.00209489	8.45668e-07	8.40805	6.31392	0.159199	1.33167	7.27568	2.86059	14.722	17.2785
2021-03-15	3-109	N3	0.2955	0.0831				2804	2132	4970	0.00048821	8.76118e-08	7.06707	7.18217	0.0801922	0.983974	7.22096	2.99341	14.2492	17.1602
2021-03-15	3-110	N3	0.322	0.091				2653	2229	4951	0.00149721	8.89041e-07	8.57099	7.07565	0.114085	1.21134	7.46347	3.01285	15.6466	17.7272
2021-03-15	3-111	N3	0.2918	0.0834				2635	2319	4977	0.00062732	2.48312e-07	7.60023	7.00184	0.0575757	1.08546	6.99717	2.83363	14.6021	16.8269
2021-03-15	3-112	N3	0.2963	0.0819				2686	2257	4963	0.00162126	1.46285e-06	8.19498	6.71102	0.137512	1.22112	7.28875	2.98102	14.906	17.4434
2021-03-15	3-113	N3	0.1956	0.0562				2379	2012	4418	0.000842172	1.60417e-07	5.20532	4.4122	0.0958586	1.17976	6.29353	2.38333	9.61752	14.3734
2021-03-15	3-115	N3	0.275	0.077				2635	2335	4974	0.000480444	5.40263e-08	6.46191	6.94235	0.0615756	0.930795	7.14453	2.68001	13.4043	16.6151
2021-03-15	3-116	N3	0.2817	0.0815				2612	2282	4973	0.000589048	1.72398e-07	5.83821	6.38459	0.0673029	0.914422	6.83865	2.66785	12.2228	15.9416
2021-03-15	3-117	N3	0.2775	0.0815				2669	2143	4848	0.000690006	1.47346e-07	5.72059	6.40787	0.0766013	0.892745	6.66997	2.70762	12.1285	15.6664
2021-03-15	3-118	N3	0.1883	0.0564				2297	1747	4071	0.00138039	9.8377e-08	4.85426	3.47396	0.217201	1.39733	5.6011	2.26559	8.32823	13.3082
2021-03-15	3-120	N3	0.2049	0.0608				2219	1955	4213	0.00102819	6.84332e-08	4.00471	5.03291	0.197541	0.795706	5.75484	2.35037	9.03762	13.6985
2021-03-15	3-121	N3	0.1869	0.055				1961	1681	3723	0.00118346	2.29613e-07	4.70399	3.54207	0.15136	1.32803	5.24596	2.19782	8.24606	12.4579
2021-03-15	3-122	N3	0.2573	0.068				2594	2353	4972	0.00141234	1.41063e-07	5.54903	6.96137	0.153932	0.797117	7.14121	2.67173	12.5104	16.3375
2021-03-15	3-124	N3	0.1777	0.0469				2262	1773	4076	0.00140201	6.72983e-07	5.1499	3.79665	0.231406	1.35643	6.25931	2.2404	8.94655	13.9399
2021-03-15	3-126	N3	0.2762	0.0688				2607	2341	4965	0.000518503	1.12835e-07	7.05489	7.06602	0.0692524	0.998424	7.04902	2.89273	14.1209	16.4901
2021-03-15	3-127	N3	0.3304	0.0823				2620	2328	4959	0.00128174	3.86978e-07	7.9665	9.1711	0.105784	0.868653	7.8146	3.03968	17.1376	18.2232
2021-03-15	3-128	N3	0.2643	0.0669				2707	2255	4970	0.00144827	2.30861e-07	7.42253	5.97441	0.148842	1.24239	7.40599	2.74574	13.3969	16.8043
2021-03-15	3-129	N3	0.1854	0.0526				2359	1905	4359	0.000365918	3.3263e-08	4.45314	4.31109	0.0846996	1.03295	6.31829	2.22497	8.76423	14.3391
2021-03-15	3-130	N3	0.2064	0.0569				2261	2152	4457	0.000294685	5.79507e-08	4.8028	5.08861	0.0576071	0.943835	6.04769	2.30956	9.89141	14.2343
2021-03-15	3-131	N3	0.217	0.0589				2336	2065	4429	0.00119403	1.54331e-07	5.78313	4.58909	0.130721	1.26019	5.95525	2.41029	10.3722	14.2347
2021-03-15	3-132	N3	0.2195	0.0618				1997	1942	4145	0.000609592	1.62003e-07	5.02551	5.62607	0.0856261	0.893254	6.06878	2.46816	10.6516	14.036
2021-03-15	3-133	N3	0.2181	0.0592				2242	1934	4317	0.000687987	1.13095e-07	5.43186	5.40241	0.119868	1.00545	6.42284	2.64382	10.8343	14.6582
2021-03-15	3-134	N3	0.2218	0.0615				2414	2056	4671	0.000376966	2.80786e-08	5.53594	5.22252	0.0651566	1.06001	6.4705	2.48824	10.7585	14.982
2021-03-15	3-137	N3	0.2021	0.0548				2492	1948	4464	0.000884952	2.51182e-07	4.87676	4.73226	0.164969	1.03054	6.06927	2.45826	9.60902	14.4031
2021-03-15	3-138	N3	0.1835	0.0538				1931	1751	3700	0.000783851	2.39754e-07	3.91712	4.67302	0.129101	0.83824	5.43631	2.25169	8.59014	12.5906
2021-03-15	3-139	N3	0.2278	0.0665				2120	1968	4203	0.000372619	6.17951e-08	5.39515	5.69473	0.0734929	0.947393	6.41961	2.60502	11.0899	14.4974
2021-03-15	3-140	N3	0.1455	0.0398				1869	1694	3679	0.000151374	1.31837e-08	3.82716	3.79425	0.0504015	1.00867	5.7889	2.00352	7.62141	12.7355
2021-03-15	3-141	N3	0.139	0.0388				1802	1589	3514	0.000697056	1.53527e-07	4.08989	3.44216	0.126149	1.18817	5.4955	2.05449	7.53205	12.283
2021-03-15	3-142	N3	0.1382	0.0465				1525	1542	3261	0.000398233	4.51873e-08	3.57818	3.59272	0.071285	0.995954	5.07228	1.97623	7.17089	11.4686
2021-03-15	3-143	N3	0.1335	0.0374				1691	1641	3369	0.000318162	1.24623e-08	3.29035	3.6085	0.0851463	0.911834	5.37453	1.89237	6.89885	11.824
2021-03-15	3-145	N3	0.1652	0.0447				2057	1868	3935	0.000165731	1.03377e-08	4.56973	4.4443	0.0309266	1.02822	5.98537	2.14224	9.01403	13.5012
2021-03-15	3-146	N3	0.3321	0.0917				2765	2137	4972	0.00202672	3.35422e-07	8.23268	6.20625	0.165064	1.32651	6.94856	2.99801	14.4389	16.6285
2021-03-15	3-147	N3	0.2207	0.0609				2375	2005	4386	0.000357327	5.61537e-08	5.42982	5.37426	0.0685907	1.01034	6.35149	2.6652	10.8041	14.7692
2021-03-15	3-148	N3	0.2252	0.0614				2260	1914	4273	0.000380469	9.15449e-08	5.01924	4.88368	0.058371	1.02776	5.82727	2.35426	9.90292	13.9252
2021-03-15	3-149	N3	0.259	0.0709				2499	2165	4730	0.00049597	9.17958e-08	6.39868	5.95015	0.0468404	1.07538	6.70374	2.78453	12.3488	15.5396
2021-03-15	3-150	N3	0.1522	0.0403				1890	1828	3834	0.00129218	3.34886e-07	3.58731	4.87466	0.170595	0.73591	6.14087	2.03901	8.46198	13.3571
2021-03-15	3-151	N3	0.1438	0.0399				1773	1604	3537	0.000682505	2.1507e-07	4.24438	3.57748	0.107671	1.18642	5.58442	2.07931	7.82186	12.4386
2021-03-15	3-156	N3	0.2408	0.0659				2465	2086	4780	0.000589522	1.36499e-07	5.69713	5.95908	0.0790876	0.956042	6.55608	2.53089	11.6562	15.337
2021-03-15	3-157	N3	0.1538	0.043				1830	1655	3718	0.000851656	2.19522e-07	4.55917	3.72515	0.118175	1.22389	5.79086	2.08993	8.28432	12.8884
2021-03-15	3-158	N3	0.1477	0.0404				1979	1707	3708	0.000508816	8.30551e-08	3.65242	4.15957	0.102424	0.878075	5.28476	2.32492	7.81199	12.4771
2021-03-15	3-159	N3	0.2001	0.046				2017	1941	3972	0.000758875	1.09197e-07	4.92758	5.6864	0.0959749	0.866556	6.12087	2.56033	10.614	13.904
2021-03-15	3-160	N3	0.1803	0.0467				1903	1723	3682	0.000221571	1.96958e-08	4.78785	4.7258	0.0352152	1.01313	5.32897	2.44746	9.51366	12.6931
2021-03-15	3-163	N3	0.1922	0.0512				1997	1923	3957	0.000232771	2.09287e-08	5.075	5.10697	0.0525292	0.993739	5.98851	2.38643	10.182	13.6889
2021-03-15	3-164	N3	0.148	0.0391				1874	1634	3526	0.00111829	3.37087e-07	4.46587	3.47699	0.170496	1.28441	5.41889	2.15695	7.94286	12.2975
2021-03-15	3-165	N3	0.2236	0.0604				2322	2049	4455	0.00116253	5.2894e-07	6.32278	5.19488	0.095962	1.21712	6.50786	2.55984	11.5177	14.9324
2021-03-15	3-168	N3	0.2061	0.0542				1742	1647	3544	0.00100625	1.40084e-07	3.60481	4.61105	0.137526	0.781776	5.18599	2.22166	8.21586	12.1819
2021-03-15	3-170	N3	0.1288	0.035				1868	1558	3441	0.000411816	3.98583e-08	3.51572	3.27713	0.0837694	1.0728	5.12616	1.97916	6.79284	11.6343
2021-03-15	3-171	N3	0.2659	0.0726				2543	2325	4893	0.00115699	2.34855e-07	6.11954	7.09425	0.117458	0.862607	6.98172	2.62684	13.2138	16.0302
2021-03-15	3-173	N3	0.1784	0.0466				2040	1793	3984	0.000169573	1.93735e-08	4.70126	4.66919	0.0345911	1.00687	5.96134	2.33542	9.37044	13.557
2021-03-15	3-174	N3	0.2627	0.0675				2368	2135	4629	0.000811357	2.26075e-07	6.98432	6.20053	0.0815955	1.12641	7.00006	2.73664	13.1848	15.8528
2021-03-15	3-175	N3	0.2318	0.0594				2276	2116	4398	0.000401061	9.69703e-08	6.19048	5.84818	0.0394694	1.05853	6.65583	2.65279	12.0387	15.06
2021-03-15	3-176	N3	0.2448	0.0749				2201	1930	4170	0.000732897	2.69679e-07	5.74141	5.13743	0.0868716	1.11757	6.12296	2.50835	10.8788	14.2439
2021-03-15	3-177	N3	0.2145	0.0779				2179	1809	4001	0.000665073	1.68076e-07	5.23175	4.59423	0.095909	1.13877	5.78487	2.46519	9.82597	13.5959
2021-03-15	3-179	N3	0.2264	0.0675				2098	1841	4161	0.00141204	7.43718e-08	4.40747	5.81949	0.208293	0.757363	6.02	2.54405	10.227	14.0379
2021-03-15	3-181	N3	0.1782	0.0495				1871	1700	3581	0.000271334	9.27602e-08	4.5866	4.40701	0.0503361	1.04075	5.4477	2.3733	8.99361	12.5695
2021-03-15	3-183	N3	0.2752	0.0705				2508	2332	4844	0.000420948	4.70368e-08	7.41407	7.03531	0.039159	1.05384	7.081	2.84211	14.4494	16.2426
2021-03-15	3-185	N3	0.1862	0.0483				1803	1782	3613	0.000456166	2.93197e-08	3.86156	4.3174	0.0867402	0.894417	5.15687	2.19327	8.17896	12.1286
2021-03-15	3-187	N3	0.2443	0.0739				2524	2199	4904	0.000401155	1.10502e-07	6.75898	6.90028	0.0602733	0.979522	7.47212	2.86313	13.6593	16.7217
2021-03-15	3-188	N3	0.2844	0.0686				2106	1996	4206	0.000425492	1.00886e-07	5.27723	5.42235	0.0663856	0.973236	6.53108	2.43456	10.6996	14.5527
2021-03-15	3-193	N3	0.2448	0.0658				2377	2061	4469	0.00104164	3.63135e-07	6.47631	5.43473	0.129379	1.19165	6.07118	2.74385	11.911	14.7865
2021-03-15	3-194	N3	0.3797	0.1013				2554	2309	4970	0.000849608	2.15254e-07	8.28938	9.13882	0.0788856	0.907051	8.09576	3.23748	17.4282	18.7731
2021-03-15	3-195	N3	0.2254	0.061				2330	1999	4419	0.000863274	7.39004e-08	6.06607	5.20965	0.10304	1.16439	6.22197	2.64698	11.2757	14.6212
2021-03-15	3-197	N3	0.2324	0.0664				2330	1999	4419	0.000863274	7.39004e-08	6.06607	5.20965	0.10304	1.16439	6.22197	2.64698	11.2757	14.6212
2021-03-15	3-198	N3	0.2949	0.0765				2697	2252	4993	0.000813225	3.38629e-07	7.29364	7.04214	0.109137	1.03571	7.6106	2.86625	14.3358	17.3504
2021-03-15	3-201	N3	0.2117	0.0598				2182	1925	4216	0.000214829	1.92304e-08	5.10288	5.29844	0.0366665	0.963091	5.98213	2.66771	10.4013	14.0889
2021-03-15	3-202	N3	0.2122	0.0594				2427	2190	4663	0.000942088	1.10513e-07	4.28816	5.23025	0.157205	0.819877	6.36456	2.44816	9.5184	14.8834
2021-03-15	3-203	N3	0.414	0.1104				2598	2265	4966	0.000669941	1.50904e-07	8.48805	9.15259	0.0684189	0.927393	7.91537	3.1367	17.6406	18.7976
2021-03-15	3-204	N3	0.4049	0.1009				2598	2315	4980	0.00045302	1.01874e-07	9.5641	9.72433	0.0406065	0.983523	8.38033	3.37812	19.2884	19.6119
2021-03-15	3-206	N3	0.4463	0.1181				2552	2399	4980	0.000847085	1.8701e-07	9.86166	10.708	0.071546	0.920962	8.56456	3.55763	20.5697	20.2346
2021-03-15	3-207	N3	0.2565	0.0687				2547	2266	4862	0.000651964	8.66194e-08	6.1861	6.7895	0.0684154	0.911128	6.77011	2.74066	12.9756	15.9307
2021-03-15	3-208	N3	0.3117	0.0856				2554	2214	4977	0.000386347	1.09638e-07	6.99932	7.22603	0.0732683	0.968627	7.05492	3.19813	14.2253	16.6505
2021-03-15	3-209	N3	0.3904	0.0999				2680	2244	4966	0.0006077	1.3578e-07	8.52085	8.99711	0.0509268	0.947066	7.86827	3.12104	17.518	18.7895
2021-03-15	3-210	N3	0.2833	0.0785				2683	2124	4963	0.000819831	1.31629e-07	6.18524	6.99365	0.084226	0.884409	7.41223	2.77024	13.1789	16.9207
2021-03-15	3-211	N3	0.2303	0.061				2094	2079	4245	0.000212212	4.70528e-08	5.37817	5.41874	0.0453216	0.992513	6.17471	2.49699	10.7969	14.337
2021-03-15	3-212	N3	0.3681	0.0948				2580	2261	4963	0.000561194	1.71434e-07	8.79322	8.87962	0.0515198	0.990269	8.36243	3.01805	17.6728	19.1667
2021-03-15	3-213	N3	0.288	0.0735				2593	2359	4986	0.000723709	1.6864e-07	7.44198	6.73623	0.0593449	1.10477	7.70388	2.87629	14.1782	17.5536
2021-03-15	3-216	N3	0.2777	0.0708				2591	2352	4975	0.000463777	9.74737e-08	7.30099	6.94525	0.0508526	1.05122	7.5183	2.80859	14.2462	17.0591
2021-03-15	3-219	N3	0.1834	0.0504				2011	1851	3897	0.00085241	5.05775e-08	4.01439	4.86666	0.119093	0.824876	5.53011	2.29048	8.88106	12.9919
2021-03-15	3-220	N3	0.1664	0.0436				2115	1858	4165	0.000367556	4.39461e-08	4.57423	4.30572	0.0606895	1.06236	6.23425	2.28476	8.87995	13.9155
2021-03-15	3-221	N3	0.3502	0.0944				2635	2317	4977	0.000872924	1.63643e-07	8.48578	9.35835	0.0805375	0.90676	8.34898	3.19813	17.8441	19.6079
2021-03-15	3-222	N3	0.1926	0.0529				2563	2253	4994	0.00115839	1.94871e-07	4.55402	5.71241	0.163841	0.797215	6.93721	2.44484	10.2664	15.8918
2021-03-15	3-223	N3	0.2651	0.072				2597	2257	4943	0.000625955	1.01185e-07	7.13595	6.64649	0.068439	1.07364	7.48576	2.86201	13.7824	17.2021
2021-03-15	3-224	N3	0.3531	0.0906				2664	2276	4984	0.00104746	9.39234e-08	7.92479	8.97178	0.0888341	0.883302	8.04898	3.0585	16.8966	18.5793
2021-03-15	3-225	N3	0.2636	0.0706				2419	2204	4626	0.000318814	8.63348e-08	5.93193	6.24669	0.0455794	0.949611	6.54841	2.80783	12.1786	15.3789
2021-03-15	3-226	N3	0.2208	0.0599				2680	2118	4819	0.000275533	2.31657e-08	5.32317	5.18777	0.053772	1.0261	6.87174	2.42964	10.5109	15.4692
2021-03-15	3-227	N3	0.3065	0.0783				2683	1995	4977	0.00162199	4.59523e-07	8.17068	6.57618	0.125228	1.24247	7.605	2.8534	14.7469	17.9064
2021-03-15	3-228	N3	0.227	0.062				2393	1914	4379	0.00135458	3.854e-07	5.97397	4.68125	0.155768	1.27615	6.18001	2.62131	10.6552	14.622
2021-03-15	3-229	N3	0.2281	0.0596				2650	1976	4813	0.00210072	8.10212e-07	6.78366	4.68311	0.198195	1.44854	6.70662	2.59229	11.4668	15.6772
2021-03-15	3-230	N3	0.3626	0.0957				2613	2369	5001	0.000679525	1.53438e-07	9.07014	9.13155	0.0509871	0.993275	8.20973	3.31446	18.2017	19.5107
2021-03-15	3-231	N3	0.3196	0.0795				2541	2270	4972	0.000462936	7.82037e-08	7.62233	7.18791	0.0429601	1.06044	7.51581	2.75334	14.8102	17.8967
2021-03-15	3-232	N3	0.1775	0.0487				2212	1951	4202	0.00137591	2.96064e-07	3.54342	4.91328	0.200361	0.721192	5.91947	2.20076	8.4567	13.5998
2021-03-15	3-233	N3	0.224	0.0604				2641	2118	4899	0.00104057	2.86322e-07	4.69611	5.65076	0.135072	0.831059	6.71896	2.39831	10.3469	15.4071
2021-03-15	3-234	N3	0.2191	0.0595				2172	1933	4306	0.000327675	3.39026e-08	5.21225	4.90658	0.0454093	1.0623	6.20723	2.62425	10.1188	14.2943
2021-03-15	3-235	N3	0.2912	0.0784				2541	2265	4909	0.000624659	8.48671e-08	6.78872	6.36732	0.0810022	1.06618	6.59904	2.82946	13.156	15.8177
2021-03-15	3-236	N3	0.337	0.0908				2580	2052	4976	0.000922996	9.60773e-08	8.00526	7.08302	0.087493	1.1302	7.5431	3.09034	15.0883	17.5202
2021-03-15	3-237	N3	0.3092	0.0845				2599	2232	4957	0.00164785	1.21997e-06	8.60151	7.02238	0.143122	1.22487	7.59202	3.03901	15.6239	18.1534
2021-03-15	3-238	N3	0.3425	0.0928				2729	1986	4962	0.00210522	1.62587e-06	8.83807	6.76607	0.163747	1.30623	7.18351	3.17543	15.6041	17.3798
2021-03-15	3-239	N3	0.2647	0.0714				2365	2198	4599	0.00181818	3.48331e-07	5.0287	6.84687	0.208964	0.734452	6.87139	2.73958	11.8756	15.4645
2021-03-15	3-240	N3	0.3207	0.0856				2575	2210	4972	0.00261414	9.76366e-07	5.91998	8.53341	0.225959	0.693742	7.25407	3.04916	14.4534	17.2743
2021-03-15	3-241	N3	0.3188	0.0842				2564	2370	4988	0.00147301	3.07144e-07	8.14393	6.6732	0.104669	1.22039	7.5395	2.76089	14.8171	17.3609
2021-03-15	3-242	N3	0.3101	0.0827				2650	2259	4979	0.00130269	3.51317e-07	8.15549	6.87196	0.093397	1.18678	7.94936	2.80913	15.0275	18.021
2021-03-15	3-243	N3	0.3509	0.0908				2740	2196	4956	0.00183988	1.77089e-06	9.08824	7.25425	0.125976	1.25282	7.66738	3.01625	16.3425	18.4236
2021-03-15	3-245	N3	0.3855	0.0975				2618	2366	4985	0.000935348	5.48944e-07	8.96279	8.41578	0.080066	1.065	7.45026	3.11566	17.3786	17.7384
2021-03-15	3-246	N3	0.3965	0.1067				2644	2324	4975	0.001465	1.5152e-06	9.01259	10.3406	0.0971359	0.871571	8.58203	3.4219	19.3532	20.0523
2021-03-15	3-247	N3	0.352	0.094				2661	2219	4980	0.00155828	2.8095e-07	7.80258	9.36072	0.124332	0.833545	7.75504	3.38957	17.1633	18.4368
2021-03-15	3-248	N3	0.3538	0.0919				2583	2309	4981	0.00108029	5.04981e-07	8.44384	7.46913	0.094436	1.1305	7.46213	3.0408	15.913	17.4777
2021-03-15	3-249	N3	0.4656	0.1232				2667	2275	4977	0.000666567	1.56337e-07	10.8298	10.863	0.0703629	0.996941	8.9793	3.56898	21.6928	21.0477
2021-03-15	3-250	N3	0.4891	0.1231				2508	2369	4984	0.00360368	7.48963e-07	9.08929	12.693	0.204745	0.716089	9.09016	3.45522	21.7823	21.132
2021-03-15	3-251	N3	0.2934	0.0782				2505	2401	4966	0.00171373	5.1125e-07	6.05073	7.76092	0.143126	0.77964	7.61505	2.67225	13.8117	17.2764
2021-03-15	3-252	N3	0.2424	0.0666				2505	2304	4973	0.000724982	1.30616e-07	5.54826	6.27128	0.0878375	0.884709	7.10264	2.59162	11.8195	16.0919
2021-03-15	3-253	N3	0.2022	0.0558				2425	2091	4575	0.000409534	2.40964e-08	4.95721	5.36661	0.0562658	0.923714	6.46126	2.43127	10.3238	14.7826
2021-03-15	3-254	N3	0.3082	0.0801				2575	2327	4974	0.0027144	1.36277e-06	6.28969	9.00409	0.205844	0.698537	8.07938	2.9527	15.2938	17.9418
2021-03-15	3-255	N3	0.2799	0.0746				2608	2285	4968	0.000449084	1.03402e-07	7.54867	7.24513	0.0457667	1.0419	8.41606	2.72918	14.7938	18.6692
2021-03-15	3-256	N3	0.2849	0.0728				2613	2347	4976	0.000560286	2.69794e-07	7.29026	7.29945	0.0719951	0.998741	7.5529	2.74033	14.5897	17.0174
2021-03-15	3-257	N3	0.3971	0.1022				2539	2356	4988	0.00112231	6.2502e-07	9.5891	10.5233	0.114663	0.911226	9.37743	3.31744	20.1124	21.3082
2021-03-15	3-258	N3	0.1929	0.0512				2191	2007	4232	0.0011368	1.94808e-07	5.54025	4.40349	0.132521	1.25815	6.63557	2.3207	9.94374	14.5893
2021-03-15	3-259	N3	0.3018	0.0789				2693	2277	4975	0.00251291	1.04407e-06	8.81875	6.30598	0.180109	1.39847	7.86194	2.86147	15.1247	17.648
2021-03-15	3-260	N3	0.3698	0.0924				2629	2346	4994	0.0006254	2.88339e-07	9.56443	9.53729	0.0713647	1.00284	9.31505	3.0751	19.1017	20.9346
2021-03-15	3-261	N3	0.2998	0.0789				2580	2310	4943	0.000287782	2.20386e-08	7.16348	7.44643	0.0384766	0.962002	7.93537	2.84141	14.6099	17.6497
2021-03-15	3-262	N3	0.3276	0.084				2539	2359	4977	0.000359089	5.20946e-08	8.41843	8.43619	0.0375084	0.997895	8.51882	2.99467	16.8546	19.3036
2021-03-15	3-263	N3	0.3141	0.0813				2504	2320	4905	0.0010638	2.47991e-07	8.02627	6.97794	0.0709888	1.15024	7.85652	2.79952	15.0042	17.5202
2021-03-15	3-264	N3	0.2724	0.0727				2607	2247	4945	0.00214652	5.38098e-07	5.4717	7.61811	0.198243	0.718249	7.06342	2.91346	13.0898	16.3217
2021-03-15	3-265	N3	0.2182	0.0605				2353	2187	4556	0.00182257	3.8934e-07	4.30709	6.12961	0.215981	0.702669	6.83874	2.51214	10.4367	15.3061
2021-03-15	3-266	N3	0.3177	0.0868				2780	2209	4994	0.000612285	1.27358e-07	7.80545	7.30101	0.0476569	1.06909	7.77058	2.93161	15.1065	17.739
2021-03-15	3-267	N3	0.3841	0.1074				2619	2201	4956	0.000435743	8.24118e-08	9.25059	9.67196	0.0473167	0.956433	8.7313	3.13806	18.9225	20.048
2021-03-15	3-268	N3	0.385	0.1026				2687	2158	4968	0.00162711	4.27522e-07	9.90512	8.2919	0.0971967	1.19455	8.54917	3.13232	18.197	19.5833
2021-03-15	3-269	N3	0.4003	0.106				2676	2277	4980	0.00213004	7.60533e-07	8.25117	10.3644	0.139728	0.79611	8.66485	3.0712	18.6155	19.6472
2021-03-15	3-270	N3	0.2444	0.0684				2649	2139	4921	0.000754306	1.4169e-07	6.25578	5.5621	0.0788425	1.12472	6.8678	2.64768	11.8179	15.9347
2021-03-15	3-271	N3	0.3933	0.1041				2670	2250	4954	0.00235569	3.41251e-07	8.09559	10.4512	0.172887	0.774609	8.63342	3.2223	18.5468	19.8091
2021-03-15	3-272	N3	0.3313	0.0892				2714	2240	4983	0.000984879	6.59373e-08	7.23497	8.21946	0.092924	0.880225	7.86419	2.97376	15.4544	18.0504
2021-03-15	3-273	N3	0.4068	0.1055				2593	2281	4968	0.00178041	2.74574e-07	10.3019	8.52146	0.120241	1.20893	8.85156	3.07216	18.8233	20.187
2021-03-15	3-274	N3	0.2559	0.0685				2417	2077	4822	0.000640768	2.5361e-07	6.20064	5.56644	0.0590572	1.11393	6.90231	2.48242	11.7671	15.7327
2021-03-15	3-275	N3	0.2236	0.0611				2639	2296	4961	0.000215521	2.53827e-08	5.26229	5.34057	0.0302766	0.985342	7.2547	2.38632	10.6029	16.2485
2021-03-15	3-276	N3	0.212	0.0629				2284	2052	4534	0.000471274	5.51735e-08	4.93087	4.60016	0.076705	1.07189	6.69897	2.20104	9.53104	14.9005
2021-03-15	3-277	N3	0.37	0.101				2654	2257	4926	0.000530403	1.13938e-07	8.73096	8.21855	0.0516769	1.06235	8.2275	3.0965	16.9495	19.0965
2021-03-15	3-278	N3	0.3306	0.0906				2674	2236	4985	0.000831012	2.09781e-07	7.95201	7.19022	0.0674129	1.10595	8.07101	2.78833	15.1422	18.1944
2021-03-15	3-279	N3	0.2694	0.0717				2755	2203	4964	0.00108934	3.28519e-07	7.14751	6.06531	0.102233	1.17842	7.45123	2.76437	13.2128	17.0306
2021-03-15	3-280	N3	0.2177	0.0614				2490	1929	4448	0.00046024	2.54086e-08	5.35964	4.89947	0.0756334	1.09392	6.25166	2.55096	10.2591	14.6406
2021-03-15	3-281	N3	0.3815	0.1011				2666	2173	4955	0.00035052	5.85232e-08	8.92591	8.85113	0.0357127	1.00845	8.08292	3.12065	17.777	19.2704
2021-03-15	3-282	N3	0.2361	0.0672				2545	2033	4609	0.000201898	3.45578e-08	5.39899	5.54721	0.0419099	0.973281	6.58187	2.36571	10.9462	15.1139
2021-03-15	3-284	N3	0.3815	0.1019				2714	2252	4973	0.00088771	2.07507e-07	9.48246	8.77535	0.0735509	1.08058	8.782	3.14681	18.2578	20.2454
2021-03-15	3-285	N3	0.2596	0.0727				2496	2224	4823	0.000382096	8.78477e-08	5.70617	6.02318	0.072416	0.947369	6.96735	2.33244	11.7294	15.8408
2021-03-15	3-286	N3	0.3103	0.0854				2567	2334	4989	0.00021981	3.60356e-08	7.16025	7.01379	0.0303873	1.02088	7.75638	2.79716	14.174	17.5827
2021-03-15	3-287	N3	0.383	0.1023				2444	2336	4947	0.00116303	9.6931e-07	8.26782	9.40071	0.0947297	0.87949	8.54284	3.07217	17.6685	19.6627
2021-03-15	3-288	N3	0.2447	0.0702				2645	2279	4924	0.000918143	1.99421e-07	6.16995	5.26389	0.0847893	1.17213	6.99722	2.56596	11.4338	15.9389
2021-03-15	3-289	N3	0.4009	0.1084				2584	2277	4988	0.00095238	4.5807e-07	8.93963	9.88219	0.0695274	0.90462	8.4375	3.23768	18.8218	19.9597
2021-03-15	3-291	N3	0.2521	0.0674				2296	1991	4496	0.00040254	1.1684e-07	4.79297	5.18524	0.0573966	0.924348	6.47917	2.26063	9.97821	14.7126
2021-03-15	3-292	N3	0.3083	0.087				2584	2114	4988	0.000820102	6.12009e-08	5.74286	6.56292	0.0916195	0.875046	7.53654	2.58985	12.3058	16.8231
2021-03-15	3-293	N3	0.348	0.0934				2684	2283	4971	0.00159469	1.57938e-07	7.83247	9.42686	0.127048	0.830867	8.28457	3.10485	17.2593	18.9525
2021-03-15	3-294	N3	0.3015	0.0804				2691	2252	4985	0.000467917	4.19328e-08	7.4885	7.08585	0.0619199	1.05682	7.69823	2.94337	14.5743	17.6461
2021-03-15	3-295	N3	0.436	0.1126				2575	2345	4961	0.000545245	1.29313e-07	10.4226	10.6151	0.0370967	0.981863	9.43168	3.20255	21.0376	21.594
2021-03-15	3-296	N3	0.1978	0.0574				2293	1768	4271	0.00124743	2.31122e-07	5.25118	4.0094	0.147397	1.30972	5.91771	2.36297	9.26058	13.9185
2021-03-15	3-297	N3	0.186	0.055				2195	1852	4137	0.000508535	6.33507e-08	4.27182	4.72739	0.058723	0.903632	5.82389	2.21585	8.9992	13.5069
2021-03-15	3-298	N3	0.163	0.0454				1941	1622	3803	0.000539596	9.37444e-08	4.39879	3.87956	0.0676314	1.13384	5.44935	2.24937	8.27835	12.6566
2021-03-15	3-300	N3	0.3858	0.1071				2717	2176	4996	0.000540064	1.04665e-07	9.25947	8.87343	0.0502352	1.0435	8.65907	3.22775	18.1329	20.3027
2021-03-15	3-301	N3	0.2773	0.0808				2552	2167	4985	0.000729845	1.49622e-07	6.20936	6.93634	0.0926096	0.895193	7.00615	2.66026	13.1457	16.3829
2021-03-15	3-302	N3	0.3255	0.0916				2647	2185	4945	0.000386744	6.24648e-08	7.71526	7.97296	0.0491015	0.967679	7.72772	3.04498	15.6882	18.148
2021-03-15	3-303	N3	0.2362	0.0653				2430	1937	4679	0.000910774	1.2077e-07	6.12823	5.22078	0.0937686	1.17382	6.4596	2.59946	11.349	15.1643
2021-03-15	3-304	N3	0.2268	0.0652				2392	1975	4366	0.000771789	6.97649e-08	5.00755	5.77934	0.103099	0.866457	6.24656	2.6173	10.7869	14.6268
2021-03-15	3-305	N3	0.2668	0.0777				2603	2348	4984	0.00110059	3.22265e-07	5.6265	6.72706	0.131902	0.836399	7.50575	2.40287	12.3536	16.8838
2021-03-15	3-306	N3	0.2705	0.0759				2638	2182	4942	0.000469705	8.39824e-08	6.44052	6.4285	0.0622589	1.00187	7.10654	2.73129	12.869	16.3692
2021-03-15	3-307	N3	0.2094	0.0633				2537	2127	4764	0.000432458	4.179e-08	4.87341	4.55183	0.0680962	1.07065	6.56978	2.20452	9.42524	14.9458
2021-03-15	3-308	N3	0.4331	0.119				2608	2295	4970	0.000970587	3.38371e-07	10.3686	9.66947	0.0608032	1.0723	8.87546	3.31091	20.0381	20.71
2021-03-15	3-309	N3	0.253	0.0753				2507	2039	4547	0.000215363	2.91942e-08	4.74663	4.75995	0.0516553	0.997201	6.11512	2.45572	9.50658	14.4125
2021-03-15	3-310	N3	0.2106	0.0637				2408	1987	4471	0.000219882	3.93109e-08	4.7908	4.7064	0.0431836	1.01793	6.11396	2.45517	9.4972	14.4156
2021-03-15	3-311	N3	0.3175	0.0909				2664	2197	4983	0.000540331	7.07529e-08	7.26574	6.77016	0.0552018	1.0732	7.22832	2.78776	14.0359	17.1468
2021-03-15	3-312	N3	0.2138	0.0628				2373	1910	4319	0.00113516	2.14234e-07	5.12129	3.98635	0.140556	1.28471	5.86537	2.29952	9.10765	13.94
2021-03-15	3-315	N3	0.2695	0.0767				2567	2267	4959	0.000331362	1.06938e-07	6.22726	5.96411	0.0478073	1.04412	6.84779	2.77376	12.1914	16.1224
2021-03-15	3-316	N3	0.2365	0.0678				2328	2135	4638	0.000544018	6.04041e-08	5.0024	5.54387	0.0688639	0.902329	6.71583	2.39532	10.5463	15.2257
2021-03-15	3-317	N3	0.4229	0.1129				2564	2343	4924	0.00054476	8.5766e-08	10.3014	10.3159	0.0452057	0.998593	9.2577	3.23925	20.6173	20.9401
2021-03-15	3-318	N3	0.1818	0.0545				2218	1836	4101	0.000812995	1.02241e-07	4.39228	3.58262	0.121173	1.226	6.03146	2.0417	7.9749	13.577
2021-03-15	3-319	N3	0.309	0.085				2635	2255	4960	0.00127523	2.27807e-07	7.90419	6.63896	0.0958812	1.19058	7.0874	2.92205	14.5432	16.8417
2021-03-15	3-320	N3	0.2438	0.0706				2673	2189	4874	0.000481507	6.34706e-08	5.45629	5.93677	0.0644735	0.919066	6.92239	2.68279	11.3931	15.9232
2021-03-15	3-321	N3	0.1692	0.0458				1851	1609	3609	0.000213536	1.6318e-08	4.11843	4.01009	0.0400687	1.02702	5.09602	2.23069	8.12852	12.1723
2021-03-15	3-322	N3	0.2743	0.0716				2403	2139	4610	0.00120684	2.50109e-07	5.4097	6.61576	0.135178	0.817698	6.23863	2.66844	12.0255	15.1359
2021-03-15	3-323	N3	0.2332	0.0593				2242	1792	4231	0.000891214	1.10247e-07	5.41192	4.52073	0.109247	1.19714	5.66784	2.44024	9.93265	13.6695
2021-03-15	3-325	N3	0.2096	0.058				2495	1843	4348	0.00118194	2.51275e-07	5.25372	4.07248	0.141099	1.29006	5.47695	2.51818	9.32619	13.7045
2021-03-15	3-326	N3	0.251	0.0654				2361	2067	4659	0.000267188	6.13765e-08	5.51416	5.57299	0.0406435	0.989443	5.96425	2.7067	11.0872	14.5668
2021-03-15	3-327	N3	0.2498	0.0665				2461	2016	4560	0.00134729	4.68441e-07	6.29796	4.95355	0.133516	1.2714	5.75496	2.78463	11.2515	14.3744
2021-03-15	3-328	N3	0.3015	0.0849				2643	2215	4939	0.000726303	3.51477e-07	7.15378	6.51388	0.0553177	1.09824	7.35827	2.65511	13.6677	17.0624
2021-03-15	3-329	N3	0.2384	0.0678				2423	2137	4636	0.000961	1.09881e-07	4.79766	5.75848	0.109455	0.833147	6.32074	2.37741	10.5561	14.8274
2021-03-15	3-330	N3	0.2523	0.0728				2613	2207	4931	0.00179788	2.21382e-07	4.75291	6.55079	0.224892	0.725548	7.00319	2.51208	11.3037	15.9078
2021-03-15	3-331	N3	0.3302	0.0944				2511	2432	4971	0.00113955	3.8907e-07	6.41868	7.54219	0.147792	0.851037	7.54014	2.71171	13.9609	17.3997
2021-03-15	3-332	N3	0.2776	0.0822				2626	2203	4966	0.000550704	1.02804e-07	6.16995	5.86979	0.0738502	1.05114	7.16273	2.52068	12.0397	16.4383
2021-03-15	3-333	N3	0.3075	0.0901				2650	2323	4978	0.000689115	5.95756e-08	6.37183	7.01269	0.0779087	0.908614	7.38075	2.5271	13.3845	16.8016
2021-03-15	3-334	N3	0.3869	0.1061				2720	2160	4980	0.00112745	4.22819e-07	8.72127	7.65866	0.0840297	1.13875	7.70726	2.98834	16.3799	18.7876
2021-03-15	3-335	N3	0.2974	0.0851				2623	2319	4977	0.00136631	4.85771e-07	7.22971	5.86348	0.12428	1.23301	6.79705	2.87462	13.0932	16.4697
2021-03-15	3-336	N3	0.2641	0.0768				2682	2244	4971	0.000443722	1.34237e-07	5.96711	5.60326	0.0694116	1.06493	6.5343	2.74733	11.5704	15.7804
2021-03-15	3-337	N3	0.3252	0.0904				2507	2261	5002	0.00226447	3.67024e-07	5.82641	8.09076	0.200135	0.720132	7.17672	2.88703	13.9172	17.1896
2021-03-15	3-338	N3	0.2872	0.0863				2602	2184	4933	0.000799233	1.35513e-07	5.75451	6.55375	0.0867451	0.878049	7.26722	2.59916	12.3083	16.519
2021-03-15	3-339	N3	0.2727	0.0757				2604	2193	4983	0.00046973	1.4516e-07	6.36661	6.05604	0.0735779	1.05128	6.97878	2.591	12.4227	16.3777
2021-03-15	3-340	N3	0.2839	0.0827				2578	2308	4909	0.000328347	9.17455e-08	6.08961	6.36657	0.0523034	0.956498	7.26671	2.47361	12.4562	16.2844
2021-03-15	3-341	N3	0.3678	0.1108				2671	2063	4954	0.000929403	3.3751e-07	8.16394	7.30409	0.0782398	1.11772	8.11095	2.92524	15.468	18.4735
2021-03-15	3-342	N3	0.2628	0.0828				2618	2136	4801	0.000511415	1.3078e-07	5.43159	5.74468	0.0889851	0.945499	7.05697	2.3744	11.1763	15.7677
2021-03-15	3-343	N3	0.3557	0.1056				2721	2216	4938	0.000508257	8.40756e-08	7.48008	7.81025	0.0494621	0.957727	7.89845	2.83845	15.2903	17.9824
2021-03-15	3-344	N3	0.2636	0.0755				2427	2057	4586	0.000735187	1.44858e-07	5.88277	5.41452	0.093789	1.08648	6.77956	2.38367	11.2973	15.3529
2021-03-15	3-345	N3	0.2499	0.0705				2558	2283	4855	0.000318483	3.94818e-08	5.55247	5.27198	0.0442188	1.0532	6.82109	2.25478	10.8244	15.4985
2021-03-15	3-346	N3	0.2136	0.0615				2273	2000	4283	0.000557797	7.70064e-08	4.6676	4.38397	0.0770616	1.0647	6.08503	2.02445	9.05157	13.9494
2021-03-15	3-347	N3	0.3137	0.0946				2733	2251	4988	0.0014121	2.83298e-07	7.53874	6.12753	0.108466	1.23031	7.50314	2.50607	13.6663	17.1353
2021-03-15	3-348	N3	0.2749	0.0771				2580	2241	4936	0.000467307	9.47084e-08	6.16282	5.74937	0.0476529	1.07191	7.13205	2.40753	11.9122	16.0815
2021-03-15	3-349	N3	0.2069	0.0579				2182	1868	4173	0.000184397	1.59989e-08	4.39706	4.47236	0.0557516	0.983164	5.90376	2.38017	8.86942	13.6663
2021-03-15	3-350	N3	0.2867	0.0776				2424	2252	4801	0.000248769	2.36639e-08	6.15197	6.33944	0.0418736	0.970428	6.5577	2.72494	12.4914	15.5344
2021-03-15	3-355	N3	0.2151	0.058				2136	1792	4077	0.000600924	1.21995e-07	4.83738	4.26035	0.0784546	1.13544	5.78456	2.31446	9.09772	13.5508
2021-03-15	3-356	N3	0.2099	0.0584				2441	1970	4423	0.00110418	2.39883e-07	4.4583	5.54994	0.124099	0.803305	6.29383	2.32047	10.0082	14.5353
2021-03-15	3-357	N3	0.296	0.0826				2583	2326	4985	0.00085018	3.62268e-07	6.43699	7.28515	0.0884319	0.883577	7.01659	2.80425	13.7221	16.9627
2021-03-15	3-358	N3	0.3013	0.082				2525	2423	4984	0.000612688	7.68057e-08	6.50374	7.11621	0.0853137	0.913933	7.10854	2.81472	13.6199	16.8474
2021-03-15	3-359	N3	0.2373	0.0664				2588	2228	4880	0.000502128	9.56896e-08	5.69914	5.27739	0.0743177	1.07992	6.38782	2.60836	10.9765	15.2719
2021-03-15	3-360	N3	0.3004	0.0814				2586	2244	4975	0.00103677	2.10706e-07	7.34597	6.3869	0.0854487	1.15016	6.93323	2.73663	13.7329	16.4571
2021-03-15	3-362	N3	0.2538	0.0715				2625	2325	4967	0.000531354	1.49435e-07	5.69337	6.13371	0.0627123	0.928211	6.50959	2.50029	11.8271	15.5545
2021-03-15	3-363	N3	0.3004	0.0874				2772	2059	4971	0.00193549	4.12961e-07	7.91778	5.98236	0.155642	1.32352	7.32075	2.75471	13.9001	17.543
2021-03-15	3-367	N3	0.3355	0.0794				2569	2266	4914	0.000335902	4.76994e-08	6.65945	6.58111	0.0401937	1.0119	7.0185	2.61219	13.2406	16.2037
2021-03-15	3-369	N3	0.2082	0.0644				2269	2005	4551	0.000135987	9.36508e-09	4.6293	4.57649	0.022845	1.01154	6.24642	2.2031	9.20579	14.4682
2021-03-15	3-370	N3	0.2362	0.0688				2570	2337	4955	0.000745454	6.64705e-08	4.90189	5.64721	0.0972363	0.86802	6.70976	2.31149	10.5491	15.4947
2021-03-15	3-371	N3	0.2535	0.0712				2585	2287	4979	0.000304679	5.29369e-08	5.74293	6.00816	0.0435861	0.955854	7.14136	2.39537	11.7511	16.1744
2021-03-15	3-372	N3	0.225	0.0639				2391	2134	4804	0.000857391	9.35329e-08	4.94075	5.79811	0.0983229	0.852132	6.55409	2.45332	10.7389	15.2109
2021-03-15	3-373	N3	0.1978	0.0572				2393	1974	4362	0.000295374	5.27138e-08	4.21385	4.49209	0.0959834	0.938062	6.18577	2.23063	8.70594	14.0939
2021-03-15	3-374	N3	0.2039	0.0588				2431	2153	4642	0.000893098	5.0176e-08	4.34027	5.23333	0.13661	0.829351	6.35353	2.32046	9.5736	14.665
2021-03-15	3-375	N3	0.2165	0.0593				2329	2098	4553	0.000338343	6.54334e-08	5.21768	5.47565	0.0427553	0.952889	6.57523	2.29952	10.6933	14.9449
2021-03-15	3-376	N3	0.2538	0.0708				2600	2222	4976	0.000452787	1.01392e-07	5.83625	6.26757	0.0700082	0.931184	7.22258	2.52733	12.1038	16.6398
2021-03-15	3-381	N3	0.3675	0.1016				2693	2289	4988	0.000902076	5.38318e-07	8.75392	8.05611	0.066109	1.08662	8.3477	2.84149	16.81	19.183
2021-03-15	3-382	N3	0.2	0.0568				2384	1895	4413	0.000198888	2.07898e-08	4.47011	4.65474	0.0287945	0.960336	5.90883	2.29696	9.12485	14.0384
2021-03-15	3-383	N3	0.2211	0.0656				2510	2042	4570	0.000661101	1.53277e-07	4.44967	5.11077	0.106074	0.870646	6.29139	2.31469	9.56044	14.552
2021-03-15	3-384	N3	0.1962	0.0584				2369	2028	4448	0.000867994	1.55245e-07	4.63121	3.78601	0.122911	1.22324	6.10815	2.24984	8.41722	14.0813
2021-03-15	3-385	N3	0.2051	0.0575				2337	1980	4343	0.000162407	1.26463e-08	4.5789	4.5829	0.0301062	0.999127	5.82655	2.37739	9.16179	13.8707
2021-03-15	3-386	N3	0.2389	0.061				2549	2172	4871	0.000705486	2.19705e-07	5.80855	5.2166	0.0746819	1.11347	6.21284	2.65576	11.0251	15.1254
2021-03-15	3-387	N3	0.21	0.056				2421	2039	4475	0.000741632	8.91206e-08	4.5506	5.28984	0.0913287	0.860253	6.12572	2.35038	9.84044	14.3229
2021-03-15	3-388	N3	0.1674	0.0465				2164	1838	4076	0.000220763	1.88113e-08	3.85016	4.03865	0.0386654	0.953329	5.62076	2.17036	7.88881	13.111
2021-03-15	3-389	N3	0.2299	0.06				2636	2197	4877	0.000348204	5.93854e-08	5.31138	4.96692	0.0574331	1.06935	6.55909	2.6119	10.2783	15.4479
2021-03-15	3-390	N3	0.2235	0.0575				2420	1931	4618	0.000922333	4.78503e-08	4.62061	5.54219	0.125285	0.833716	5.96498	2.60045	10.1628	14.602
2021-03-15	3-391	N3	0.3222	0.08				2650	2172	4953	0.00114055	2.35825e-07	6.70523	7.84369	0.0838967	0.854857	7.13545	2.92248	14.5489	17.051
2021-03-15	3-392	N3	0.1869	0.0489				2335	1894	4302	0.000268999	2.94085e-08	4.44352	4.219	0.0447202	1.05322	5.92894	2.12306	8.66252	13.793
2021-03-15	3-397	N3	0.1684	0.0461				2053	1917	3975	0.000230313	2.74315e-08	3.9789	4.19273	0.0363771	0.949001	5.72956	1.99172	8.17163	13.0207
2021-03-15	3-398	N3	0.2588	0.0707				2680	2267	4962	0.00118003	2.953e-07	6.44444	5.28361	0.100683	1.2197	6.77014	2.66497	11.728	15.7495
2021-03-15	3-399	N3	0.2323	0.0664				2353	2153	4568	0.00022679	2.35812e-08	4.93678	5.06351	0.0343591	0.974971	6.3486	2.30879	10.0003	14.6458
2021-03-15	3-400	N3	0.2527	0.0695				2553	2157	4794	0.0011434	2.42229e-07	6.1465	5.01624	0.106375	1.22532	6.80268	2.43124	11.1627	15.5436
2021-03-15	3-401	N3	0.2646	0.0733				2589	2154	4931	0.000956263	1.06819e-07	5.30821	6.26428	0.107376	0.847378	6.95556	2.47329	11.5725	15.8909
2021-03-15	3-404	N3	0.2679	0.0685				2679	2211	4975	0.00131952	4.28951e-07	7.08497	5.76665	0.112853	1.22861	7.04808	2.68863	12.8516	16.4644
2021-03-15	3-407	N3	0.2294	0.0615				2362	1993	4400	0.000680301	9.45081e-08	5.88008	5.20571	0.0848183	1.12954	6.01934	2.794	11.0858	14.4759
2021-03-15	3-408	N3	0.2033	0.0619				2342	2140	4487	0.000437083	8.04802e-08	4.98672	5.41538	0.0530146	0.920843	6.48816	2.32649	10.4021	14.6439
2021-03-15	3-409	N3	0.2624	0.0805				2551	2336	4975	0.000656498	6.2639e-07	6.15682	6.77643	0.0994463	0.908563	7.88069	2.44745	12.9332	17.2709
2021-03-15	3-410	N3	0.2414	0.0737				2423	2237	4713	0.000509925	1.71621e-07	5.86877	6.29473	0.0655645	0.932331	7.136	2.56937	12.1635	15.8701
2021-03-15	3-411	N3	0.2251	0.0736				2447	2199	4745	0.00139793	7.21009e-07	6.22451	5.02819	0.138507	1.23792	7.23136	2.41047	11.2527	15.9179
2021-03-15	3-412	N3	0.2069	0.0644				2321	2105	4443	0.000415241	1.27216e-07	5.08973	4.98991	0.0826318	1.02001	6.84877	2.3298	10.0796	15.0334
2021-03-15	3-413	N3	0.3369	0.1019				2485	2349	4973	0.000629355	1.66003e-07	8.56251	9.09321	0.0759088	0.941638	8.23231	3.34802	17.6557	18.9339
2021-03-15	3-414	N3	0.2837	0.0883				2393	2245	4975	0.00046734	1.0316e-07	7.61456	7.3488	0.0517085	1.03616	7.50483	3.11597	14.9634	17.3348
2021-03-15	3-415	N3	0.3204	0.0961				2521	2328	4967	0.000776259	1.89033e-07	7.89098	8.66306	0.0471173	0.910876	7.75186	3.26961	16.554	17.707
2021-03-15	3-416	N3	0.3489	0.1048				2550	2334	4932	0.000887035	1.3667e-07	9.52998	8.73124	0.0822656	1.09148	8.05705	3.43851	18.2612	18.5652
2021-03-15	3-417	N3	0.3646	0.1096				2548	2324	4977	0.00116224	7.02852e-07	9.86245	8.80122	0.102175	1.12058	8.06957	3.54819	18.6637	18.7429
2021-03-15	3-418	N3	0.1575	0.0498				1872	1837	3844	0.00031657	4.81199e-08	4.24393	4.37163	0.0699605	0.970789	6.07499	2.36773	8.61556	13.5723
2021-03-15	3-419	N3	0.2448	0.0698				2622	2187	4935	0.00127071	3.24025e-07	6.43126	7.70191	0.117291	0.835021	7.53393	2.65703	14.1332	17.1074
2021-03-15	3-420	N3	0.146	0.0422				2122	1678	3952	0.000297963	5.33563e-08	4.22653	4.18309	0.0624666	1.01038	5.57796	2.06614	8.40962	12.9431
2021-03-15	3-421	N3	0.2185	0.0613				2638	2253	4934	0.000919071	6.74041e-08	5.75956	6.67855	0.0969899	0.862397	7.01843	2.45232	12.4381	15.933
2021-03-15	3-423	N3	0.215	0.0636				2782	2175	4965	0.000620224	2.86252e-07	6.58669	6.03588	0.0815208	1.09126	7.03652	2.56609	12.6226	16.0852
2021-03-15	3-425	N3	0.19	0.0556				2454	2066	4531	0.00036644	9.03734e-08	5.38576	5.30368	0.0620212	1.01548	6.5903	2.37735	10.6894	14.8781
2021-03-15	3-426	N3	0.1837	0.0539				2233	1997	4425	0.000658339	7.54328e-08	4.6717	5.33004	0.0836771	0.876485	6.3051	2.2731	10.0017	14.3494
2021-03-15	3-428	N3	0.2075	0.0598				2455	2072	4733	0.000481531	1.03329e-07	5.80783	5.42457	0.0574689	1.07065	6.65495	2.44406	11.2324	15.2853
2021-03-15	3-430	N3	0.1693	0.0493				2158	1916	4131	0.000450327	4.90953e-08	4.3638	4.80462	0.0944031	0.908251	6.23503	2.07784	9.16842	13.8445
2021-03-15	3-431	N3	0.1775	0.0525				2119	1923	4092	0.000795618	5.25057e-08	4.23494	5.03056	0.14186	0.841843	6.3572	2.28176	9.26551	13.9928
2021-03-15	3-432	N3	0.2218	0.0646				2644	2272	4994	0.00094311	7.05781e-08	5.60558	6.54869	0.106997	0.855985	7.27868	2.42762	12.1543	16.4782
2021-03-15	3-433	N3	0.1475	0.0441				1981	1756	3829	0.000452284	3.3502e-08	3.77482	4.21772	0.0811904	0.894992	5.8058	1.97616	7.99254	12.963
2021-03-15	3-434	N3	0.1483	0.0441				1950	1766	3737	0.000799283	9.76502e-08	4.34196	3.57822	0.126382	1.21344	5.75584	1.98557	7.92018	12.8174
2021-03-15	3-435	N3	0.3155	0.0831				2544	2415	4981	0.00146951	3.43304e-07	8.18034	9.51079	0.105292	0.860111	8.40352	2.98281	17.6911	18.885
2021-03-15	3-437	N3	0.362	0.0945				2532	2369	4993	0.00207998	1.27712e-06	10.9612	8.8818	0.126806	1.23412	9.07839	3.20977	19.843	20.4702
2021-03-15	3-438	N3	0.2974	0.0825				2501	2256	4981	0.000554463	1.11692e-07	7.59166	8.12068	0.0439762	0.934855	8.16841	2.76378	15.7123	18.0666
2021-03-15	3-439	N3	0.1766	0.0542				2230	2050	4332	0.00112707	1.4845e-07	4.27879	5.40561	0.139854	0.791547	6.32961	2.22767	9.6844	14.2152
2021-03-15	3-440	N3	0.2233	0.069				2629	2291	4935	0.000771988	3.2998e-07	5.4513	6.17733	0.0784433	0.882469	7.20105	2.37595	11.6286	16.0462
2021-03-15	3-441	N3	0.1937	0.0605				2297	1983	4283	0.000467887	1.04268e-07	5.20568	5.08139	0.073063	1.02446	6.40459	2.4834	10.2871	14.4833
2021-03-15	3-442	N3	0.1589	0.0472				2126	1856	4021	0.000201989	2.52999e-08	4.31056	4.30496	0.0489644	1.0013	6.01225	2.29357	8.61552	13.486
2021-03-15	3-443	N3	0.189	0.061				2226	2023	4294	0.000663833	1.73498e-07	4.38516	5.04609	0.0930325	0.86902	6.31539	2.26391	9.43125	14.204
2021-03-15	3-444	N3	0.2956	0.0856				2641	2324	4969	0.000256877	2.42598e-08	7.54408	7.58039	0.0272826	0.99521	7.93441	2.73062	15.1245	17.7127
2021-03-15	3-445	N3	0.2308	0.0686				2342	2213	4582	0.00134864	2.11354e-07	5.31815	6.6615	0.134153	0.798341	7.00104	2.53643	11.9796	15.5868
2021-03-15	3-446	N3	0.221	0.0662				2280	2106	4413	0.00108703	2.92301e-07	5.20588	6.28911	0.130073	0.827761	6.68997	2.47054	11.495	14.9903
2021-03-15	3-450	N3	0.188	0.0517				2298	2112	4519	0.000506219	1.71713e-07	5.48778	5.09779	0.0746671	1.0765	6.64721	2.30558	10.5856	14.9282
2021-03-15	3-451	N3	0.212	0.0586				2504	2312	4857	0.00103195	1.36861e-07	6.42423	5.41046	0.106487	1.18737	7.11359	2.32741	11.8347	15.8491
2021-03-15	3-452	N3	0.1875	0.0501				2239	2126	4491	0.000800546	5.84291e-08	4.8107	5.61086	0.0955369	0.85739	6.68889	2.21259	10.4216	14.8553
2021-03-15	3-454	N3	0.1331	0.039				1894	1608	3507	0.000357563	4.25655e-08	3.48731	3.51801	0.0868795	0.991274	5.09985	2.0927	7.00532	11.8249
2021-03-15	3-456	N3	0.1656	0.0466				2116	1857	3977	0.000758257	1.68572e-07	4.04616	4.80177	0.105641	0.84264	5.61145	2.32496	8.84793	13.2069
2021-03-15	3-457	N3	0.1552	0.0444				2126	1790	3942	0.000371564	4.91616e-08	3.74348	4.08002	0.0897026	0.917514	5.6499	2.08381	7.8235	12.9324
2021-03-15	3-458	N3	0.1917	0.0539				2423	2017	4509	0.000640592	7.94154e-08	5.37719	4.73814	0.0729601	1.13487	6.1433	2.39921	10.1153	14.3971
2021-03-15	3-459	N3	0.2009	0.0567				2356	2050	4573	0.000162133	1.12645e-08	5.21887	5.28089	0.0330805	0.988255	6.26148	2.45389	10.4998	14.6525
2021-03-15	3-460	N3	0.1431	0.0408				1993	1799	3829	0.000830873	6.68729e-08	3.31945	4.14977	0.138783	0.799913	5.09212	2.02919	7.46922	12.2265
2021-03-15	3-461	N3	0.1762	0.0478				2173	1879	4055	0.000163015	1.11622e-08	4.64983	4.72575	0.0275737	0.983935	5.73662	2.30546	9.37558	13.4264
2021-03-15	3-462	N3	0.3138	0.0855				2646	2336	4989	0.000674306	2.35655e-07	8.67618	8.0522	0.0430773	1.07749	8.30643	2.95541	16.7284	18.7513
2021-03-15	3-463	N3	0.2832	0.0745				2615	2348	4969	0.0011164	5.48615e-07	8.29248	7.18648	0.0832333	1.1539	7.95865	2.74965	15.479	17.9651
2021-03-15	3-464	N3	0.1937	0.056				2467	2213	4693	0.00132765	1.77168e-07	4.71624	6.04379	0.169171	0.780345	6.89685	2.41383	10.76	15.4453
2021-03-15	3-465	N3	0.2809	0.076				2603	2245	4984	0.00103355	1.29686e-07	7.29572	8.19666	0.0948302	0.890084	7.87513	2.85073	15.4924	17.7164
2021-03-15	3-467	N3	0.2848	0.0813				2592	2348	4950	0.000708471	1.06467e-07	7.22529	7.93376	0.0915653	0.910702	7.77856	2.92828	15.159	17.5017
2021-03-15	3-469	N3	0.2778	0.0805				2637	2314	4969	0.000655051	2.35074e-07	7.45011	6.8931	0.0627694	1.08081	7.72607	2.79804	14.3432	17.1765
2021-03-15	3-470	N3	0.1901	0.0553				2099	1935	4175	0.000348079	8.46521e-08	4.78853	5.07259	0.0759899	0.944001	6.45244	2.37142	9.86113	14.4305
2021-03-15	3-471	N3	0.2679	0.0773				2575	2352	4982	0.000805121	2.04021e-07	7.27252	6.56096	0.0702295	1.10845	7.56343	2.74576	13.8335	16.8554
2021-03-15	3-472	N3	0.3008	0.0836				2549	2321	4976	0.000798857	2.03533e-07	7.26618	6.56023	0.0694818	1.10761	7.56146	2.74621	13.8264	16.84
2021-03-15	3-473	N3	0.2088	0.0582				2401	2109	4572	0.000440569	5.2817e-08	5.80885	5.48898	0.0595852	1.05827	6.72198	2.4253	11.2978	15.0932
2021-03-15	3-474	N3	0.1939	0.0541				2252	1949	4370	0.000852972	6.36279e-08	4.85631	5.70906	0.102966	0.850632	6.44944	2.38931	10.5654	14.5029
2021-03-15	3-475	N3	0.1968	0.0555				2400	1996	4406	0.000558495	1.44026e-07	5.56359	5.03014	0.0767713	1.10605	6.59534	2.39741	10.5937	14.7981
2021-03-15	3-476	N3	0.2328	0.065				2570	2191	4861	0.00147796	2.80197e-07	5.46409	6.94173	0.15605	0.787136	7.28184	2.596	12.4058	16.3043
2021-03-15	3-478	N3	0.389	0.1106				2576	2274	4987	0.000960771	2.68504e-07	9.45482	8.79164	0.0786803	1.07543	8.69292	3.14117	18.2465	19.7779
2021-03-15	3-479	N3	0.217	0.0642				2524	2109	4845	0.001032	1.28568e-07	6.33686	5.30754	0.109299	1.19393	6.86814	2.53504	11.6444	15.71
2021-03-15	3-480	N3	0.2104	0.0598				2518	2232	4762	0.000230583	3.27025e-08	5.79697	5.61871	0.0328576	1.03173	6.94304	2.42324	11.4157	15.628
2021-03-15	3-481	N3	0.1998	0.0594				2355	2090	4561	0.000562292	2.27193e-07	5.01207	5.57199	0.0823951	0.899511	6.43735	2.48027	10.5841	14.7572
2021-03-15	3-482	N3	0.1847	0.0549				2362	2159	4568	0.00171337	2.35033e-07	4.14503	5.8584	0.212619	0.707536	6.42841	2.19175	10.0034	14.6045
2021-03-15	3-483	N3	0.3083	0.0843				2764	2128	4968	0.000523893	2.18703e-07	7.07019	7.43585	0.0536318	0.950825	7.71744	2.95594	14.506	18.1218
2021-03-15	3-484	N3	0.367	0.0991				2784	2184	4998	0.000980798	3.36432e-07	9.33386	8.42271	0.0709404	1.10818	8.37746	3.11767	17.7566	19.794
2021-03-15	3-485	N3	0.248	0.0704				2746	2099	4952	0.000881166	1.33874e-07	5.53003	6.41119	0.119044	0.862558	6.90423	2.62676	11.9412	16.419
2021-03-15	3-486	N3	0.3511	0.0953				2635	2172	4954	0.00132306	4.28717e-07	7.73519	9.04325	0.107386	0.855355	8.16819	2.97428	16.7784	19.1735
2021-03-15	3-487	N3	0.2773	0.0703				2614	2255	4968	0.00139426	2.24496e-07	5.98407	7.37824	0.131499	0.811043	7.24872	2.62426	13.3623	17.0198
2021-04-11	4-001	N4	0.7316	0.2523	0.0481	0.016	1.6	2627	2349	4983	0.00125384	4.12502e-07	13.6397	12.4688	0.0595616	1.09391	9.98391	3.96167	26.1086	23.0256
2021-04-11	4-002	N4	0.4198	0.1387	0.0245	0.0048	1.1	2573	2333	4980	0.00049509	1.0107e-07	8.26489	8.17346	0.0711659	1.01119	7.40919	3.44717	16.4384	17.9239
2021-04-11	4-005	N4	0.5136	0.1711	0.0257	0.0121	1.1	2564	2367	4992	0.00120356	2.12047e-07	9.75607	10.9542	0.0951914	0.890628	8.91679	3.62566	20.7102	20.4382
2021-04-11	4-006	N4	1.0523	0.3475	0.0466	0.0143	1.3	2575	2348	4981	0.002579	7.76446e-07	21.7333	19.1543	0.0803456	1.13464	11.5811	5.39833	40.8877	27.4051
2021-04-11	4-007	N4	0.627	0.2159	0.027	0.0085	1	2625	2340	4977	0.000449571	1.42811e-07	12.294	12.6863	0.0549656	0.969079	9.7321	4.07567	24.9803	22.332
2021-04-11	4-008	N4	0.5289	0.1767	0.0281	0.0092	1.2	2534	2328	4987	0.000967836	3.68737e-07	10.2689	11.2185	0.0612991	0.915353	9.38636	3.7336	21.4875	21.1051
2021-04-11	4-009	N4	0.7605	0.2419	0.0295	0.0093	0.9	2496	2341	4982	0.00163135	4.76424e-07	14.9583	13.4249	0.0903781	1.11422	10.5784	4.31489	28.3832	24.2926
2021-04-11	4-010	N4	0.7988	0.2651	0.044	0.0136	1.3	2657	2309	4978	0.00222794	8.58528e-07	13.7427	15.9706	0.141768	0.860501	10.6331	4.4977	29.7133	24.4834
2021-04-11	4-012	N4	0.486	0.167	0.0392	0.0135	1.5	2542	2363	4932	0.000672278	2.87111e-07	9.2104	9.14988	0.0758933	1.00661	9.13526	3.17385	18.3603	20.1329
2021-04-11	4-013	N4	0.4371	0.1514	0.0237	0.0087	1.1	2432	2218	4975	0.000819127	2.83945e-07	8.27997	8.47268	0.0859132	0.977256	8.09509	3.20159	16.7526	18.4062
2021-04-11	4-014	N4	0.5478	0.1616	0.029	0.0074	1	2562	2372	4963	0.000487468	2.00772e-07	10.4102	10.5057	0.0574802	0.990907	8.61472	3.70906	20.9158	19.9608
2021-04-11	4-015	N4	0.6964	0.2556	0.0312	0.0111	1.2	2492	2336	4974	0.00207858	4.25347e-07	10.5531	12.6239	0.114378	0.835965	9.42851	3.64684	23.177	21.5999
2021-04-11	4-016	N4	0.5717	0.2029	0.0254	0.009	1.1	2595	2259	4979	0.00310297	2.17136e-06	11.7989	8.70133	0.15862	1.35599	8.88962	3.45828	20.5003	20.3649
2021-04-11	4-017	N4	0.5719	0.1971	0.0267	0.0094	1	2577	2316	4971	0.00339762	1.54198e-06	8.24047	11.6381	0.202008	0.708061	9.35356	3.30255	19.8785	20.7696
2021-04-11	4-018	N4	0.6239	0.2155	0.0375	0.0123	1.3	2573	2357	4981	0.00249943	1.60825e-06	9.6279	12.1263	0.130276	0.793967	10.0153	3.43427	21.7542	22.1441
2021-04-11	4-019	N4	0.3742	0.1248	0.0201	0.007	0.9	2518	2204	4979	0.000526204	1.49503e-07	6.86275	6.40013	0.0493528	1.07228	8.03305	2.70369	13.2629	17.612
2021-04-11	4-020	N4	0.8857	0.2901	0.0447	0.0136	1.2	2649	2297	4979	0.000622146	3.17572e-07	16.2766	16.6264	0.0492921	0.978961	10.7578	4.61535	32.903	25.0908
2021-04-11	4-021	N4	0.7124	0.2705	0.0348	0.0118	1.3	2652	2264	4981	0.000800497	2.14553e-07	12.6097	13.171	0.0663204	0.957387	9.98858	4.01827	25.7807	22.7739
2021-04-11	4-022	N4	0.6311	0.1992	0.0453	0.0134	1.7	2755	2208	4980	0.000965643	2.38043e-07	13.3903	12.5374	0.064476	1.06803	10.255	4.06009	25.9276	23.2436
2021-04-11	4-023	N4	0.7516	0.238	0.0496	0.0144	1.7	2637	2279	4977	0.00192626	3.33377e-07	14.2823	16.2085	0.105851	0.881159	11.1365	4.26116	30.4908	25.0705
2021-04-11	4-024	N4	0.529	0.1618	0.0384	0.0111	1.6	2645	2331	4985	0.00182796	4.35449e-07	10.3022	12.1247	0.104341	0.849691	9.92885	3.76972	22.4269	22.233
2021-04-11	4-025	N4	0.5306	0.1616	0.0503	0.0148	2.1	2570	2354	4986	0.00127315	3.41622e-07	11.3135	10.0824	0.0763585	1.1221	9.87609	3.57745	21.3959	22.0779
2021-04-11	4-026	N4	0.4482	0.1561	0.0311	0.0095	1.6	2504	2427	4974	0.00334774	1.66827e-06	8.42558	11.765	0.18566	0.716157	9.19593	3.23405	20.1906	20.2838
2021-04-11	4-027	N4	0.5772	0.2026	0.0222	0.0068	1	2428	2355	4972	0.00234157	1.42119e-06	13.2995	10.9933	0.114566	1.20978	10.0471	3.59672	24.2928	22.0408
2021-04-11	4-028	N4	0.5391	0.1812	0.0437	0.014	1.9	2470	2409	4989	0.00361332	2.21763e-06	10.5804	14.1762	0.160259	0.746348	10.1682	3.60795	24.7566	22.2523
2021-04-11	4-029	N4	0.3568	0.1255	0.0224	0.0072	1.3	2422	2283	4985	0.00132686	4.54688e-07	8.89984	7.57352	0.102532	1.17513	8.28719	3.08924	16.4734	18.1345
2021-04-11	4-030	N4	0.6131	0.2114	0.0462	0.0138	1.8	2508	2432	4974	0.000697204	1.57217e-07	12.7494	13.3103	0.0523753	0.957859	10.0451	4.054	26.0598	22.2516
2021-04-11	4-031	N4	0.3336	0.0977	0.0216	0.0069	1.2	2330	2641	4978	0.00123507	4.0819e-07	6.28382	7.30517	0.136998	0.860188	7.91961	2.77267	13.589	17.4995
2021-04-11	4-032	N4	0.5651	0.1752	0.0354	0.0109	1.5	2229	2726	4976	0.00140006	9.01488e-07	10.5174	10.2087	0.106757	1.03024	9.65289	3.38322	20.7261	21.5844
2021-04-11	4-033	N4	0.6736	0.2182	0.0358	0.0113	1.4	2601	2342	4989	0.00100479	2.20736e-07	14.6319	14.1842	0.0593702	1.03157	10.7867	4.25239	28.8161	24.1558
2021-04-11	4-034	N4	0.3707	0.1117	0.0277	0.0088	1.2	2699	2278	4981	0.00121851	7.17854e-07	7.36127	8.40599	0.107605	0.875717	8.26113	3.01528	15.7673	18.5234
2021-04-11	4-035	N4	0.4524	0.1391	0.0191	0.0059	1	2527	2229	4977	0.00137903	3.1921e-07	9.82291	8.80386	0.115435	1.11575	8.85967	3.36637	18.6268	20.0109
2021-04-11	4-036	N4	0.5613	0.1848	0.0355	0.0115	1.5	2667	2289	4984	0.000414789	8.65458e-08	10.3709	10.2171	0.0428807	1.01506	9.3564	3.44623	20.5881	21.0389
2021-04-11	4-037	N4	0.5408	0.1642	0.0302	0.0091	1.3	2314	2583	4988	0.00160914	5.58429e-07	12.8275	11.235	0.0977652	1.14175	9.95564	3.85354	24.0625	22.5668
2021-04-11	4-038	N4	0.5639	0.1819	0.025	0.008	1	2262	2696	4984	0.000549074	1.26621e-07	10.5566	10.8694	0.0591098	0.971226	9.207	3.78458	21.426	21.003
2021-04-11	4-039	N4	0.5481	0.177	0.023	0.0073	1	2196	2675	4981	0.000574373	2.06781e-07	10.8061	10.4293	0.0661937	1.03613	8.72527	3.7489	21.2354	20.3461
2021-04-11	4-040	N4	0.6045	0.1967	0.0288	0.009	1.1	2232	2642	4990	0.000798765	1.68316e-07	11.8961	11.7096	0.0601459	1.01593	8.86547	3.88931	23.6057	20.9504
2021-04-11	4-041	N4	0.4378	0.1437	0.0248	0.0083	1.5	2284	2413	4995	0.000632384	1.98788e-07	10.5159	10.3949	0.0382023	1.01164	8.86252	3.71566	20.9108	20.0385
2021-04-11	4-042	N4	0.7117	0.2246	0.0336	0.0107	1.3	2353	2632	4995	0.000880589	3.68278e-07	14.2192	14.5278	0.0449211	0.97876	10.3958	4.29952	28.7471	23.9196
2021-04-11	4-043	N4	0.5968	0.192	0.0341	0.0104	1.4	2210	2618	4974	0.00094161	3.14304e-07	12.3668	12.2914	0.0762558	1.00614	9.49509	4.08133	24.6582	22.066
2021-04-11	4-044	N4	0.5149	0.1543	0.0353	0.0108	1.3	2356	2592	4983	0.000861947	7.77036e-07	11.0415	10.359	0.0739078	1.06589	9.58879	3.66861	21.4005	21.4088
2021-04-11	4-045	N4	0.7462	0.2222	0.0359	0.0106	1.2	2413	2544	4981	0.00265129	1.24932e-06	17.3796	14.7284	0.112557	1.18	11.0784	4.55115	32.108	25.3155
2021-04-11	4-046	N4	0.8044	0.2491	0.0483	0.0147	1.4	2634	2232	4982	0.003085	1.95164e-06	14.1927	17.2776	0.119549	0.82145	11.2248	4.47615	31.4703	25.5065
2021-04-11	4-047	N4	0.7522	0.2255	0.0426	0.0123	1.4	2327	2638	5006	0.0015144	7.73998e-07	15.5652	16.6754	0.0664877	0.933424	11.1182	4.49175	32.2405	25.4751
2021-04-11	4-048	N4	0.5946	0.196	0.0309	0.0103	1.4	2274	2559	4983	0.00106539	7.40604e-07	12.3516	11.2932	0.0741082	1.09372	9.82355	3.69162	23.6448	22.0881
2021-04-11	4-049	N4	0.4842	0.164	0.0358	0.0121	1.5	2348	2584	4991	0.000631079	1.86137e-07	9.16573	9.19177	0.089894	0.997167	9.28866	3.31487	18.3575	20.3896
2021-04-11	4-050	N4	0.494	0.1564	0.0292	0.0088	1.2	2350	2618	4997	0.00110446	3.98976e-07	10.4149	10.2998	0.101018	1.01117	9.56197	3.50018	20.7147	21.3229
2021-04-11	4-051	N4	0.6522	0.219	0.0358	0.0119	1.3	2309	2605	4977	0.000657615	1.97596e-07	12.3077	11.7016	0.0671754	1.0518	9.62631	3.89557	24.0093	21.8432
2021-04-11	4-052	N4	0.9269	0.3284	0.0563	0.0189	1.6	2273	2663	4988	0.00206212	1.43836e-06	15.8297	17.5249	0.0850935	0.903268	11.3534	4.57187	33.3546	25.6842
2021-04-11	4-053	N4	0.3868	0.1261	0.0136	0.0045	0.7	2237	2577	4976	0.000310664	6.37257e-08	7.36972	7.60088	0.0557592	0.969587	6.97529	3.11174	14.9706	16.5873
2021-04-11	4-054	N4	0.3406	0.1085	0.0232	0.0083	1.1	2290	2641	4972	0.0021928	8.43314e-07	5.91756	8.07523	0.217855	0.732804	8.42761	2.87811	13.9928	18.7024
2021-04-11	4-055	N4	0.598	0.1826	0.0407	0.0135	1.4	2372	2556	4986	0.00261377	4.16215e-07	12.7714	10.1578	0.168016	1.25731	9.39517	3.70485	22.9292	21.2353
2021-04-11	4-056	N4	0.5752	0.1775	0.0368	0.0121	1.5	2280	2615	4968	0.00257285	7.00849e-07	12.5769	10.0043	0.156407	1.25715	9.2168	3.60231	22.5812	20.9287
2021-04-11	4-058	N4	0.6498	0.2166	0.0306	0.0095	1.2	2643	2321	4982	0.00143197	8.51652e-07	12.8919	11.5226	0.0717254	1.11884	9.84704	3.75409	24.4145	22.3943
2021-04-11	4-059	N4	0.7739	0.2543	0.0407	0.0123	1.2	2584	2331	4957	0.00158952	7.42825e-07	12.9798	14.4013	0.0917965	0.901295	10.3085	4.20473	27.381	23.4695
2021-04-11	4-060	N4	0.5014	0.159	0.0241	0.0075	1.2	2628	2346	4978	0.00154597	6.20559e-07	10.3381	11.8099	0.0832447	0.875378	9.4999	3.63004	22.148	21.4918
2021-04-11	4-061	N4	0.6972	0.2129	0.031	0.0069	1.1	2506	2365	4988	0.00583254	4.84197e-06	10.127	15.9469	0.25775	0.63504	10.0723	4.0077	26.0739	23.0006
2021-04-11	4-062	N4	0.3489	0.1097	0.0221	0.0095	1	2588	2205	4926	0.00167545	8.18816e-07	5.73894	7.3357	0.149567	0.78233	7.88642	2.82942	13.0746	17.4525
2021-04-11	4-063	N4	0.3285	0.0963	0.0195	0.0064	0.9	2506	2213	4722	0.000351891	8.43888e-08	6.11326	5.99725	0.0711591	1.01934	7.13867	2.82075	12.1105	16.1554
2021-04-11	4-064	N4	0.7836	0.2524	0.0418	0.0128	1.3	2708	2255	4984	0.00275525	2.03617e-06	16.3908	13.6356	0.113969	1.20206	11.0489	4.28978	30.0264	25.1208
2021-04-11	4-065	N4	0.5864	0.1766	0.025	0.0077	0.9	2628	2323	4967	0.00180617	6.91484e-07	11.7765	9.97057	0.113063	1.18113	9.76971	3.67611	21.7471	22.0287
2021-04-11	4-066	N4	0.4591	0.1547	0.0275	0.0084	1.4	2591	2208	4928	0.000655755	2.35666e-07	9.44673	8.83539	0.0657141	1.06919	9.30316	3.21891	18.2821	20.4126
2021-04-11	4-067	N4	0.4734	0.1598	0.0266	0.0092	1.4	2558	2345	4974	0.0014871	2.60977e-07	10.5616	9.07468	0.0939713	1.16386	8.4836	3.45565	19.6363	19.3561
2021-04-11	4-068	N4	0.5499	0.1849	0.0302	0.0089	1.5	2618	2316	4992	0.00123015	3.25503e-07	10.4645	11.6608	0.0639275	0.897407	9.37788	3.69795	22.1252	21.3624
2021-04-11	4-069	N4	0.6109	0.1967	0.0332	0.0098	1.2	2502	2431	4972	0.000484267	1.6015e-07	11.2527	11.315	0.0571391	0.99449	9.78304	3.74323	22.5677	21.7329
2021-04-11	4-070	N4	0.5976	0.1976	0.0278	0.009	1.2	2533	2402	4980	0.000351095	1.19561e-07	12.2505	12.2602	0.0423571	0.999202	8.81488	4.14535	24.5107	20.7548
2021-04-11	4-072	N4	0.3386	0.1145	0.0228	0.0071	1.2	2405	2139	4743	0.000810574	8.41754e-08	6.36032	7.16695	0.084139	0.887451	7.14117	2.92163	13.5273	16.1937
2021-04-11	4-073	N4	0.4603	0.1567	0.03	0.0093	1.3	2607	2256	4980	0.0018357	6.65783e-07	9.85476	8.10248	0.129885	1.21627	7.9735	3.50619	17.9572	18.3382
2021-04-11	4-074	N4	0.5508	0.178	0.0247	0.0085	1	2626	2299	4986	0.00149062	8.35108e-07	9.63977	10.7041	0.118585	0.900567	9.41392	3.46144	20.3439	20.866
2021-04-11	4-075	N4	0.4226	0.1368	0.0322	0.01	1.3	2662	2262	4966	0.000494873	7.83395e-08	8.57315	8.5883	0.0637445	0.998236	8.17084	3.48819	17.1614	18.5274
2021-04-11	4-076	N4	0.5576	0.1936	0.0329	0.0104	1.4	2645	2279	4964	0.000380971	6.12635e-08	10.3025	10.2663	0.0354896	1.00352	8.49713	3.64593	20.5688	19.5545
2021-04-11	4-077	N4	0.5969	0.206	0.0319	0.0109	1.4	2552	2352	4958	0.00128962	5.84058e-07	11.64	10.3507	0.063853	1.12456	9.7247	3.41538	21.9907	21.8018
2021-04-11	4-078	N4	0.5037	0.1653	0.031	0.0106	1.3	2638	2326	4978	0.0024073	1.00442e-06	10.5404	8.13327	0.186509	1.29597	9.8053	3.18135	18.6737	21.3523
2021-04-11	4-079	N4	0.4158	0.1415	0.0243	0.0089	1.3	2622	2334	4977	0.000533166	8.66908e-08	7.60643	7.96876	0.0506841	0.954531	7.80018	2.9554	15.5752	17.6808
2021-04-11	4-080	N4	0.4841	0.1688	0.0337	0.011	1.5	2680	2234	4995	0.00105167	1.58252e-07	9.69085	8.64123	0.065085	1.12147	7.85969	3.32943	18.3321	18.5937
2021-04-11	4-081	N4	0.6189	0.2139	0.0352	0.0118	1.4	2708	2273	4993	0.002119	4.46174e-07	12.8358	10.7169	0.115784	1.19772	9.1388	3.7789	23.5527	21.429
2021-04-11	4-082	N4	0.6872	0.2372	0.0377	0.0128	1.3	2710	2233	4973	0.000954861	1.8847e-07	12.7668	12.5397	0.0570092	1.01811	9.91371	3.86253	25.3065	22.5996
2021-04-11	4-083	N4	0.4968	0.1624	0.0277	0.0095	1.1	2744	2201	4978	0.000525378	5.40409e-08	9.39067	9.06849	0.0618996	1.03553	9.13192	3.34443	18.4592	20.5529
2021-04-11	4-084	N4	0.2592	0.0858	0.0153	0.0053	1.1	2434	2106	4686	0.000789468	1.82839e-07	6.02986	5.40728	0.096103	1.11514	7.03025	2.4622	11.4371	15.6658
2021-04-11	4-085	N4	0.3865	0.123	0.0311	0.01	1.6	2559	2319	4982	0.000856759	2.79232e-07	9.05526	8.60011	0.089551	1.05292	8.57201	3.18476	17.6554	18.8936
2021-04-11	4-086	N4	0.4063	0.12	0.0152	0.0048	0.7	2613	2291	4974	0.00186741	1.00177e-06	6.93429	8.78334	0.135245	0.789483	7.21838	3.27543	15.7176	17.1744
2021-04-11	4-087	N4	0.6694	0.2267	0.0513	0.0159	1.8	2483	2499	4991	0.0010123	6.54197e-07	13.6556	12.8276	0.0732707	1.06455	10.7368	3.94321	26.4831	23.8254
2021-04-11	4-088	N4	0.399	0.1359	0.0288	0.0098	1.4	2537	2323	4960	0.00107073	4.16965e-07	9.40621	8.33556	0.0896333	1.12844	8.78851	3.0452	17.7418	19.2359
2021-04-11	4-089	N4	0.3973	0.1289	0.023	0.0074	1.2	2512	2323	4967	0.000781047	3.3797e-07	9.43885	8.72407	0.062038	1.08193	9.19501	3.07806	18.1629	20.0292
2021-04-11	4-090	N4	0.5097	0.1747	0.0258	0.0086	1.3	2619	2316	4964	0.000970198	4.00531e-07	9.70436	10.5619	0.0649939	0.918809	9.43761	3.38757	20.2662	21.0435
2021-04-11	4-091	N4	0.3961	0.1325	0.0349	0.0105	1.9	2491	2342	4980	0.000797603	5.03964e-08	8.8271	9.62279	0.0593863	0.917312	8.95548	2.89839	18.4499	19.6615
2021-04-11	4-092	N4	0.3517	0.1093	0.0184	0.0062	1	2581	2340	4969	0.000650653	1.86823e-07	6.8799	7.52996	0.0902778	0.91367	7.57862	2.91045	14.4099	17.2221
2021-04-11	4-093	N4	0.3855	0.1315	0.0217	0.0072	1.2	2582	2336	4929	0.00122252	1.79003e-07	7.57191	8.79326	0.108711	0.861105	8.20136	3.1441	16.3652	18.3714
2021-04-11	4-094	N4	0.3542	0.1211	0.0195	0.0069	1.2	2581	2274	4952	0.000850301	1.06755e-07	7.19117	8.04147	0.0927301	0.89426	7.67725	3.09012	15.2326	17.4995
2021-04-11	4-095	N4	0.6892	0.2186	0.0429	0.0136	1.4	2408	2348	4975	0.000517211	2.3831e-07	14.1417	14.4258	0.0628848	0.980308	9.94382	4.50339	28.5675	22.9158
2021-04-11	4-096	N4	0.3946	0.141	0.0272	0.0097	1.6	2612	2281	4933	0.00101171	2.91127e-07	7.04227	8.04913	0.0835035	0.874911	8.09948	2.98244	15.0914	18.1123
2021-04-11	4-097	N4	0.7507	0.2369	0.039	0.0116	1.4	2588	2335	4985	0.00156212	6.04201e-07	15.6572	14.345	0.0708859	1.09147	10.6649	4.14084	30.0021	24.7051
2021-04-11	4-098	N4	0.6538	0.2	0.033	0.0122	1.1	2489	2342	4976	0.00464126	4.23116e-06	14.1102	9.49587	0.207841	1.48593	9.21002	3.93141	23.606	21.2545
2021-04-11	4-099	N4	0.4894	0.1775	0.0319	0.012	1.5	2506	2380	4888	0.00191316	5.24877e-07	8.14522	10.0503	0.119576	0.810444	8.28889	3.15635	18.1955	18.7736
2021-04-11	4-100	N4	0.559	0.1906	0.0344	0.0113	1.6	2676	2282	4993	0.0016987	7.65931e-07	10.812	12.4746	0.116913	0.866719	9.84536	3.72207	23.2866	22.1939
2021-04-11	4-101	N4	0.6709	0.2158	0.0328	0.0106	1.2	2672	2304	4985	0.0006993	1.5986e-07	13.2764	13.2959	0.0385019	0.998536	9.77587	4.28765	26.5723	22.6768
2021-04-11	4-102	N4	0.4141	0.1369	0.0294	0.01	1.4	2567	2318	4996	0.000599609	9.09637e-08	8.13967	7.93039	0.0738099	1.02639	8.39388	3.12148	16.0701	18.5784
2021-04-11	4-103	N4	0.6616	0.2223	0.0496	0.0162	1.8	2626	2341	5003	0.00216684	1.95359e-06	12.3344	14.333	0.108811	0.860554	10.9739	3.9405	26.6674	24.5748
2021-04-11	4-104	N4	0.5001	0.164	0.0437	0.0144	2	2545	2386	4975	0.000448886	1.39392e-07	10.6066	10.2771	0.0384411	1.03206	9.7911	3.40746	20.8836	21.3003
2021-04-11	4-105	N4	0.4337	0.1537	0.0307	0.0107	1.7	2557	2296	4949	0.00183034	9.27343e-07	9.50408	7.75156	0.107204	1.22609	8.46771	3.06322	17.2556	18.8915
2021-04-11	4-106	N4	0.4799	0.1588	0.0332	0.0117	1.5	2659	2280	4948	0.000853375	2.23565e-07	10.1479	9.31901	0.0579946	1.08895	9.21569	3.33231	19.467	20.4938
2021-04-11	4-107	N4	0.5512	0.1877	0.0349	0.0105	1.6	2469	2450	4961	0.000598245	7.53588e-08	11.2753	10.7442	0.0458638	1.04943	9.78839	3.61827	22.0195	21.6806
2021-04-11	4-108	N4	0.5543	0.1886	0.0333	0.011	1.4	2561	2394	4958	0.00364303	1.43692e-06	14.2184	10.5754	0.199853	1.34448	9.51568	4.01531	24.7938	21.4299
2021-04-11	4-109	N4	0.4809	0.1559	0.0311	0.0104	1.4	2590	2365	4970	0.00173518	1.10877e-06	9.40461	11.0834	0.104726	0.848533	9.66234	3.33262	20.488	21.2052
2021-04-11	4-110	N4	0.7776	0.2662	0.0431	0.0136	1.4	2620	2346	4968	0.000690764	1.51652e-07	14.5295	14.0389	0.0443075	1.03494	10.2806	4.15072	28.5684	23.5618
2021-04-11	4-111	N4	0.5365	0.192	0.0293	0.0105	1.4	2576	2356	4945	0.00159271	1.12885e-06	9.31409	10.8819	0.122392	0.855929	9.42238	3.41321	20.1959	21.0682
2021-04-11	4-112	N4	0.583	0.2093	0.0251	0.0094	1.1	2521	2305	4997	0.00120209	2.46805e-07	10.6672	11.8525	0.0650942	0.899994	8.65584	3.92219	22.5197	20.1932
2021-04-11	4-113	N4	0.4562	0.1593	0.019	0.0071	0.9	2539	2372	4977	0.00301993	1.12163e-06	8.1351	11.1546	0.188721	0.729307	9.01528	3.4342	19.2897	20.2482
2021-04-11	4-114	N4	0.5703	0.2152	0.0286	0.0104	1.5	2357	2313	4803	0.000284084	3.93464e-08	10.5049	10.3617	0.0268087	1.01382	9.25218	3.61415	20.8665	21.5618
2021-04-11	4-115	N4	0.3812	0.1434	0.0251	0.0096	1.4	2444	2226	4975	0.00149811	5.32992e-07	8.29027	6.86047	0.112898	1.20841	7.71271	2.98817	15.1507	17.3245
2021-04-11	4-116	N4	0.6013	0.2112	0.0378	0.0129	1.7	2591	2344	4960	0.00049373	8.7704e-08	11.8344	12.2637	0.042113	0.964998	10.0041	3.71754	24.0981	22.4334
2021-04-11	4-117	N4	0.5657	0.2031	0.0314	0.0115	1.4	2571	2337	4943	0.00176162	6.56895e-07	9.79946	11.3996	0.106109	0.859635	8.83331	3.45261	21.199	20.3422
2021-04-11	4-118	N4	0.4843	0.1759	0.0241	0.0091	1.2	2595	2180	4957	0.000798101	1.89129e-07	9.39619	8.71132	0.0657327	1.07862	8.34753	3.47023	18.1075	18.9364
2021-04-11	4-119	N4	0.5032	0.1734	0.0332	0.0111	1.4	2624	2333	4990	0.00344217	3.17004e-06	8.30992	11.7191	0.191171	0.709089	9.49139	3.26961	20.0291	21.0053
2021-04-11	4-120	N4	0.4807	0.1659	0.031	0.0112	1.4	2570	2329	4918	0.0006775	1.46339e-07	8.581	8.63372	0.0669114	0.993894	9.37195	2.88348	17.2147	20.31
2021-04-11	4-121	N4	0.7724	0.2785	0.048	0.0162	1.7	2553	2419	4983	0.00173365	6.37451e-07	14.6113	16.1339	0.0828914	0.905625	11.0731	4.27104	30.7452	24.9164
2021-04-11	4-122	N4	0.4185	0.1444	0.0325	0.0115	1.6	2694	2295	4993	0.000899856	2.10368e-07	8.48301	7.86256	0.0741435	1.07891	8.66803	3.0152	16.3456	19.1438
2021-04-11	4-123	N4	0.4948	0.1719	0.0232	0.0081	1	2644	2308	4986	0.00243896	1.09087e-06	9.21335	11.6419	0.143072	0.791397	8.81018	3.53847	20.8552	20.4852
2021-04-11	4-124	N4	0.3532	0.116	0.0238	0.0079	1.3	2677	2310	4999	0.000689708	2.2257e-07	7.06811	7.72243	0.101183	0.91527	8.47619	2.85638	14.7905	18.6237
2021-04-11	4-125	N4	0.6785	0.2254	0.0379	0.013	1.6	2543	2291	4971	0.00202451	7.27587e-07	12.556	14.5803	0.0932417	0.861162	10.4376	4.05677	27.1363	23.4084
2021-04-11	4-126	N4	0.616	0.2102	0.0381	0.0131	1.6	2577	2294	4987	0.00144204	3.17871e-07	12.9967	11.7778	0.0866772	1.10349	10.4767	3.73374	24.7744	23.1888
2021-04-11	4-127	N4	0.5722	0.2126	0.0325	0.0121	1.6	2533	2285	4962	0.0017227	1.38019e-06	9.84989	11.3513	0.133998	0.86773	9.1125	3.64142	21.2012	20.5197
2021-04-11	4-128	N4	0.5042	0.1787	0.0247	0.0093	1.1	2585	2312	4946	0.000901911	4.01176e-07	10.41	9.52507	0.0623475	1.09291	8.73732	3.58117	19.9351	19.898
2021-04-11	4-129	N4	0.5072	0.192	0.0246	0.0101	1.2	2668	2271	4978	0.000317531	6.55816e-08	9.37609	9.53482	0.0342513	0.983353	8.45655	3.37782	18.9109	19.2702
2021-04-11	4-130	N4	0.3218	0.1105	0.0129	0.0046	0.7	2610	2366	4988	0.00219701	7.78643e-07	5.69034	7.85924	0.190921	0.724032	6.93476	2.85654	13.5496	16.4301
2021-04-11	4-131	N4	0.4879	0.1544	0.0413	0.0143	1.9	2448	2355	4940	0.00155657	5.40315e-07	9.84138	8.28482	0.095278	1.18788	9.00064	3.17392	18.1262	19.6566
2021-04-11	4-132	N4	0.4421	0.1619	0.0152	0.0057	0.8	2557	2364	4960	0.000613971	2.48603e-07	8.17444	8.65119	0.0812602	0.944892	7.74071	3.22396	16.8256	17.9727
2021-04-11	4-133	N4	0.5065	0.1652	0.0236	0.0082	1	2487	2219	4745	0.000395536	1.04221e-07	9.83119	9.60257	0.0435373	1.02381	8.91249	3.41123	19.4338	20.0631
2021-04-11	4-135	N4	0.507	0.1563	0.0316	0.01	1.3	2554	2246	4958	0.00167126	6.56108e-07	10.5249	9.04326	0.119022	1.16384	9.24673	3.32389	19.5681	20.7367
2021-04-11	4-136	N4	0.3992	0.1283	0.0221	0.0071	1.2	2637	2302	4983	0.00141535	9.58114e-08	7.24382	8.65899	0.142192	0.836567	8.33263	3.05529	15.9028	18.5723
2021-04-11	4-137	N4	0.3408	0.1079	0.0225	0.0076	1.2	2486	2240	4978	0.00206768	7.7702e-07	5.57676	7.64444	0.195394	0.729518	7.97061	2.65576	13.2212	17.7878
2021-04-11	4-138	N4	0.5835	0.1861	0.0325	0.0107	1.3	2629	2348	4988	0.000869094	1.7509e-07	10.557	11.2546	0.0555691	0.938016	9.56631	3.53316	21.8116	21.4035
2021-04-11	4-139	N4	0.6495	0.2174	0.0321	0.0101	1.2	2540	2345	4983	0.00408279	2.01925e-06	10.7584	14.8409	0.217568	0.724918	10.0631	3.79054	25.5993	22.9013
2021-04-11	4-140	N4	0.4131	0.1296	0.0303	0.0098	1.6	2531	2421	4982	0.000733439	1.71128e-07	8.59808	8.22324	0.0717067	1.04558	8.87328	3.20001	16.8213	19.47
2021-04-11	4-141	N4	0.5716	0.1816	0.0409	0.0129	1.7	2475	2381	4966	0.000764199	2.66794e-07	11.7976	11.4348	0.0651072	1.03172	9.60098	3.64176	23.2324	21.3824
2021-04-11	4-142	N4	0.5811	0.1848	0.0387	0.0127	1.7	2539	2408	4983	0.00136549	3.64571e-07	12.6884	11.6157	0.0818805	1.09235	9.95345	3.77315	24.3041	22.206
2021-04-11	4-143	N4	0.4224	0.1259	0.0286	0.0099	1.5	2548	2425	4975	0.0014877	1.6905e-07	8.47408	9.96177	0.127014	0.850659	8.8086	3.35043	18.4359	19.5099
2021-04-11	4-144	N4	0.6246	0.1935	0.0419	0.0141	1.7	2533	2440	4986	0.00267745	1.41018e-06	11.3541	13.9444	0.124653	0.814242	10.0732	3.92881	25.2984	22.5307
2021-04-11	4-145	N4	0.4032	0.1172	0.0201	0.0071	1	2680	2255	4976	0.000845087	3.3808e-07	8.30472	7.49992	0.0715216	1.10731	8.17541	3.07258	15.8046	18.5324
2021-04-11	4-146	N4	0.3548	0.1021	0.0202	0.0061	0.9	2648	2305	4976	0.000977984	3.6156e-07	6.43333	7.40774	0.134525	0.868462	7.75466	2.84348	13.8411	17.5841
2021-04-11	4-147	N4	0.3991	0.1186	0.0213	0.0068	1	2684	2301	4990	0.00142449	6.72917e-07	7.10116	8.41888	0.122022	0.843481	8.11074	2.95151	15.52	18.4939
2021-04-11	4-148	N4	0.3251	0.0974	0.0178	0.0059	0.9	2610	2290	4981	0.000370305	6.40294e-08	6.52351	6.32256	0.0603809	1.03178	7.42469	2.62223	12.8461	16.803
2021-04-11	4-150	N4	0.4784	0.1509	0.0342	0.0117	1.5	2544	2372	4987	0.00188362	4.0071e-07	10.6633	8.78012	0.121216	1.21448	8.9103	3.23664	19.4434	20.3651
2021-04-11	4-151	N4	0.3925	0.1165	0.028	0.0083	1.2	2625	2344	4981	0.000565133	1.34062e-07	9.49525	8.93028	0.0549079	1.06326	8.53961	3.55721	18.4255	19.6968
2021-04-11	4-152	N4	0.524	0.1642	0.0206	0.0074	0.8	2523	2399	4986	0.00242793	7.79711e-07	10.2694	12.6972	0.144968	0.808792	9.16872	3.86875	22.9666	21.446
2021-04-11	4-153	N4	0.5467	0.1668	0.027	0.008	1	2598	2350	4980	0.000450376	1.01417e-07	11.9768	12.2214	0.0289851	0.979981	9.61435	4.00003	24.1982	22.4616
2021-04-11	4-154	N4	0.611	0.1935	0.0446	0.0138	1.8	2611	2344	4987	0.00106552	2.02062e-07	12.0446	13.0923	0.0550206	0.919978	10.4614	3.67383	25.1368	23.3861
2021-04-11	4-155	N4	0.6107	0.1919	0.0347	0.0109	1.4	2639	2329	4973	0.00111517	4.86115e-07	11.8393	11.9277	0.0937345	0.992591	9.77367	3.80948	23.7669	21.945
2021-04-11	4-156	N4	0.6196	0.1934	0.0484	0.0146	1.7	2662	2290	4968	0.00509501	3.44124e-06	10.3902	15.4691	0.231493	0.671673	10.5571	3.57083	25.8592	23.5594
2021-04-11	4-157	N4	0.4414	0.1337	0.0235	0.0069	1.2	2558	2308	4985	0.000682213	1.63417e-07	9.94211	9.26218	0.0566376	1.07341	9.02142	3.50627	19.2043	19.9691
2021-04-11	4-158	N4	0.5282	0.1724	0.0374	0.0135	1.7	2495	2429	4950	0.00211944	9.13105e-07	8.97966	11.0432	0.134333	0.813138	9.31086	3.39917	20.0229	20.4498
2021-04-11	4-159	N4	0.6505	0.2066	0.0376	0.0109	1.4	2625	2348	4984	0.000855692	2.16336e-07	13.2045	12.8204	0.072937	1.02996	10.6082	3.85046	26.0249	23.6888
2021-04-11	4-160	N4	0.7356	0.2326	0.037	0.0094	1.2	2614	2369	4988	0.000947275	2.83227e-07	15.1762	14.5708	0.0630029	1.04155	10.4553	4.29952	29.7471	24.3237
2021-04-11	4-161	N4	0.6329	0.2018	0.025	0.0072	0.9	2574	2406	4989	0.0022509	4.62992e-07	12.8048	15.0556	0.144641	0.8505	10.5708	4.19494	27.8603	24.1308
2021-04-11	4-162	N4	0.7803	0.2512	0.0417	0.0137	1.4	2621	2297	4954	0.00178844	5.12335e-07	17.0969	15.6327	0.0823325	1.09366	10.8852	4.64171	32.7296	25.1643
2021-04-11	4-163	N4	0.4777	0.145	0.0213	0.0061	1.3	2616	2319	4952	0.000624795	1.59384e-07	10.6373	10.5712	0.0603021	1.00625	9.18609	3.68115	21.2085	20.793
2021-04-11	4-164	N4	0.6322	0.1895	0.036	0.0099	1.4	2567	2253	4977	0.000600917	1.69103e-07	12.6838	13.1175	0.042977	0.966935	10.2011	4.06015	25.8013	23.0612
2021-04-11	4-165	N4	0.6676	0.2182	0.0232	0.0071	0.8	2617	2246	4990	0.00138043	9.60314e-07	14.9555	13.9204	0.085357	1.07436	11.1074	4.20161	28.8759	25.1144
2021-04-11	4-166	N4	0.6487	0.2061	0.0255	0.0085	0.9	2712	2244	4986	0.00194149	7.51658e-07	15.1454	13.2046	0.0883452	1.14698	10.9111	4.26698	28.35	24.8068
2021-04-11	4-167	N4	0.4599	0.1604	0.0274	0.0099	1	2520	2219	4978	0.000518356	1.09212e-07	8.50257	8.80061	0.0477837	0.966135	8.75778	3.1219	17.3032	19.6428
2021-04-11	4-168	N4	0.2798	0.0849	0.0195	0.0058	1.1	2624	2316	4981	0.00109085	2.79324e-07	5.4484	6.53687	0.174237	0.833488	7.51218	2.70366	11.9853	16.6533
2021-04-11	4-169	N4	0.6291	0.1729	0.0459	0.0133	1.5	2606	2381	4989	0.000973614	3.56819e-07	13.3442	14.204	0.0779534	0.939466	10.1732	4.25378	27.5482	22.9836
2021-04-11	4-170	N4	0.7628	0.2577	0.0395	0.0139	1.1	2583	2338	4989	0.00211774	8.33744e-07	15.7758	13.6588	0.0895639	1.15499	11.0604	4.27137	29.4346	25.322
2021-04-11	4-171	N4	0.4628	0.1431	0.0321	0.0101	1.1	2537	2383	4992	0.00063051	1.71396e-07	10.1689	10.5878	0.0361628	0.960439	9.67847	3.50953	20.7567	21.6446
2021-04-11	4-172	N4	0.5837	0.1833	0.0258	0.0066	0.9	2452	2445	4982	0.00176177	5.39517e-07	12.0159	13.7777	0.0968056	0.872129	10.3956	3.75169	25.7937	23.2644
2021-04-11	4-173	N4	0.5637	0.182	0.027	0.0093	1.1	2512	2460	4987	0.000918821	6.67538e-07	12.0546	12.833	0.0408647	0.939346	10.2819	3.5122	24.8876	23.1336
2021-04-11	4-174	N4	0.5803	0.1918	0.0287	0.0096	1.1	2537	2371	4988	0.00157618	1.95699e-07	10.0882	11.6643	0.109242	0.86488	9.14382	3.83824	21.7525	20.8761
2021-04-11	4-175	N4	0.4321	0.1178	0.0189	0.0054	1.1	2479	2302	4986	0.000883982	2.3372e-07	7.94434	8.81433	0.0745731	0.901299	8.43235	3.27597	16.7587	18.8076
2021-04-11	4-176	N4	0.5063	0.1762	0.0206	0.0072	1	2617	2307	4987	0.00132913	6.21796e-07	11.3205	10.0253	0.0872003	1.12919	9.18075	3.53047	21.3457	20.7838
2021-04-11	4-177	N4	0.5211	0.1559	0.0308	0.0096	1.4	2625	2345	4986	0.00163495	4.44726e-07	10.6851	12.3198	0.102815	0.867312	9.75467	3.74212	23.0049	21.9074
2021-04-11	4-178	N4	0.6134	0.2006	0.0288	0.0088	1.1	2548	2339	4982	0.000577892	1.9109e-07	12.681	12.6246	0.0764939	1.00447	9.89837	4.11381	25.3056	22.5514
2021-04-11	4-181	N4	0.4196	0.123	0.023	0.0072	0.7	2666	2309	4984	0.00089624	2.68196e-07	9.81	8.91887	0.0778089	1.09992	9.14265	3.50374	18.7289	20.501
2021-04-11	4-182	N4	0.4571	0.1307	0.024	0.0074	1	2531	2451	4991	0.000687813	1.98774e-07	9.74716	10.3092	0.0436033	0.945484	8.95247	3.46713	20.0563	20.3452
2021-04-11	4-184	N4	0.662	0.2157	0.0332	0.0108	1.2	2590	2397	4996	0.00117806	2.71972e-07	12.6973	13.8729	0.077472	0.915257	9.90393	4.22579	26.5702	22.8617
2021-04-11	4-185	N4	0.4946	0.1516	0.0229	0.0075	1	2531	2366	4982	0.00125658	1.8673e-07	9.3877	10.6441	0.111736	0.881961	8.72382	3.51739	20.0318	19.8421
2021-04-11	4-186	N4	0.4125	0.1118	0.0222	0.0066	1	2568	2413	4992	0.000636274	2.34535e-07	9.72203	9.99313	0.0777195	0.972871	9.29663	3.47614	19.7152	20.7315
2021-04-11	4-187	N4	0.5994	0.1761	0.0321	0.0098	1	2562	2309	4995	0.00364509	7.75235e-07	11.4381	15.0831	0.199083	0.758334	10.1299	4.228	26.5212	23.1672
2021-04-11	4-188	N4	0.4774	0.1588	0.0222	0.0072	1	2526	2331	4978	0.00321222	1.15657e-06	8.08629	11.2985	0.237483	0.715695	9.52496	3.36128	19.3848	21.0179
2021-04-11	4-189	N4	0.4761	0.1399	0.0191	0.0053	0.8	2649	2197	4965	0.000502832	1.47719e-07	11.0732	10.7713	0.0463396	1.02803	9.37858	3.83292	21.8445	21.3768
2021-04-11	4-190	N4	0.4765	0.1586	0.0276	0.0091	1.4	2515	2248	4963	0.00371531	1.71769e-06	8.33164	12.0469	0.222006	0.691598	9.22245	3.52138	20.3786	20.7184
2021-04-11	4-191	N4	0.7292	0.2453	0.0372	0.0115	1.3	2588	2332	4994	0.000802384	5.30278e-07	14.2756	14.981	0.0636884	0.952916	10.603	4.33716	29.2565	24.2683
2021-04-11	4-192	N4	0.665	0.2216	0.0384	0.0126	1.5	2627	2319	4971	0.00101422	4.47138e-07	13.4987	13.8549	0.0808532	0.974293	10.2858	4.04067	27.3536	23.3857
2021-04-11	4-195	N4	0.5214	0.1729	0.031	0.0104	1.4	2595	2355	4977	0.00139037	1.90341e-07	10.123	11.5086	0.089294	0.8796	9.19336	3.64453	21.6316	20.8869
2021-04-11	4-196	N4	0.5282	0.1745	0.0348	0.012	1.2	2580	2343	4969	0.000582677	1.59901e-07	9.74536	10.1364	0.0560514	0.961421	8.74271	3.47617	19.8818	20.0311
2021-04-11	4-197	N4	0.4124	0.1251	0.0231	0.0083	1	2470	2268	4995	0.00128354	1.90742e-07	7.51841	8.80195	0.130663	0.854176	8.47463	3.05141	16.3204	18.8703
2021-04-11	4-198	N4	0.6172	0.1768	0.0303	0.0074	1.3	2575	2315	4982	0.00158868	7.46374e-07	14.6275	13.2412	0.0699628	1.10469	10.8774	3.93739	27.8687	24.3366
2021-04-11	4-199	N4	0.5564	0.1894	0.022	0.0075	1	2441	2449	4972	0.00420177	1.60842e-06	8.97102	13.1726	0.242285	0.681038	9.52596	3.78228	22.1436	21.3947
2021-04-11	4-200	N4	0.394	0.122	0.018	0.0063	1	2614	2175	4961	0.00138846	5.87779e-07	7.69646	9.04824	0.0872617	0.850603	8.46742	3.09	16.7447	18.8517
2021-04-11	4-201	N4	0.4154	0.1279	0.0252	0.0087	1.2	2509	2193	4986	0.0015427	4.5669e-07	9.31724	7.99811	0.114008	1.16493	8.52576	3.16535	17.3154	19.151
2021-04-11	4-202	N4	0.6046	0.1866	0.026	0.0079	1	2537	2236	4977	0.00220811	2.8268e-07	12.1116	14.3191	0.12454	0.845836	9.94834	4.02189	26.4307	22.8621
2021-04-11	4-203	N4	0.4693	0.1443	0.0246	0.008	1.1	2526	2269	4990	0.00136334	6.24343e-07	9.34321	8.11506	0.0909861	1.15134	8.48206	3.22586	17.4583	19.2343
2021-04-11	4-204	N4	0.2331	0.0789	0.0145	0.0061	0.9	2538	2228	4777	0.00018831	1.5366e-08	4.59015	4.51517	0.0459105	1.01661	7.09092	2.20684	9.10532	15.5076
2021-04-11	4-207	N4	0.5351	0.1791	0.0245	0.0087	1	2620	2291	4981	0.00130741	1.16391e-06	10.0525	11.2932	0.115975	0.890136	9.19822	3.55313	21.3457	21.1888
2021-04-11	4-208	N4	0.505	0.1612	0.0333	0.0109	1.4	2632	2339	4992	0.000805047	3.52589e-07	9.81429	9.91269	0.051374	0.990073	8.75516	3.30378	19.727	19.9032
2021-04-11	4-209	N4	0.7477	0.2283	0.0485	0.0142	1.6	2701	2255	4986	0.00363999	2.87418e-06	16.7275	13.2268	0.141154	1.26467	11.3518	4.13536	29.9543	25.2466
2021-04-11	4-210	N4	0.8014	0.2355	0.0385	0.0125	1.2	2540	2407	4971	0.003177	3.68704e-06	14.0559	17.2316	0.157547	0.815704	10.4942	4.59849	31.2875	24.2854
2021-04-11	4-211	N4	0.5985	0.1749	0.0333	0.0096	1.1	2584	2397	4989	0.000907135	3.46915e-07	10.9399	11.8282	0.0949862	0.9249	9.7194	3.79075	22.7681	22.0992
2021-04-11	4-212	N4	0.8623	0.2644	0.0441	0.014	1.3	2483	2421	4993	0.00141584	5.66795e-07	16.8349	16.0133	0.0647777	1.05131	10.444	4.63225	32.8482	24.1487
2021-04-11	4-213	N4	0.4401	0.1505	0.0187	0.0065	0.8	2579	2403	4993	0.00149776	5.20131e-07	7.64543	9.14095	0.095215	0.836393	7.91641	3.18274	16.7864	18.0885
2021-04-11	4-214	N4	0.5198	0.1536	0.0343	0.0102	1.1	2705	2236	4975	0.000692176	3.31327e-07	10.8386	10.5892	0.0604724	1.02355	10.3513	3.42849	21.4278	22.9163
2021-04-11	4-215	N4	0.5116	0.1465	0.0302	0.0094	1.3	2484	2396	4976	0.00120615	6.24719e-07	10.9508	10.5523	0.118078	1.03776	9.65025	3.56618	21.503	21.2929
2021-04-11	4-216	N4	0.4748	0.1378	0.0237	0.0083	0.9	2658	2268	4985	0.000814515	2.72818e-07	10.2195	10.2794	0.0969454	0.994168	9.3138	3.48909	20.4989	20.9476
2021-04-11	4-217	N4	0.6947	0.2213	0.0357	0.0116	1.3	2471	2408	4977	0.00178171	5.11658e-07	12.0399	13.8214	0.105984	0.871103	10.3236	3.95521	25.8613	23.2617
2021-04-11	4-218	N4	0.4212	0.1277	0.0229	0.0075	1	2564	2329	4968	0.00278939	1.51722e-06	6.77918	9.52901	0.213475	0.711426	8.42232	3.09593	16.3082	18.8745
2021-04-11	4-219	N4	0.6803	0.2272	0.0412	0.0143	1.4	2606	2358	4987	0.002782	4.45232e-07	11.2987	14.0807	0.166515	0.802428	10.2985	3.91997	25.3794	23.4192
2021-04-11	4-220	N4	0.5543	0.1573	0.0216	0.0068	0.8	2470	2488	4972	0.00130712	5.70448e-07	12.3949	12.9819	0.134385	0.954781	10.7224	3.96433	25.3767	23.9155
2021-04-11	4-221	N4	0.4324	0.125	0.0179	0.0052	0.8	2561	2420	4992	0.00145205	3.3439e-07	9.35764	10.8095	0.159339	0.865688	9.77277	3.4762	20.1671	21.8335
2021-04-11	4-222	N4	0.826	0.2678	0.0457	0.0153	1.4	2616	2344	4979	0.000744987	7.32607e-07	15.3831	16.0291	0.0537115	0.959703	11.1656	4.05713	31.4122	25.521
2021-04-11	4-223	N4	0.561	0.1855	0.0282	0.0091	1.2	2565	2392	4983	0.000484735	7.45129e-08	10.7752	11.1634	0.0544215	0.965224	9.11825	3.55156	21.9385	20.7699
2021-04-11	4-227	N4	0.4964	0.1549	0.0228	0.007	1	2601	2293	4987	0.00137973	3.68461e-07	10.2796	8.98217	0.0828395	1.14445	8.87249	3.23103	19.2618	20.3869
2021-04-11	4-228	N4	0.7127	0.2474	0.0442	0.0149	1.5	2578	2325	4969	0.00103046	4.87723e-07	12.7616	13.5521	0.0704918	0.941672	10.3958	4.10823	26.3137	23.7989
2021-04-11	4-229	N4	0.4485	0.1462	0.0188	0.0061	0.9	2546	2356	4977	0.000345241	5.36127e-08	8.31916	8.35605	0.0323579	0.995585	7.84144	3.32175	16.6752	17.7162
2021-04-11	4-230	N4	0.9229	0.3109	0.059	0.0202	1.4	2667	2258	4993	0.00108027	9.37083e-07	17.2828	18.0948	0.0479654	0.955125	11.2758	4.81457	35.3777	26.3517
2021-04-11	4-231	N4	0.3415	0.1019	0.0147	0.0052	0.7	2601	2271	4987	0.00142263	4.27643e-07	6.71098	8.12961	0.101329	0.825498	7.59903	2.99711	14.8406	17.4045
2021-04-11	4-232	N4	0.7113	0.2263	0.0476	0.0154	1.6	2325	2635	4967	0.000965322	3.38154e-07	14.259	13.9238	0.0543923	1.02408	10.7618	3.90158	28.1828	23.91
2021-04-11	4-233	N4	0.3687	0.1127	0.0202	0.0071	1.2	2308	2602	4987	0.00030632	3.2348e-08	7.80104	7.93808	0.0399988	0.982736	7.91457	3.22512	15.7391	17.826
2021-04-11	4-234	N4	0.8281	0.2713	0.0382	0.0125	1.2	2217	2697	4983	0.000599282	1.96571e-07	15.2737	15.6067	0.0386434	0.978663	10.9959	4.41244	30.8804	25.2993
2021-04-11	4-235	N4	0.5221	0.1396	0.0245	0.0077	0.9	2165	2768	4994	0.00190105	1.05608e-06	10.655	8.84773	0.108344	1.20427	9.644	3.38331	19.5028	21.709
2021-04-11	4-236	N4	0.5373	0.1941	0.0247	0.0085	1	2295	2645	4995	0.00197566	6.34695e-07	11.2483	9.33968	0.132758	1.20436	8.96825	3.40896	20.588	20.4321
2021-04-11	4-238	N4	1.003	0.3518	0.0394	0.0139	1	2542	2375	4975	0.00357385	7.41589e-07	17.0157	20.5891	0.138597	0.826443	12.1066	4.72735	37.6048	28.0367
2021-04-11	4-240	N4	0.6002	0.1771	0.0253	0.0076	1.1	2501	2371	4978	0.00175487	9.76685e-07	13.152	11.4927	0.092333	1.14438	9.96016	3.82666	24.6447	22.3614
2021-04-11	4-241	N4	0.5911	0.1755	0.0339	0.0104	1.3	2528	2425	4973	0.00192892	7.10218e-07	11.0556	12.9677	0.0873582	0.852549	9.92872	3.70081	24.0232	22.1332
2021-04-11	4-243	N4	0.5861	0.1948	0.0334	0.0113	1	2661	2262	4986	0.00375696	2.54609e-06	9.68393	13.4021	0.228011	0.722571	10.0492	3.91085	23.086	22.7611
2021-04-11	4-244	N4	0.6073	0.1978	0.0349	0.0114	1.4	2656	2318	4996	0.00132763	1.36668e-06	11.9705	13.2516	0.090661	0.903321	9.73151	3.87966	25.2221	22.3051
2021-04-11	4-245	N4	0.4733	0.1481	0.0298	0.0086	1.4	2461	2415	4983	0.00119352	5.82334e-07	9.06073	10.2158	0.0906942	0.886932	9.68645	3.37754	19.2766	21.3608
2021-04-11	4-246	N4	0.4433	0.1487	0.0205	0.0066	0.8	2601	2378	4988	0.000342261	6.05442e-08	9.86789	9.57892	0.0309419	1.03017	9.24271	3.58212	19.4468	21.1664
2021-04-11	4-248	N4	0.5206	0.1636	0.0237	0.0067	1.1	2500	2393	4988	0.00115163	2.99327e-07	9.9621	11.1136	0.0839165	0.896384	9.19709	3.70159	21.0757	20.7769
2021-04-11	4-251	N4	0.488	0.1564	0.0282	0.0071	1.3	2533	2423	5011	0.00254969	9.44597e-07	7.74801	10.2977	0.194594	0.752402	9.0421	3.05832	18.0457	19.9225
2021-04-11	4-252	N4	0.5303	0.1705	0.039	0.0096	1.6	2502	2287	4959	0.00104807	4.32106e-07	10.5175	9.46962	0.0726264	1.11066	9.38453	3.32385	19.9871	20.5497
2021-04-11	4-253	N4	0.2981	0.0994	0.0116	0.0033	0.8	2165	2081	4315	0.0021211	4.66618e-07	4.74801	6.86911	0.225395	0.691211	6.12886	2.76055	11.6171	14.5617
2021-04-11	4-254	N4	0.5335	0.1681	0.0262	0.0088	1.4	2635	2271	4983	0.00072314	1.54681e-07	11.2947	10.5754	0.0530693	1.06802	9.39839	3.62281	21.8701	21.0666
2021-04-11	4-255	N4	0.8368	0.2607	0.0315	0.0101	1.1	2551	2292	4970	0.000982872	3.94662e-07	15.9354	15.2829	0.0698837	1.04269	11.5506	4.18235	31.2183	25.5098
2021-04-11	4-256	N4	0.7403	0.2246	0.0337	0.0108	1.1	2256	2574	4979	0.00895733	9.603e-06	9.37287	18.3205	0.402698	0.511606	10.623	4.18882	27.6934	24.0549
2021-04-11	4-257	N4	0.7112	0.2377	0.0408	0.0124	1.4	2630	2330	4964	0.00146662	1.10669e-06	13.4258	14.3782	0.110157	0.933761	10.7739	4.16235	27.8039	24.2674
2021-04-11	4-258	N4	0.4145	0.1452	0.0257	0.0092	1.2	2644	2291	4980	0.00155759	1.16131e-07	7.86578	9.42337	0.153893	0.83471	8.76148	3.18004	17.2891	19.6066
2021-04-11	4-259	N4	0.466	0.1636	0.0281	0.0102	1.3	2531	2259	4980	0.00120598	3.53329e-07	9.97542	8.85359	0.0727615	1.12671	7.99864	3.52165	18.829	18.7161
2021-04-11	4-260	N4	0.5137	0.1809	0.0172	0.0065	0.8	2605	2348	4979	0.00102686	3.69455e-07	9.5301	10.141	0.0830651	0.93976	8.60209	3.45846	19.6711	19.6212
2021-04-11	4-261	N4	0.4799	0.1698	0.0151	0.0054	0.8	2620	2355	4981	0.00207888	4.88912e-07	7.93568	10.0145	0.151147	0.792418	7.97072	3.46745	17.9502	18.4251
2021-04-11	4-264	N4	0.347	0.1207	0.0129	0.0042	0.7	2597	2261	4950	0.000715007	1.00944e-07	6.57061	7.2323	0.0874126	0.908509	7.62336	2.8888	13.8029	17.1409
2021-04-11	4-265	N4	0.5194	0.1603	0.0344	0.0117	1.4	2632	2299	4950	0.000310408	4.8783e-08	9.46861	9.37094	0.031994	1.01042	9.37146	3.19178	18.8396	20.5232
2021-04-11	4-266	N4	0.8477	0.258	0.0344	0.0109	1.1	2501	2353	4997	0.00266151	2.63886e-06	15.8627	18.2749	0.0914	0.868007	11.2373	4.58371	34.1376	25.8875
2021-04-11	4-267	N4	0.4649	0.1516	0.0201	0.0066	0.8	2484	2321	4991	0.00171461	7.53549e-07	8.55954	10.2733	0.128455	0.83318	8.73028	3.44439	18.8329	19.7785
2021-04-11	4-268	N4	0.4359	0.1272	0.0244	0.0076	1.1	2463	2243	4982	0.000481355	1.0526e-07	9.25187	9.27488	0.0505455	0.997518	8.64875	3.29501	18.5267	19.3577
2021-04-11	4-269	N4	0.7214	0.2618	0.0419	0.0141	1.5	2585	2330	4987	0.00135751	5.62466e-07	12.6983	14.0487	0.074509	0.903876	9.94328	3.93421	26.747	22.9954
2021-04-11	4-270	N4	0.454	0.1626	0.0245	0.0078	1.1	2689	2255	4961	0.000657395	2.61906e-07	9.02864	8.81571	0.0722331	1.02415	8.83988	3.23233	17.8443	20.1689
2021-04-11	4-271	N4	0.4746	0.1536	0.028	0.0089	1.3	2640	2309	4978	0.000867081	4.69131e-07	9.99693	10.7474	0.102326	0.930168	10.0067	3.60213	20.7444	22.1655
2021-04-11	4-272	N4	0.7633	0.2655	0.0514	0.0172	1.7	2545	2373	4979	0.00108506	3.54109e-07	13.7695	14.0005	0.0644886	0.983499	9.76661	4.11381	27.7701	22.4462
2021-04-11	4-273	N4	0.4884	0.1698	0.0249	0.0082	1	2553	2327	4978	0.000736042	1.72134e-07	9.74952	10.444	0.0568339	0.933504	9.38663	3.48815	20.1935	21.2061
2021-04-11	4-274	N4	0.6163	0.2019	0.0262	0.0093	1	2644	2297	4983	0.00127295	2.4188e-07	13.4492	12.1795	0.0594079	1.10425	9.71579	3.97013	25.6287	22.4988
2021-04-11	4-275	N4	0.4618	0.1393	0.0264	0.009	1	2524	2385	4989	0.00169942	5.60939e-07	9.266	10.9654	0.13684	0.84502	9.19254	3.50867	20.2314	20.7834
2021-04-11	4-276	N4	0.5637	0.1718	0.0282	0.0095	1	2410	2408	4984	0.000952674	2.23816e-07	11.6506	12.5852	0.0593635	0.92574	9.47332	3.86052	24.2359	21.7208
2021-04-11	4-277	N4	0.6706	0.2161	0.0432	0.0138	1.5	2550	2397	4992	0.000904847	4.76319e-07	13.1779	13.9247	0.0674261	0.946373	10.594	4.05571	27.1026	23.7611
2021-04-11	4-278	N4	0.4577	0.1583	0.0228	0.0078	1	2590	2307	4982	0.0010362	2.94052e-07	8.55396	9.58945	0.120962	0.892018	8.50491	3.39297	18.1434	19.2507
2021-04-11	4-279	N4	0.5788	0.177	0.0363	0.0116	1.4	2548	2387	4993	0.00229104	1.19156e-06	11.1448	13.4126	0.136854	0.830923	9.98824	3.96117	24.5574	22.3714
2021-04-11	4-280	N4	0.8863	0.3191	0.0478	0.0167	1.5	2638	2324	4985	0.00100925	5.638e-07	16.5342	16.5488	0.0772356	0.999118	11.4466	4.30564	33.083	26.2793
2021-04-11	4-281	N4	0.4088	0.1402	0.0197	0.0073	0.9	2623	2291	4983	0.000996788	3.02964e-07	8.2842	7.48499	0.0966858	1.10678	7.52449	3.29753	15.7692	17.4865
2021-04-11	4-282	N4	0.6747	0.2416	0.0311	0.0113	1.2	2669	2291	4977	0.00215315	1.63408e-06	11.8976	13.8058	0.115788	0.86178	10.3565	3.77992	25.7034	23.3975
2021-04-11	4-283	N4	0.4617	0.1641	0.0329	0.0121	1.5	2568	2136	4963	0.000709865	1.97622e-07	9.19744	8.55339	0.0662152	1.0753	7.97675	3.27704	17.7508	18.4662
2021-04-11	4-284	N4	0.626	0.1988	0.0393	0.0132	1.4	2560	2412	4976	0.00267545	1.26872e-06	11.3697	14.0097	0.127744	0.811564	9.79107	3.78478	25.3794	22.5285
2021-04-11	4-285	N4	0.4392	0.148	0.0223	0.0073	1.1	2563	2374	4988	0.00294596	5.37729e-07	8.19097	11.1369	0.216375	0.735478	9.19006	3.45565	19.3279	20.6674
2021-04-11	4-286	N4	0.3094	0.1024	0.0126	0.005	0.7	2466	2348	4860	0.00223409	1.35288e-06	5.83857	8.02473	0.160792	0.727573	7.00071	2.93144	13.8633	16.3427
2021-04-11	4-287	N4	0.3578	0.1286	0.0156	0.0064	0.8	2537	2396	4986	0.000780613	3.11581e-07	7.83412	7.30903	0.10826	1.07184	8.46776	2.96441	15.1432	18.9
2021-04-11	4-288	N4	0.3286	0.1099	0.0156	0.0057	1	2610	2274	4986	0.00204049	6.66256e-07	5.72287	7.76336	0.179818	0.737164	7.70787	2.77529	13.4862	17.3
2021-04-11	4-290	N4	0.5233	0.1671	0.0324	0.0104	1.3	2505	2428	4987	0.00281147	2.00378e-06	9.96928	12.7646	0.204362	0.781009	9.9865	3.68324	22.7339	22.1957
2021-04-11	4-291	N4	0.6044	0.1859	0.0378	0.0113	1.5	2587	2361	4989	0.00145916	3.64355e-07	13.4104	11.9514	0.0827897	1.12207	10.1381	3.78409	25.3618	23.1379
2021-04-11	4-292	N4	0.7045	0.2165	0.0385	0.0113	1.4	2490	2397	4981	0.00283083	1.56422e-06	13.124	15.9176	0.117017	0.8245	10.8296	4.22455	29.0416	24.7695
2021-04-11	4-293	N4	0.4388	0.1299	0.0345	0.0096	1.6	2540	2332	4968	0.00176005	4.3491e-07	8.659	10.3463	0.147323	0.836915	9.21375	3.4705	19.0053	20.6912
2021-04-11	4-294	N4	0.5606	0.1693	0.0292	0.0092	1.2	2523	2342	4981	0.00184417	2.04635e-06	11.4316	13.2657	0.11591	0.861742	10.204	3.64574	24.6973	22.7908
2021-04-11	4-295	N4	0.291	0.0942	0.0179	0.0058	1.1	2576	2335	4944	0.000256957	1.5505e-08	5.89667	5.81074	0.0408776	1.01479	7.76117	2.53017	11.7074	16.802
2021-04-11	4-296	N4	0.5509	0.1644	0.027	0.0082	1.1	2623	2332	4989	0.00271427	1.24315e-06	13.7081	11.0121	0.12068	1.24482	10.2609	3.83255	24.7201	23.079
2021-04-11	4-297	N4	0.372	0.1111	0.016	0.0048	0.9	2666	2304	4985	0.000424752	1.0337e-07	7.56379	7.1612	0.0511885	1.05622	7.8685	2.9612	14.725	17.6949
2021-04-11	4-298	N4	0.4287	0.127	0.0235	0.0076	1.1	2654	2315	4972	0.00190024	7.78773e-07	7.41149	9.28938	0.157697	0.797845	8.45543	3.11566	16.7009	18.8967
2021-04-11	4-299	N4	0.3855	0.1157	0.0231	0.0071	1.2	2526	2268	4946	0.00240077	5.00824e-07	6.21964	8.62041	0.199313	0.721502	7.7462	2.85963	14.84	17.5983
2021-04-11	4-300	N4	0.4037	0.1193	0.0216	0.0065	1.1	2730	2213	4979	0.00083017	1.50624e-07	8.01393	7.57455	0.0864397	1.05801	8.21954	3.03625	15.5885	18.4472
2021-04-11	4-301	N4	0.5463	0.1768	0.0441	0.0134	1.9	2525	2237	4980	0.000928662	1.62545e-07	10.3897	10.9813	0.0861508	0.946125	9.17388	3.62283	21.371	20.5652
2021-04-11	4-302	N4	0.4741	0.1546	0.0309	0.0093	1.4	2661	2328	4992	0.00205013	6.40545e-07	10.6268	8.57673	0.132849	1.23903	8.84052	3.40512	19.2036	19.7335
2021-04-11	4-303	N4	0.4323	0.1351	0.0252	0.008	1.2	2641	2229	4994	0.000442515	7.83199e-08	8.10452	8.47194	0.0423137	0.956631	8.31534	3.00817	16.5765	18.819
2021-04-11	4-304	N4	0.6551	0.2077	0.0415	0.0133	1.6	2410	2399	4989	0.00115269	6.4433e-07	12.7119	13.8146	0.0567319	0.920177	9.59709	4.17413	26.5265	22.093
2021-04-11	4-305	N4	0.4338	0.141	0.0216	0.0078	1.1	2568	2414	4991	0.00219095	7.05764e-07	10.2728	8.08231	0.139154	1.27102	8.39545	3.35937	18.3551	19.0129
2021-04-11	4-306	N4	0.5106	0.1592	0.0363	0.0116	1.7	2501	2362	4980	0.000520157	1.20734e-07	10.1956	9.85791	0.0536153	1.03426	9.24913	3.23086	20.0535	20.4901
2021-04-11	4-307	N4	0.498	0.1482	0.0406	0.0114	1.6	2352	2232	4717	0.0012306	4.54425e-07	10.374	9.27243	0.0846028	1.1188	9.11779	3.58126	19.6465	20.2475
2021-04-11	4-308	N4	0.5004	0.1546	0.0304	0.0119	1.3	2577	2335	4996	0.000555761	1.43591e-07	9.88297	9.96891	0.0672165	0.991379	9.41405	3.2608	19.8519	20.7955
2021-04-11	4-309	N4	0.5191	0.1636	0.039	0.0099	1.8	2575	2314	4982	0.000865435	2.75406e-07	9.87818	10.3866	0.0700589	0.95105	8.94667	3.26145	20.2648	20.2579
2021-04-11	4-310	N4	0.4558	0.1482	0.0275	0.0086	1.3	2686	2248	4974	0.000499719	8.83285e-08	8.36535	8.66394	0.0416623	0.965537	8.031	3.11131	17.0293	18.3682
2021-04-11	4-311	N4	0.5134	0.1612	0.0294	0.009	1.3	2643	2311	4959	0.0012091	3.9676e-07	9.06007	10.2589	0.0970701	0.883146	8.88803	3.49179	19.3189	20.093
2021-04-11	4-312	N4	0.4788	0.1489	0.028	0.0084	1.3	2566	2372	4982	0.000867097	3.28778e-07	9.23272	10.0981	0.11321	0.914302	9.12903	3.49704	19.3308	20.3617
2021-04-11	4-313	N4	0.4865	0.1584	0.0232	0.0071	1	2624	2173	4994	0.000904649	3.26381e-07	9.43093	10.0433	0.0666986	0.939025	8.94161	3.39204	19.4743	20.2538
2021-04-11	4-314	N4	0.5244	0.1686	0.0275	0.0092	1	2707	2243	4996	0.00163126	4.31243e-07	10.2622	11.719	0.104406	0.875684	9.13785	3.73065	21.9812	21.13
2021-04-11	4-315	N4	0.5578	0.1872	0.0258	0.0093	1	2608	2195	4981	0.00140188	4.80846e-07	11.7521	10.3595	0.0779377	1.13442	9.26589	3.46783	22.1116	21.4921
2021-04-11	4-316	N4	0.4406	0.1302	0.0243	0.008	1.1	2450	2399	4985	0.00132127	2.84012e-07	8.91722	10.2351	0.0813815	0.871242	8.75065	3.32127	19.1523	19.565
2021-04-11	4-317	N4	0.2884	0.0857	0.0132	0.0041	0.9	2313	2227	4813	0.000650876	7.52738e-08	5.99006	6.64094	0.0898343	0.90199	7.12307	2.68574	12.631	16.0845
2021-04-11	4-318	N4	0.2967	0.089	0.0175	0.0042	1.1	2619	2348	4989	0.000916707	4.25831e-07	6.07664	6.9656	0.0947974	0.872379	7.58999	2.66352	13.0422	16.9796
2021-04-11	4-319	N4	0.5835	0.1854	0.0369	0.0106	1.5	2597	2349	4979	0.0023909	1.26438e-06	10.8302	13.1108	0.143194	0.826056	9.98838	3.85945	23.941	22.2307
2021-04-11	4-320	N4	0.652	0.2143	0.0456	0.0137	1.7	2668	2281	4964	0.00239557	1.31486e-06	11.9359	14.3307	0.100744	0.832889	10.5524	3.79031	26.2667	23.6379
2021-04-11	4-321	N4	0.6141	0.2006	0.0422	0.0129	1.7	2630	2313	4971	0.00271458	5.22355e-07	10.967	13.6815	0.174724	0.801591	10.3598	3.86252	24.6485	23.1631
2021-04-11	4-322	N4	0.2831	0.0845	0.017	0.0047	1	2562	2232	4829	0.00147054	5.77069e-07	7.06856	5.61678	0.121734	1.25847	7.34474	2.81765	12.6853	16.4264
2021-04-11	4-323	N4	0.3494	0.1083	0.0222	0.0067	1.2	2628	2334	4977	0.00141891	2.34804e-07	6.54277	7.96119	0.159815	0.821833	7.7816	3.02702	14.504	17.5479
2021-04-11	4-324	N4	0.4995	0.1515	0.0298	0.0091	1.1	2537	2427	4982	0.000678967	9.97575e-08	9.44044	9.98505	0.0638154	0.945458	9.19781	3.43722	19.4255	20.4689
2021-04-11	4-325	N4	0.5748	0.1772	0.0371	0.0122	1.4	2600	2382	4984	0.0025498	6.70558e-07	14.4044	11.8548	0.115334	1.21507	10.4254	3.78753	26.2592	23.6445
2021-04-11	4-326	N4	0.6525	0.2108	0.0381	0.0122	1.3	2600	2382	4984	0.0025498	6.70558e-07	14.4044	11.8548	0.115334	1.21507	10.4254	3.78753	26.2592	23.6445
2021-04-11	4-327	N4	0.7337	0.2413	0.0347	0.0108	1.1	2650	2246	4991	0.000766808	1.94978e-07	14.3272	13.9529	0.0419165	1.02682	10.6179	4.21304	28.2801	24.34
2021-04-11	4-328	N4	0.7948	0.2682	0.0344	0.0115	1.1	2530	2336	4979	0.00248407	7.44568e-07	14.0871	16.5712	0.104634	0.850097	10.9018	4.43019	30.6583	24.969
2021-04-11	4-329	N4	0.4501	0.1469	0.0288	0.0089	1.3	2474	2303	4975	0.00197968	7.36135e-07	8.43885	10.4055	0.118091	0.811002	9.37751	3.24246	18.8443	20.4825
2021-04-11	4-330	N4	0.5668	0.1817	0.0231	0.008	1	2629	2189	4983	0.000832752	1.3935e-07	10.518	9.68567	0.0561875	1.08593	8.82057	3.44615	20.2037	20.4102
2021-04-11	4-331	N4	0.7303	0.2328	0.0434	0.013	1.5	2665	2284	4984	0.00198144	1.07012e-06	15.4492	13.4678	0.101277	1.14712	10.6742	4.26674	28.917	24.1447
2021-04-11	4-332	N4	0.5687	0.186	0.039	0.0118	1.4	2714	2294	4995	0.00133688	8.1194e-07	11.5072	12.3805	0.147399	0.929468	10.0279	3.92503	23.8877	22.9818
2021-04-11	4-334	N4	0.5591	0.1891	0.0403	0.0123	1.5	2548	2388	4952	0.000345856	6.18129e-08	9.54992	9.70388	0.0351568	0.984134	9.24797	3.41127	19.2538	20.476
2021-04-11	4-335	N4	0.3583	0.0984	0.0243	0.0072	1	2525	2431	4973	0.0004944	9.22196e-08	7.98814	7.65363	0.0519047	1.04371	7.53665	3.21899	15.6418	17.3549
2021-04-11	4-336	N4	0.3762	0.1076	0.021	0.0067	0.9	2301	2341	4894	0.000530549	1.25775e-07	7.50843	7.96068	0.0394788	0.943189	7.23676	3.17046	15.4691	16.8065
2021-04-11	4-337	N4	0.5809	0.1778	0.0347	0.0105	1.3	2545	2408	4957	0.000780307	2.63268e-07	10.8836	11.3583	0.0600965	0.958208	9.34514	3.63205	22.2418	21.2531
2021-04-11	4-338	N4	0.5039	0.1561	0.0352	0.0109	1.4	2494	2309	4983	0.000826745	2.72644e-07	9.16663	9.70044	0.0595993	0.94497	8.18576	3.47312	18.8671	18.9485
2021-04-11	4-339	N4	0.3603	0.1009	0.0227	0.0066	0.9	2566	2315	4923	0.000980795	2.09183e-07	7.98603	7.03998	0.0723967	1.13438	7.1231	3.09897	15.026	16.6365
2021-04-11	4-340	N4	0.4426	0.1369	0.0239	0.0074	1.1	2434	2198	4689	0.000938421	2.9631e-07	7.29877	8.21119	0.0626391	0.888882	7.07711	3.30799	15.51	16.9271
2021-04-11	4-341	N4	0.5411	0.1665	0.0295	0.0097	1.3	2543	2307	4981	0.000679162	2.93563e-07	9.69733	10.2746	0.0416984	0.943814	8.49333	3.59529	19.972	19.6603
2021-04-11	4-342	N4	0.3593	0.1057	0.0249	0.0074	1	2583	2426	4989	0.00188312	5.54946e-07	6.20136	8.07907	0.204841	0.767584	8.0099	3.00464	14.2804	17.9068
2021-04-11	4-343	N4	0.3833	0.1204	0.0207	0.0064	1	2636	2316	4995	0.000415629	7.60403e-08	7.10343	6.92185	0.0534818	1.02623	7.45647	2.95504	14.0253	16.9792
2021-04-11	4-344	N4	0.4187	0.1347	0.0204	0.0068	1.1	2620	2290	4979	0.00126982	3.05107e-07	8.24393	6.97497	0.085988	1.18193	7.48215	3.14076	15.2189	17.1157
2021-04-11	4-345	N4	0.6336	0.1946	0.0331	0.0101	1.1	2625	2319	4984	0.000744316	1.99149e-07	12.7468	12.0511	0.0427529	1.05773	10.132	3.81152	24.7979	22.8944
2021-04-11	4-346	N4	0.5365	0.1632	0.0358	0.0112	1.3	2595	2324	4996	0.00268438	5.56367e-07	9.32311	12.0075	0.170993	0.776442	9.24088	3.63303	21.3306	20.9172
2021-04-11	4-347	N4	0.4502	0.1454	0.0218	0.0074	1	2464	2260	4978	0.00178958	7.65984e-07	7.47842	8.77819	0.175129	0.851932	7.6989	3.22217	16.2566	17.802
2021-04-11	4-348	N4	0.4854	0.1424	0.0324	0.0103	1.3	2599	2382	4991	0.000991216	3.62003e-07	10.2545	9.9387	0.0848341	1.03177	8.98571	3.43257	20.1932	20.0928
2021-04-11	4-349	N4	0.6166	0.1804	0.0388	0.0122	1.4	2605	2325	4997	0.00067679	2.26067e-07	11.9022	12.5511	0.0602719	0.948298	10.0636	3.65435	24.4533	22.5379
2021-04-11	4-350	N4	0.5388	0.1663	0.0463	0.0143	1.7	2496	2404	4977	0.000674866	1.31483e-07	9.77668	9.81362	0.0589506	0.996236	9.22472	3.39533	19.5903	20.2782
2021-04-11	4-351	N4	0.4092	0.1313	0.0238	0.0075	1.2	2612	2361	4993	0.00148387	4.56621e-07	9.1071	7.63818	0.0870195	1.19231	7.86038	3.11126	16.7453	18.1014
2021-04-11	4-352	N4	0.5277	0.1586	0.027	0.0087	1.2	2478	2358	4993	0.000490125	1.22349e-07	9.83595	9.71704	0.0307097	1.01224	8.29374	3.79952	19.553	19.1591
2021-04-11	4-353	N4	0.6265	0.1828	0.0398	0.0123	1.7	2479	2407	4991	0.00187449	6.61808e-07	12.989	14.8332	0.0856151	0.87567	10.5682	3.99249	27.8222	23.7208
2021-04-11	4-354	N4	0.5221	0.1587	0.0413	0.0119	1.5	2593	2353	4994	0.0017884	7.30611e-07	9.74635	11.5347	0.0984393	0.844958	9.18051	3.42487	21.2811	21.0304
2021-04-11	4-355	N4	0.6005	0.1955	0.0386	0.0116	1.4	2600	2296	4982	0.000258125	3.78976e-08	11.6952	11.5167	0.0302474	1.0155	9.80867	3.73064	23.2118	22.0773
2021-04-11	4-356	N4	0.5682	0.18	0.0322	0.0108	1.2	2576	2350	4974	0.00135571	3.35842e-07	12.435	11.0874	0.0704532	1.12155	9.21905	3.7846	23.5224	21.0635
2021-04-11	4-357	N4	0.5444	0.1717	0.0484	0.0163	2.1	2623	2337	5024	0.00239058	5.15345e-07	8.8509	11.2415	0.146391	0.787343	9.236	3.24209	20.0924	20.407
2021-04-11	4-358	N4	0.4869	0.1554	0.026	0.0081	1.1	2586	2373	4981	0.00140976	2.9097e-07	9.26116	10.6706	0.112823	0.86791	9.27483	3.47228	19.9318	20.499
2021-04-11	4-359	N4	0.5316	0.1538	0.0381	0.0116	1.4	2587	2289	4984	0.00108578	2.23534e-07	10.9489	9.92949	0.0707351	1.10267	9.37738	3.58687	20.8784	20.8045
2021-04-11	4-360	N4	0.5156	0.1626	0.0383	0.0121	1.7	2536	2428	4981	0.00258353	1.00208e-06	9.25186	11.8063	0.143907	0.783636	9.13512	3.57799	21.0582	20.3095
2021-05-16	5-001	N5	0.4748	0.1967	0.0407	0.0162	1.8	2501	2458	4972	0.001043	2.06557e-07	9.45053	10.1418	0.0717124	0.931841	9.5547	3.4076	19.5923	20.9106
2021-05-16	5-002	N5	0.2989	0.1227	0.021	0.0068	1.2	2367	2276	4725	0.00036817	4.44075e-08	6.7678	6.58688	0.0584684	1.02747	7.35034	2.75275	13.3547	16.3206
2021-05-16	5-003	N5	0.6015	0.2455	0.0443	0.0212	1.6	2573	2393	4976	0.0015248	6.21382e-07	12.6763	12.6059	0.120411	1.00558	10.5393	3.81456	25.2822	23.2255
2021-05-16	5-004	N5	0.5492	0.2272	0.04	0.0151	1.6	2584	2391	4987	0.00125796	3.0674e-07	10.9463	12.1688	0.101929	0.899537	10.2981	3.64135	23.1152	22.5392
2021-05-16	5-005	N5	0.7725	0.3207	0.0561	0.0207	1.8	2564	2398	4983	0.000402292	1.16086e-07	15.5872	15.6489	0.0264331	0.996058	11.7669	4.30849	31.2361	25.9124
2021-05-16	5-007	N5	0.3518	0.1448	0.0275	0.0114	1.4	2543	2416	4985	0.000678715	1.09185e-07	8.14438	7.46703	0.0742593	1.09071	8.64703	2.94017	15.6114	19.09
2021-05-16	5-008	N5	0.3031	0.1293	0.018	0.0059	1	2432	2256	4820	0.00091339	2.94906e-07	6.92891	6.01566	0.111036	1.15181	7.39246	2.83552	12.9446	16.4759
2021-05-16	5-009	N5	0.6717	0.2805	0.0466	0.0188	1.6	2489	2421	4995	0.000808959	1.5716e-07	13.5228	13.64	0.0537972	0.991411	10.707	3.93432	27.1628	23.8245
2021-05-16	5-010	N5	0.5051	0.206	0.0325	0.0116	1.3	2487	2388	4981	0.00278007	1.41788e-06	9.77635	12.5361	0.144598	0.779855	9.2219	3.72179	22.3125	21.493
2021-05-16	5-011	N5	0.3993	0.1693	0.0295	0.0109	1.4	2556	2386	4972	0.0002542	3.97254e-08	8.37135	8.24143	0.0369411	1.01576	8.27667	3.20662	16.6128	18.4687
2021-05-16	5-019	N5	0.5878	0.2484	0.0415	0.0169	1.6	2517	2324	4987	0.00189406	8.98722e-07	13.1715	11.2832	0.0842564	1.16735	10.3836	3.76794	24.4547	23.2867
2021-05-16	5-020	N5	0.7423	0.3169	0.0408	0.0142	1.4	2486	2355	4992	0.0023424	2.27697e-06	16.4031	14.0818	0.1046	1.16484	11.1539	4.38369	30.4849	25.2326
2021-05-16	5-022	N5	0.7607	0.333	0.0436	0.0196	1.5	2592	2362	4991	0.0019307	1.23065e-06	14.6082	12.8597	0.0993062	1.13596	10.4373	3.93394	27.4679	23.4311
2021-05-16	5-024	N5	0.3912	0.1634	0.0285	0.0108	1.4	2557	2400	4976	0.000672059	9.34011e-08	9.07969	8.40804	0.0536495	1.07988	8.59311	2.96119	17.4877	18.9931
2021-05-16	5-025	N5	0.5758	0.2433	0.0368	0.0121	1.3	2601	2290	4981	0.000973605	2.38707e-07	12.2611	12.8821	0.0726762	0.951791	10.4766	3.67085	25.1432	23.4632
2021-05-16	5-026	N5	0.521	0.2229	0.0331	0.0105	1.1	2664	2244	4978	0.00358172	1.81047e-06	13.0008	9.41946	0.196175	1.38021	10.3875	3.47362	22.4203	23
2021-05-16	5-027	N5	0.6083	0.2546	0.0405	0.0138	1.3	2646	2327	4988	0.00238335	7.12296e-07	12.0874	14.4652	0.119286	0.835622	10.7457	3.89394	26.5527	24.2339
2021-05-16	5-028	N5	0.5239	0.2202	0.0317	0.0129	1.3	2504	2473	4993	0.000771888	3.70226e-07	11.1269	11.6884	0.0798975	0.951962	9.52404	3.86837	22.8154	21.4574
2021-05-16	5-029	N5	0.3622	0.148	0.0196	0.0096	1.1	2537	2396	4979	0.000961428	5.13536e-07	8.97896	8.19661	0.0674267	1.09545	8.57687	3.05761	17.1756	19.2137
2021-05-16	5-030	N5	0.4726	0.2065	0.0368	0.0114	1.6	2570	2395	4990	0.00211668	6.30057e-07	11.1068	8.99776	0.132336	1.2344	9.35476	3.39706	20.1046	20.625
2021-05-16	5-031	N5	0.5216	0.2246	0.0341	0.0119	1.5	2550	2428	4985	0.00271862	1.04032e-06	12.8934	10.1755	0.14975	1.2671	9.85406	3.66396	23.069	21.8437
2021-05-16	5-032	N5	0.3866	0.169	0.0266	0.0088	1.1	2519	2418	4982	0.00289587	9.69713e-07	7.00939	9.87163	0.252897	0.710054	9.18134	3.06343	16.881	20.1926
2021-05-16	5-033	N5	0.5238	0.2131	0.0325	0.0147	1.2	2574	2392	4991	0.00175856	3.41966e-07	10.7349	12.4927	0.106033	0.859295	10.2416	3.70122	23.2276	22.8435
2021-05-16	5-035	N5	0.6767	0.2639	0.0356	0.0147	1.1	2620	2206	4967	0.00178613	7.45247e-07	13.1293	14.5748	0.0775646	0.900822	10.7906	3.91922	27.7041	24.6709
2021-05-16	5-036	N5	0.6151	0.2586	0.0589	0.0219	2	2538	2404	4983	0.000548587	2.63367e-07	13.0377	12.6049	0.0368819	1.03433	9.84976	4.06692	25.6426	22.3377
2021-05-16	5-037	N5	0.4332	0.1868	0.0258	0.0105	1.2	2565	2403	4979	0.0012543	1.48187e-07	8.60454	9.85779	0.0877719	0.872867	8.58844	3.36299	18.4623	19.2529
2021-05-16	5-038	N5	0.569	0.2548	0.0446	0.0189	1.5	2516	2398	4988	0.000741847	1.13043e-07	9.69442	10.1248	0.072211	0.957493	9.34276	3.4914	19.8192	20.6831
2021-05-16	5-039	N5	0.6442	0.2753	0.0464	0.0201	1.6	2545	2422	4992	0.00242573	5.14115e-07	13.4195	11.0007	0.138998	1.21987	9.81163	3.97021	24.4202	22.241
2021-05-16	5-040	N5	0.4883	0.2062	0.0403	0.0181	1.6	2403	2349	4986	0.000574372	1.00386e-07	10.7934	10.7991	0.0425581	0.999474	8.74873	3.55402	21.5926	19.9939
2021-05-16	5-041	N5	0.5174	0.2194	0.0399	0.0144	1.4	2470	2493	4968	0.00201501	6.52411e-07	10.7978	12.5446	0.119368	0.860756	9.33678	3.63656	23.3424	21.0504
2021-05-16	5-042	N5	0.6264	0.2585	0.0417	0.0171	1.6	2558	2395	4986	0.00112616	7.05595e-07	13.2719	13.3684	0.0831203	0.992781	10.623	3.99706	26.6402	23.443
2021-05-16	5-043	N5	0.7222	0.2976	0.0467	0.0205	1.6	2561	2390	4990	0.00118233	4.05139e-07	14.8742	14.8653	0.0761359	1.0006	11.258	4.10198	29.7395	24.9209
2021-05-16	5-044	N5	0.5446	0.2257	0.0244	0.0115	0.8	2571	2328	4972	0.00297281	1.96667e-06	9.64357	12.6142	0.153068	0.764502	9.34747	3.59296	22.2578	21.5018
2021-05-16	5-045	N5	0.4952	0.2095	0.0256	0.0098	1	2500	2416	4987	0.00215529	8.66757e-07	8.9187	11.0739	0.179405	0.805377	8.84931	3.61762	19.9926	20.0794
2021-05-16	5-046	N5	0.6158	0.2663	0.0431	0.0182	1.3	2683	2267	4981	0.00341381	1.88436e-06	13.7685	10.3656	0.169871	1.32828	9.49779	3.89564	24.1341	21.6611
2021-05-16	5-047	N5	0.5181	0.2156	0.0285	0.0113	1	2693	2294	4990	0.000861531	2.08329e-07	10.0757	10.1175	0.0764474	0.995876	8.72522	3.39023	20.1932	20.0301
2021-05-16	5-048	N5	0.6094	0.2525	0.028	0.0125	0.9	2551	2251	4985	0.00149412	5.95914e-07	11.0965	12.5848	0.0705446	0.881742	9.41358	3.63269	23.6813	21.8445
2021-05-16	5-049	N5	0.4159	0.1701	0.0206	0.014	1	2570	2405	4986	0.00215027	9.77872e-07	10.5023	8.3776	0.151911	1.25362	8.92253	3.26364	18.8799	19.975
2021-05-16	5-050	N5	0.3589	0.1537	0.0232	0.0061	1.2	2486	2467	4993	0.00290737	1.35855e-06	9.17891	6.27339	0.218454	1.46315	8.54205	2.98008	15.4523	18.6484
2021-05-16	5-051	N5	0.4038	0.1776	0.0241	0.0081	1	2482	2344	4968	0.00386829	1.87603e-06	10.1608	6.29802	0.287694	1.61333	8.7682	3.13937	16.4588	19.4466
2021-05-16	5-052	N5	0.3081	0.1242	0.0213	0.0045	1.1	2515	2350	4947	0.000575215	1.99693e-07	7.5285	7.97972	0.0571033	0.943453	7.83845	3.00303	15.5082	17.9028
2021-05-16	5-053	N5	0.3214	0.1364	0.0193	0.0063	1	2462	2382	4979	0.00185236	1.3003e-06	8.18636	6.37957	0.146973	1.28322	7.85941	2.86237	14.5659	17.5054
2021-05-16	5-055	N5	0.247	0.1104	0.0199	0.0073	1.2	2169	2091	4320	0.0013321	3.69674e-07	5.14192	6.46359	0.136416	0.795521	6.20136	2.71592	11.6055	14.5636
2021-05-16	5-056	N5	0.6573	0.2714	0.0478	0.0169	1.5	2543	2444	4993	0.000338667	4.1068e-08	11.9028	12.1492	0.027887	0.979716	9.53397	3.94672	24.0519	21.4909
2021-05-16	5-058	N5	0.4839	0.196	0.0299	0.0095	1	2472	2335	4977	0.00207207	9.98982e-07	10.5395	8.47938	0.112597	1.24296	8.25376	3.35125	19.0189	18.7949
2021-05-16	5-059	N5	0.3395	0.1277	0.0231	0.0104	1.2	2421	2281	4995	0.000534183	1.15277e-07	7.68306	7.90304	0.0687178	0.972166	8.30555	3.04503	15.5861	18.3866
2021-05-16	5-060	N5	0.4565	0.1831	0.0262	0.0103	1.1	2603	2379	4986	0.00324039	1.38113e-06	10.9425	7.70212	0.224568	1.42071	8.82057	3.33842	18.6446	19.6575
2021-05-16	5-061	N5	0.6103	0.2308	0.0337	0.0086	1.2	2564	2340	4991	0.000740118	1.14381e-07	13.109	13.5456	0.0512791	0.967768	10.5273	3.92109	26.6546	23.806
2021-05-16	5-062	N5	0.5696	0.2328	0.0421	0.0164	1.4	2544	2390	4984	0.000511378	2.89241e-07	10.2603	9.92736	0.0519865	1.03354	8.8955	3.24866	20.1877	19.945
2021-05-16	5-063	N5	0.7423	0.3162	0.0554	0.0219	1.7	2484	2335	4986	0.00333039	2.89407e-06	15.8177	12.6005	0.145419	1.25532	10.7847	4.12028	28.4182	24.1248
2021-05-16	5-064	N5	0.5582	0.214	0.0303	0.0122	1	2538	2389	4978	0.00111001	3.78416e-07	11.7498	12.8563	0.0579737	0.913931	10.1421	3.84187	24.606	22.9558
2021-05-16	5-065	N5	0.5306	0.2198	0.0353	0.0133	1.4	2415	2529	4986	0.00163672	4.41437e-07	10.0808	11.7166	0.0964486	0.860385	9.46977	3.56412	21.7974	20.9837
2021-05-16	5-066	N5	0.538	0.2117	0.033	0.0106	1.1	2385	2362	4979	0.000882731	4.42306e-07	11.8851	11.3536	0.0870343	1.04681	9.70144	3.59906	23.2388	21.5393
2021-05-16	5-067	N5	0.6626	0.2804	0.054	0.022	1.8	2549	2417	4992	0.00223602	8.47875e-07	13.7306	11.4952	0.105652	1.19447	10.3214	3.93457	25.2258	22.8035
2021-05-16	5-068	N5	0.3374	0.1413	0.0265	0.0111	1.4	2389	2351	4899	0.000608236	1.01267e-07	6.86424	6.93175	0.0568291	0.990262	7.659	2.82042	13.796	16.9053
2021-05-16	5-069	N5	0.4671	0.1941	0.0321	0.0115	1.3	2520	2451	4991	0.000858742	1.05236e-07	10.2883	9.43005	0.0551055	1.09101	8.96727	3.38035	19.7183	19.8549
2021-05-16	5-070	N5	0.5748	0.2448	0.0442	0.0179	1.6	2471	2507	4981	0.00126267	5.26908e-07	9.8712	11.1339	0.0901544	0.886592	9.32482	3.61738	21.0051	20.7045
2021-05-16	5-071	N5	0.366	0.1482	0.0262	0.0093	1.3	2450	2361	4991	0.000925812	2.54232e-07	8.13467	7.53913	0.0929989	1.07899	8.66791	2.9266	15.6738	18.8639
2021-05-16	5-072	N5	0.4375	0.1815	0.0392	0.0149	1.7	2474	2472	4983	0.00226473	4.5689e-07	8.50317	10.7309	0.158574	0.792397	9.24879	3.14086	19.2341	20.3045
2021-05-16	5-073	N5	0.4207	0.1638	0.029	0.0103	1.3	2537	2370	4978	0.00258472	1.00795e-06	10.9595	8.38033	0.147977	1.30777	8.93192	3.43149	19.3398	19.9952
2021-05-16	5-074	N5	0.7299	0.2966	0.0481	0.0174	1.4	2508	2382	4976	0.000895166	4.71062e-07	14.5566	14.5887	0.0790731	0.9978	10.8932	4.34169	29.1454	24.4376
2021-05-16	5-075	N5	0.4084	0.1534	0.0293	0.0103	1.3	2468	2348	4988	0.00151198	5.1168e-07	8.36195	9.84105	0.0959318	0.849701	8.59606	3.26064	18.203	19.2559
2021-05-16	5-076	N5	0.5318	0.218	0.0315	0.0115	1.2	2494	2433	4982	0.000834053	3.93055e-07	11.88	11.153	0.0591792	1.06519	9.75804	3.69777	23.033	21.6288
2021-05-16	5-077	N5	0.777	0.3182	0.0519	0.0191	1.5	2579	2390	4980	0.00150046	6.17356e-07	14.976	15.6439	0.0908757	0.957309	11.3057	4.27956	30.6199	25.1938
2021-05-16	5-078	N5	0.7479	0.3068	0.0513	0.0191	1.6	2520	2422	4992	0.00163697	7.04917e-07	15.0846	14.875	0.0997004	1.01409	11.0916	4.21343	29.9596	24.716
2021-05-16	5-079	N5	0.5172	0.2182	0.0377	0.0147	1.5	2491	2354	4993	0.00533446	3.28269e-06	13.1008	7.76649	0.316142	1.68684	10.0803	3.38406	20.8673	21.8476
2021-05-16	5-080	N5	0.8152	0.3504	0.054	0.0218	1.6	2500	2479	4989	0.00274254	2.05729e-06	13.3723	15.9744	0.159002	0.83711	10.0633	4.42838	29.3468	23.0468
2021-05-16	5-081	N5	0.668	0.2815	0.0415	0.0134	1.3	2373	2494	4983	0.00272453	2.15012e-06	13.524	16.0126	0.165154	0.844584	10.0666	4.44011	29.5367	23.0957
2021-05-16	5-082	N5	0.425	0.162	0.0265	0.0097	1.1	2566	2376	4997	0.000739472	2.56225e-07	9.80052	9.84921	0.0941564	0.995057	9.23441	3.44337	19.6497	20.6531
2021-05-16	5-083	N5	0.2287	0.0897	0.0144	0.0062	1	2445	2264	4851	0.00148219	3.35437e-07	4.51121	5.99179	0.179677	0.7529	7.53974	2.42235	10.503	16.3125
2021-05-16	5-084	N5	0.5205	0.182	0.0404	0.0094	1.4	2587	2398	4995	0.00204675	7.39661e-07	11.2912	13.3379	0.12414	0.846553	9.98127	3.75256	24.6291	22.5035
2021-05-16	5-085	N5	0.8997	0.3698	0.0579	0.0232	1.6	2513	2457	4990	0.00412095	1.95893e-06	19.8044	15.6998	0.141705	1.26144	12.2968	4.47401	35.5042	27.29
2021-05-16	5-086	N5	0.7998	0.3445	0.0558	0.0212	1.6	2541	2320	4985	0.0005915	3.26718e-07	15.1094	14.7125	0.0275098	1.02697	10.848	4.25483	29.8219	24.4482
2021-05-16	5-087	N5	0.7609	0.329	0.0526	0.02	1.7	2567	2367	4980	0.00176322	1.22676e-06	13.1161	14.822	0.0970885	0.884908	10.9911	3.97114	27.9381	24.2313
2021-05-16	5-088	N5	0.3561	0.1402	0.0317	0.0114	1.5	2545	2403	4989	0.00103248	2.83466e-07	8.06074	8.7681	0.0873426	0.919326	8.20029	3.23254	16.8288	18.2686
2021-05-16	5-089	N5	0.5606	0.2165	0.0365	0.012	1.3	2575	2407	4991	0.00247755	1.20105e-06	11.1663	13.6197	0.124903	0.819861	10.432	3.85631	24.7859	23.1362
2021-05-16	5-091	N5	0.5622	0.2121	0.0345	0.0106	1.2	2632	2351	4995	0.000594604	2.38598e-07	13.0185	12.7398	0.0480573	1.02187	10.426	4.01234	25.7583	23.3971
2021-05-16	5-092	N5	0.736	0.3182	0.0511	0.0203	1.5	2619	2339	4976	0.000489483	6.53071e-08	13.8961	13.4588	0.0355834	1.03249	9.71015	4.24576	27.3549	22.3233
2021-05-16	5-093	N5	0.5221	0.2117	0.041	0.0136	1.6	2527	2439	4982	0.000626261	9.92607e-08	10.9261	11.2823	0.041723	0.96843	9.61825	3.5551	22.2084	21.3402
2021-05-16	5-094	N5	0.4502	0.1873	0.0418	0.0149	1.6	2494	2333	4990	0.000428662	7.34348e-08	8.56227	8.84796	0.0498115	0.967712	7.76391	3.20487	17.4102	17.756
2021-05-16	5-096	N5	0.6691	0.2476	0.0448	0.0131	1.5	2589	2292	4981	0.00124877	6.51465e-07	15.0839	13.9393	0.0530295	1.08212	10.9384	4.09026	29.0233	24.638
2021-05-16	5-097	N5	0.4256	0.1855	0.0337	0.0141	1.4	2512	2319	4987	0.00129367	4.95519e-07	8.52823	7.95752	0.148833	1.07172	9.00915	3.11681	16.4857	19.6506
2021-05-16	5-098	N5	0.418	0.1597	0.0338	0.0127	1.5	2447	2299	4965	0.00113835	6.75883e-08	9.06036	10.1986	0.0898964	0.888394	8.91682	3.23925	19.2589	19.6373
2021-05-16	5-099	N5	0.7539	0.3218	0.047	0.0183	1.5	2545	2323	4982	0.00160159	5.66863e-07	15.273	13.9046	0.0708101	1.09841	11.0511	3.99406	29.1776	24.4815
2021-05-16	5-100	N5	0.6137	0.267	0.0492	0.0197	1.8	2593	2385	4985	0.00218421	1.81171e-06	10.9789	13.082	0.135144	0.839239	9.95537	3.77829	24.0609	22.1751
2021-05-16	5-101	N5	0.5026	0.2048	0.0237	0.0089	1	2642	2329	4985	0.00115022	1.42591e-07	11.4358	10.2857	0.089079	1.11181	9.64762	3.5273	21.7215	21.6928
2021-05-16	5-103	N5	0.5982	0.2564	0.049	0.0183	1.7	2507	2432	4966	0.00165799	3.17809e-07	11.1729	12.83	0.0997843	0.870843	10.0604	3.64688	24.003	22.2112
2021-05-16	5-104	N5	0.6348	0.2731	0.0437	0.0166	1.5	2548	2393	4993	0.00304166	1.68898e-06	10.6127	13.5706	0.174649	0.782036	10.2219	3.65264	24.1834	22.5152
2021-05-16	5-105	N5	0.7689	0.3312	0.0522	0.0201	1.7	2569	2388	4986	0.000915666	2.05187e-07	14.291	13.8681	0.0672566	1.0305	10.8924	4.027	28.1592	24.2711
2021-05-16	5-106	N5	0.6718	0.2768	0.0377	0.0138	1.2	2538	2416	4991	0.000798553	3.64434e-07	13.545	14.1469	0.0328759	0.957453	10.8303	3.94598	27.692	24.4547
2021-05-16	5-107	N5	0.5847	0.2591	0.0424	0.0165	1.6	2494	2429	4994	0.00132796	6.32119e-07	10.8041	12.1089	0.0683597	0.892249	9.99822	3.64726	22.913	21.9751
2021-05-16	5-108	N5	0.7439	0.3255	0.0424	0.0168	1.3	2607	2319	4996	0.00137926	9.44392e-07	15.2681	13.9495	0.0765204	1.09452	11.4226	4.09595	29.2176	25.2526
2021-05-16	5-109	N5	0.6575	0.259	0.0471	0.0157	1.5	2533	2457	5000	0.000695946	1.20081e-07	13.7723	13.1923	0.050733	1.04396	10.7307	3.7935	26.9647	23.7352
2021-05-16	5-110	N5	0.7178	0.32	0.0659	0.0256	2.2	2555	2392	4989	0.000469565	1.09455e-07	15.5381	15.4572	0.0253942	1.00523	11.0392	4.11381	30.9953	24.4492
2021-05-16	5-111	N5	0.4194	0.1642	0.0291	0.0075	1.3	2590	2302	4994	0.000322484	1.43564e-07	9.39759	9.59029	0.0525669	0.979907	9.23394	3.36999	18.9879	20.2778
2021-05-16	5-112	N5	0.8052	0.3703	0.0712	0.0298	2.1	2481	2468	4995	0.00201813	3.95776e-07	15.1186	17.1367	0.133889	0.882233	11.5067	4.3553	32.2553	25.4813
2021-05-16	5-113	N5	0.8223	0.3714	0.0692	0.0272	2.2	2489	2332	4986	0.00216846	2.48117e-06	14.9499	17.0411	0.0733637	0.877287	11.1624	4.24569	31.991	24.9845
2021-05-16	5-114	N5	0.6645	0.263	0.0386	0.0139	1.3	2538	2411	4991	0.00336418	2.61895e-06	12.2442	15.5979	0.135162	0.784988	10.6858	4.11736	27.8421	24.2358
2021-05-16	5-115	N5	0.4578	0.1893	0.0295	0.0109	1.1	2612	2363	4990	0.000371586	5.3795e-08	9.24352	9.06168	0.0296622	1.02007	9.18593	3.26068	18.3052	20.3511
2021-05-16	5-116	N5	0.5325	0.2116	0.0491	0.0173	1.7	2544	2361	4996	0.000551988	1.36602e-07	11.5503	11.2786	0.0375754	1.02409	9.66846	3.50357	22.829	21.8241
2021-05-16	5-117	N5	0.6492	0.2675	0.0382	0.0141	1.2	2601	2240	4986	0.00220874	5.55823e-07	14.1415	11.9328	0.123588	1.1851	10.4587	3.99075	26.0742	23.6254
2021-05-16	5-118	N5	0.6905	0.277	0.0502	0.0177	1.6	2665	2315	4998	0.0023771	7.94773e-07	15.4631	13.1075	0.0944529	1.17971	10.7487	4.10787	28.5706	24.5414
2021-05-16	5-119	N5	0.5337	0.2163	0.0352	0.0135	1.3	2573	2318	4986	0.000577882	1.30816e-07	10.8396	11.3295	0.0558036	0.956758	9.63201	3.72764	22.1692	21.7865
2021-05-16	5-120	N5	0.5797	0.2285	0.0389	0.0135	1.4	2577	2358	4994	0.00146372	3.55938e-07	12.4985	12.198	0.0978933	1.02463	10.0311	3.9496	24.6965	22.4052
2021-05-16	5-121	N5	0.7907	0.333	0.0692	0.0247	2.1	2498	2408	4981	0.00464328	3.54711e-06	11.2671	15.899	0.196779	0.708671	10.7591	3.84464	27.1661	23.7344
2021-05-16	5-122	N5	0.3787	0.1574	0.0292	0.007	1.2	2583	2339	4989	0.00188313	2.18148e-07	7.05421	8.93734	0.207786	0.789297	9.11005	3.1085	15.9916	19.8981
2021-05-16	5-123	N5	0.6736	0.2738	0.0419	0.0157	1.4	2622	2312	4990	0.00214594	1.30535e-06	11.9072	14.0114	0.111712	0.849823	10.7697	3.66479	25.9187	23.8433
2021-05-16	5-124	N5	0.575	0.2238	0.0445	0.0147	1.5	2521	2414	4990	0.000549371	1.68259e-07	12.5997	12.2126	0.0340823	1.0317	9.51234	3.80556	24.8123	21.9878
2021-05-16	5-125	N5	0.5539	0.2106	0.0378	0.0135	1.5	2533	2447	4987	0.00044758	6.97593e-08	12.1952	12.2414	0.0379156	0.996229	10.1652	3.86554	24.4366	22.4873
2021-05-16	5-126	N5	0.5674	0.2438	0.0454	0.0167	1.6	2564	2366	4978	0.00102034	9.51516e-07	9.42	10.0792	0.0670067	0.934599	9.98185	3.09358	19.4992	21.5575
2021-05-16	5-127	N5	0.5916	0.238	0.0364	0.0134	1	2463	2491	4991	0.000729592	2.16214e-07	12.1104	12.3318	0.060647	0.982052	9.9522	3.80671	24.4422	22.4674
2021-05-16	5-128	N5	0.6534	0.2567	0.0394	0.0144	1.3	2498	2413	4985	0.000672122	1.25839e-07	13.4885	13.4809	0.0536377	1.00056	10.3085	4.1318	26.9694	23.1343
2021-05-16	5-129	N5	0.5512	0.2252	0.0525	0.0183	2.1	2568	2385	4982	0.0031145	8.3351e-07	13.1982	10.0837	0.175715	1.30887	9.95015	3.61108	23.2818	21.931
2021-05-16	5-130	N5	0.452	0.1906	0.041	0.0153	1.7	2574	2364	4994	0.00272438	1.30477e-06	8.00427	10.6713	0.217708	0.750073	9.55043	3.38722	18.6756	20.8866
2021-05-16	5-131	N5	0.4619	0.2001	0.0353	0.0143	1.6	2602	2334	4994	0.000759704	1.66504e-07	9.72425	9.08732	0.0592478	1.07009	9.15136	3.32114	18.8116	20.1338
2021-05-16	5-132	N5	0.4941	0.2055	0.0332	0.0136	1.5	2577	2397	4990	0.000487865	9.37316e-08	9.91418	9.98359	0.0486256	0.993047	9.11998	3.36239	19.8978	20.2277
2021-05-16	5-133	N5	0.632	0.2549	0.0676	0.0234	2.5	2542	2337	4971	0.00172792	1.37172e-06	13.0922	14.1807	0.0930314	0.923243	10.9076	3.76662	27.2729	23.8886
2021-05-16	5-134	N5	0.4693	0.195	0.0326	0.0091	1.5	2503	2283	4991	0.000742533	4.21252e-07	9.574	9.95877	0.063631	0.961364	9.14115	3.43736	19.5328	20.2331
2021-05-16	5-135	N5	0.5997	0.2592	0.0472	0.0183	1.8	2540	2318	4986	0.000897924	2.98697e-07	12.6928	11.8662	0.0591512	1.06965	10.2338	3.83242	24.559	22.6627
2021-05-16	5-136	N5	0.6814	0.2844	0.058	0.0203	2.1	2569	2389	4971	0.00197383	9.16827e-07	13.0741	15.0467	0.0998511	0.8689	11.0301	3.8534	28.1207	24.3416
2021-05-16	5-137	N5	0.4739	0.1726	0.0359	0.0111	1.5	2550	2408	4982	0.000229672	4.7926e-08	10.1928	10.1621	0.0203473	1.00303	9.31461	3.27259	20.3549	20.7788
2021-05-16	5-138	N5	0.5052	0.2002	0.0325	0.0111	1.3	2555	2370	5001	0.00196573	7.08204e-07	9.85335	11.819	0.113138	0.833687	9.91444	3.58251	21.6724	21.8317
2021-05-16	5-139	N5	0.6449	0.2504	0.0423	0.0123	1.4	2509	2461	4979	0.00121302	3.86035e-07	13.2179	14.4309	0.0823853	0.915943	10.5095	3.97927	27.6488	23.4556
2021-05-16	5-140	N5	0.5198	0.2179	0.0312	0.0121	1.1	2562	2422	4990	0.0011434	2.12188e-07	11.5314	10.388	0.076763	1.11007	9.64159	3.7668	21.9194	21.6187
2021-05-16	5-141	N5	0.6631	0.2785	0.042	0.0174	1.4	2589	2274	4993	0.00172825	1.94627e-06	12.4249	13.9804	0.0942195	0.888739	10.608	3.70607	26.4053	23.888
2021-05-16	5-142	N5	0.5875	0.249	0.0496	0.0203	1.9	2516	2359	4982	0.000435153	1.44418e-07	11.9987	11.7717	0.0367455	1.01928	9.84159	3.65285	23.7704	22.1882
2021-05-16	5-143	N5	0.2937	0.1281	0.0226	0.0077	1.1	2597	2334	4986	0.00220541	6.31388e-07	7.55111	5.34576	0.215923	1.41254	7.8146	2.80253	12.8969	17.2998
2021-05-16	5-146	N5	0.7551	0.3298	0.0416	0.0183	1.4	2571	2388	4986	0.00206826	1.76105e-06	10.4148	12.4692	0.0894092	0.835243	10.2668	3.58108	22.8839	22.553
2021-05-16	5-148	N5	0.8517	0.3753	0.0462	0.0191	1.3	2597	2386	4980	0.0010043	4.05154e-07	16.4418	16.6022	0.066369	0.990336	11.4913	4.41641	33.044	25.6851
2021-05-16	5-149	N5	0.8011	0.3546	0.0483	0.0182	1.5	2590	2308	4974	0.000784749	4.35151e-07	14.9558	14.3713	0.0477485	1.04067	10.8148	4.19478	29.3271	24.4835
2021-05-16	5-150	N5	0.6825	0.3076	0.0485	0.0189	1.8	2646	2318	4977	0.00315322	2.21961e-06	13.8721	10.7309	0.140987	1.29273	10.2991	3.82152	24.603	22.7574
2021-05-16	5-151	N5	0.6604	0.2894	0.0487	0.0193	1.7	2581	2380	4995	0.000783646	3.47173e-07	11.8235	12.1691	0.0474031	0.9716	10.5301	3.64698	23.9927	23.135
2021-05-16	5-152	N5	0.4885	0.2238	0.0333	0.0143	1.6	2591	2319	4973	0.00202993	3.79576e-07	10.091	8.06117	0.141266	1.2518	8.60605	3.213	18.1521	19.145
2021-05-16	5-153	N5	0.3824	0.164	0.0334	0.0134	1.6	2585	2322	4983	0.00102476	1.38502e-07	8.1291	7.10437	0.0848015	1.14424	8.08406	2.96422	15.2335	17.8905
2021-05-16	5-155	N5	0.5188	0.2407	0.0353	0.0161	1.6	2482	2327	4977	0.00302193	6.60687e-07	8.07132	11.0931	0.239373	0.7276	9.06009	3.46369	19.1644	20.1167
2021-05-16	5-156	N5	0.4572	0.2105	0.0285	0.0123	1.5	2424	2285	4976	0.00103596	1.99232e-07	8.24531	9.18351	0.0820348	0.897838	8.54591	3.00936	17.4288	18.9101
2021-05-16	5-157	N5	0.5873	0.2719	0.0368	0.0161	1.6	2416	2313	4985	0.000833021	1.81563e-07	11.1565	10.3825	0.0534707	1.07455	9.44203	3.52766	21.5389	20.8852
2021-05-16	5-158	N5	0.6206	0.2728	0.0503	0.0195	1.9	2485	2328	4981	0.000680452	1.22213e-07	11.6051	11.968	0.0440693	0.969676	10.1481	3.62927	23.573	22.4247
2021-05-16	5-159	N5	0.5468	0.2478	0.0339	0.0137	1.5	2488	2382	4991	0.000480472	1.31963e-07	10.2162	9.96337	0.0444272	1.02538	9.32067	3.2217	20.1796	20.5101
2021-05-16	5-160	N5	0.4656	0.2174	0.0314	0.0144	1.3	2433	2407	4957	0.000468963	1.05414e-07	8.25404	7.98169	0.0564732	1.03412	7.70071	3.17972	16.2357	17.3888
2021-05-16	5-161	N5	0.5401	0.2431	0.0446	0.0192	1.7	2611	2323	4973	0.0035327	1.779e-06	8.38956	11.9065	0.213071	0.70462	9.75795	3.33555	20.2961	21.2968
2021-05-16	5-162	N5	0.7717	0.3385	0.0581	0.0243	1.9	2620	2336	4979	0.000793082	3.7403e-07	14.9011	14.1567	0.045913	1.05259	10.7697	4.10633	29.0578	24.1392
2021-05-16	5-163	N5	0.5578	0.2261	0.0308	0.011	1.1	2562	2424	4992	0.000979108	1.80582e-07	12.1583	11.4715	0.0735584	1.05987	9.4553	3.78155	23.6298	21.4232
2021-05-16	5-166	N5	0.767	0.3195	0.0584	0.0213	1.8	2659	2290	4989	0.00399998	3.35977e-06	17.8321	13.841	0.129233	1.28835	11.4766	4.06607	31.6731	25.8164
2021-05-16	5-167	N5	0.7323	0.3136	0.05	0.0206	1.6	2589	2291	4990	0.00143503	3.74539e-07	16.0486	14.6802	0.0659819	1.09322	11.1829	4.16182	30.7287	25.1421
2021-05-16	5-168	N5	0.5745	0.2757	0.039	0.0176	1.3	2558	2364	4996	0.000903759	4.18505e-07	9.86994	9.0935	0.0815506	1.08538	8.50381	3.38649	18.9634	19.1834
2021-05-16	5-169	N5	0.5326	0.2432	0.0315	0.0134	1.4	2609	2367	4994	0.00123087	9.37202e-07	10.5765	9.44224	0.10503	1.12013	9.1502	3.25471	20.0188	20.3079
2021-05-16	5-170	N5	0.6207	0.2908	0.0375	0.0172	0.9	2559	2370	4978	0.000967011	3.07895e-07	9.65384	10.3673	0.0656488	0.931184	8.86569	3.50009	20.0211	19.754
2021-05-16	5-171	N5	0.6752	0.311	0.0644	0.0294	2.2	2520	2312	4989	0.000693636	2.95101e-07	13.3118	12.6866	0.0514835	1.04929	10.1838	3.68616	25.9984	22.7348
2021-05-16	5-172	N5	0.3493	0.1606	0.0223	0.0083	1.2	2505	2460	4986	0.000780035	2.22262e-07	6.52543	7.29678	0.0674753	0.894289	8.27603	2.7517	13.8222	17.8511
2021-05-16	5-174	N5	0.4745	0.2347	0.0285	0.0139	1.2	2358	2386	4792	0.00150102	3.38115e-07	7.01685	8.51787	0.134369	0.82378	7.49564	3.20667	15.5347	16.9602
2021-05-16	5-175	N5	0.8593	0.3573	0.0565	0.0211	1.7	2620	2308	4975	0.00372833	2.53519e-06	18.1386	14.4128	0.130696	1.2585	11.9724	4.25093	32.5515	27.2162
2021-05-16	5-176	N5	0.4952	0.2101	0.052	0.0206	1.9	2478	2413	4986	0.0015977	7.50458e-07	7.80024	9.3796	0.127009	0.831618	9.14976	3.07599	17.1798	19.8827
2021-05-16	5-177	N5	0.488	0.1922	0.0407	0.0141	1.5	2511	2418	4994	0.000610333	1.27106e-07	9.80416	10.2671	0.0439302	0.954907	8.87754	3.38636	20.0713	20.304
2021-05-16	5-178	N5	0.556	0.2247	0.0401	0.0154	1.6	2460	2446	4994	0.00264686	8.90691e-07	9.32503	11.9719	0.156855	0.778911	9.12032	3.54506	21.2969	20.6095
2021-05-16	5-180	N5	0.6174	0.2492	0.0611	0.0214	2.2	2522	2384	4966	0.000585428	1.37789e-07	11.78	11.2071	0.0380397	1.05112	9.4437	3.58104	22.987	21.1175
2021-05-16	5-181	N5	0.6292	0.2562	0.0365	0.0137	1.3	2499	2444	4968	0.00135283	3.58585e-07	11.4045	12.7573	0.0740743	0.893956	9.5229	3.77918	24.1618	21.6166
2021-05-16	5-182	N5	0.6447	0.2753	0.0505	0.0196	1.9	2472	2418	4990	0.00119505	5.85911e-07	10.8186	12.0124	0.061355	0.900626	9.76071	3.59894	22.831	21.5343
2021-05-16	5-183	N5	0.5192	0.2209	0.0325	0.0131	1.4	2548	2406	4990	0.0013224	6.0987e-07	8.80018	10.1184	0.0893783	0.869723	8.58426	3.49727	18.9186	19.2861
2021-05-16	5-184	N5	0.6174	0.2575	0.0495	0.0193	1.9	2539	2393	4991	0.00132509	3.43594e-07	10.1904	11.5155	0.116723	0.884933	9.62343	3.71591	21.7059	21.3069
2021-05-16	5-185	N5	0.7889	0.329	0.0535	0.0211	1.9	2521	2317	4994	0.00137316	1.25158e-06	13.1386	14.3879	0.0859431	0.913172	10.7547	4.01009	27.5265	23.7097
2021-05-16	5-186	N5	0.6162	0.2588	0.0527	0.0193	2	2551	2381	4993	0.0010989	4.32547e-07	11.5064	12.2835	0.0612168	0.936735	9.93854	3.61426	23.7898	21.9283
2021-05-16	5-187	N5	0.6426	0.2593	0.0461	0.0182	1.7	2546	2383	4982	0.00122256	2.34792e-07	13.4505	12.2408	0.0687316	1.09883	10.3235	3.65575	25.6913	22.8098
2021-05-16	5-188	N5	0.8644	0.3598	0.0516	0.0194	1.5	2650	2336	5003	0.00485391	5.29695e-06	14.6905	19.4787	0.162985	0.754183	12.4046	4.26347	34.1692	27.9902
2021-05-16	5-189	N5	0.6372	0.2589	0.0554	0.0205	2	2464	2435	4993	0.00210595	5.91749e-07	10.8492	12.9552	0.124133	0.837443	9.54338	3.6921	23.8044	21.2919
2021-05-16	5-190	N5	0.5822	0.2428	0.0364	0.0141	1.4	2552	2418	4987	0.00324708	9.18254e-07	9.84285	13.0899	0.208321	0.751941	10.3914	3.57218	22.9328	23.2115
2021-05-16	5-191	N5	0.7753	0.3205	0.0465	0.0183	1.5	2628	2338	4974	0.00190318	9.06005e-07	15.1934	13.4456	0.0927995	1.12999	10.7487	4.26953	28.639	24.4443
2021-05-16	5-192	N5	0.7136	0.2967	0.0505	0.0163	2	2531	2430	4981	0.000816936	4.13709e-07	12.425	13.2266	0.0536056	0.939397	10.5641	3.90776	25.6516	23.3369
2021-05-16	5-193	N5	0.7967	0.3344	0.0645	0.0261	2.2	2513	2402	4982	0.00125756	5.25236e-07	13.6316	14.7821	0.061691	0.922172	10.6249	4.06079	28.4138	23.7395
2021-05-16	5-194	N5	0.696	0.2821	0.0389	0.0138	1.4	2577	2395	4991	0.00388002	1.73826e-06	15.8795	11.9994	0.174856	1.32335	10.5349	4.24912	27.8789	24.0195
2021-05-16	5-195	N5	0.658	0.274	0.0548	0.0201	2.1	2475	2439	4991	0.00135921	9.10615e-07	11.9723	12.4318	0.0743588	0.963036	10.2263	3.64128	24.4041	22.3705
2021-05-16	5-196	N5	0.43	0.1839	0.0374	0.0144	1.9	2565	2394	4994	0.00151114	3.4722e-07	7.16557	8.63248	0.138044	0.830071	8.66309	3.06041	15.798	18.9297
2021-05-16	5-197	N5	0.5431	0.229	0.0395	0.0158	1.7	2483	2376	4993	0.00109765	2.70462e-07	9.78742	10.879	0.0869211	0.899666	9.64192	3.5314	20.6664	21.1095
2021-05-16	5-198	N5	0.6188	0.2547	0.0409	0.0145	1.6	2551	2438	4999	0.00223478	7.67085e-07	11.0874	13.3009	0.110779	0.833587	9.76132	3.70099	24.3883	21.7765
2021-05-16	5-199	N5	0.3708	0.1656	0.0268	0.0124	1.4	2601	2373	4987	0.000680989	2.67864e-07	7.22801	7.66864	0.0550375	0.94254	8.26439	2.98847	14.8967	18.1266
2021-05-16	5-200	N5	0.5568	0.2369	0.0349	0.0132	1.5	2550	2362	4976	0.000638939	1.15411e-07	11.0616	11.0276	0.0539201	1.00308	9.65726	3.68056	22.0892	21.3696
2021-05-16	5-201	N5	0.4909	0.2026	0.0456	0.0171	2	2520	2458	4988	0.000817542	1.38065e-07	9.10371	9.8918	0.0590017	0.920328	8.68931	3.24078	18.9955	19.1499
2021-05-16	5-202	N5	0.6202	0.2597	0.0362	0.0143	1.5	2433	2360	4990	0.0015116	6.13429e-07	11.2697	12.6218	0.0882848	0.892871	10.0691	3.73653	23.8915	22.1412
2021-05-16	5-203	N5	0.7522	0.312	0.0531	0.0207	1.6	2568	2380	4999	0.00136108	7.40978e-07	14.089	15.1911	0.0705322	0.92745	11.8549	3.81805	29.2801	26.4253
2021-05-16	5-204	N5	0.5518	0.2376	0.0299	0.0127	1.4	2531	2445	4981	0.00210342	3.47296e-07	9.79305	11.8965	0.142855	0.823189	9.75107	3.44994	21.6895	21.3403
2021-05-16	5-205	N5	0.5767	0.2024	0.036	0.0137	2.1	2524	2428	4983	0.0025317	1.08925e-06	8.93569	11.4674	0.160265	0.779226	9.38954	3.31745	20.4031	20.6175
2021-05-16	5-206	N5	0.6078	0.2586	0.0491	0.0201	1.9	2574	2397	4993	0.00455508	1.85563e-06	8.71809	13.273	0.283243	0.656829	10.0336	3.57517	21.9911	21.9977
2021-05-16	5-207	N5	0.6667	0.2826	0.0493	0.0195	1.9	2532	2301	4975	0.00118911	6.93241e-07	12.3783	11.5305	0.0857435	1.07353	9.73731	3.92548	23.9088	21.7574
2021-05-16	5-208	N5	0.5922	0.2446	0.0346	0.0136	1.2	2653	2316	4985	0.000625113	1.68075e-07	11.8101	12.088	0.0647589	0.977006	10.2152	3.81244	23.8981	22.8974
2021-05-16	5-209	N5	0.7015	0.2883	0.0507	0.0208	2	2567	2384	4984	0.00076507	2.13675e-07	12.8074	13.2709	0.0491882	0.965068	10.1417	4.02136	26.0783	22.6313
2021-05-16	5-210	N5	0.6241	0.2418	0.0349	0.0147	1.2	2507	2421	4981	0.000859776	1.87467e-07	10.3879	11.2403	0.106781	0.924165	9.6052	3.70088	21.6282	21.6666
2021-05-16	5-211	N5	0.7514	0.336	0.0521	0.0231	1.9	2550	2323	4972	0.00170842	3.39214e-07	14.009	12.3226	0.0831464	1.13685	9.76678	4.0395	26.3316	22.2017
2021-05-16	5-212	N5	0.4936	0.2048	0.0279	0.0109	1.2	2607	2360	4988	0.000427294	6.52018e-08	9.70664	9.87306	0.0372521	0.983144	8.911	3.56014	19.5797	19.9473
2021-05-16	5-213	N5	0.6555	0.2871	0.0458	0.0191	1.8	2565	2375	4983	0.000704614	3.76703e-07	12.0007	11.4626	0.0374828	1.04694	9.74424	3.67745	23.4632	21.5577
2021-05-16	5-215	N5	0.627	0.2613	0.045	0.0172	1.9	2502	2439	5005	0.00179543	1.18573e-06	10.5869	12.3801	0.0996914	0.855157	9.90872	3.59348	22.967	21.9199
2021-05-16	5-216	N5	0.4669	0.2043	0.0348	0.0148	1.7	2563	2419	4994	0.00132803	2.28502e-07	8.18861	9.51655	0.114296	0.86046	9.01874	3.21283	17.7052	19.7022
2021-05-16	5-217	N5	0.3997	0.1563	0.0311	0.0105	1.5	2561	2328	4995	0.000614982	1.36445e-07	8.28072	7.71093	0.044958	1.07389	7.94705	2.99333	15.9916	17.821
2021-05-16	5-218	N5	0.4276	0.1677	0.0247	0.0091	1.1	2538	2392	4982	0.000367913	8.30684e-08	8.89421	8.58704	0.038848	1.03577	8.54306	3.30588	17.4812	19.0073
2021-05-16	5-219	N5	0.397	0.2142	0.0306	0.0085	1.5	2526	2296	4993	0.0021	9.12454e-07	9.11008	11.1978	0.121817	0.813563	9.0297	3.6282	20.3078	20.2479
2021-05-16	5-220	N5	0.5074	0.1711	0.0228	0.0111	1	2582	2344	4983	0.00220427	2.14493e-06	10.1838	8.06818	0.137217	1.26222	8.62492	3.41396	18.252	19.3405
2021-05-16	5-221	N5	0.4237	0.2275	0.0297	0.0126	1.2	2613	2361	4992	0.00162423	3.84754e-07	11.5289	9.90471	0.112248	1.16399	9.42605	3.48038	21.4337	20.8057
2021-05-16	5-222	N5	0.5535	0.2436	0.0352	0.0144	1.4	2595	2321	4985	0.00340484	3.13759e-06	13.2138	9.93976	0.155255	1.32939	9.79224	3.74142	23.1536	22.1984
2021-05-16	5-224	N5	0.4559	0.1711	0.0298	0.0085	1.3	2557	2416	4977	0.00106908	2.68183e-07	9.71288	8.64842	0.0631219	1.12308	8.66847	3.13512	18.3613	19.2074
2021-05-16	5-225	N5	0.4682	0.2194	0.0265	0.0139	1.1	2426	2372	4987	0.000603806	1.39247e-07	10.971	11.1102	0.0758875	0.987473	9.35389	3.74281	22.0812	20.9298
2021-05-16	5-226	N5	0.5454	0.2805	0.0358	0.0186	1.6	2520	2435	4983	0.00491263	3.95962e-06	11.3329	16.2451	0.20707	0.697616	10.6798	3.82383	27.578	23.7183
2021-05-16	5-227	N5	0.8205	0.3118	0.065	0.0207	1.6	2449	2397	4989	0.00329411	3.27969e-06	11.4799	14.7708	0.129049	0.777199	10.1715	3.78674	26.2507	22.7893
2021-05-16	5-228	N5	0.6425	0.2592	0.0502	0.0186	1.6	2567	2375	4987	0.000856665	2.01012e-07	11.7067	12.3354	0.0582075	0.94904	9.93201	3.63198	24.0421	22.1446
2021-05-16	5-229	N5	0.5166	0.2085	0.0266	0.0101	1.1	2534	2383	4988	0.00159582	6.05596e-07	10.6724	9.25273	0.0954317	1.15344	9.11852	3.58165	19.9252	20.3163
2021-05-16	5-230	N5	0.6538	0.2592	0.0277	0.0098	1	2568	2404	4992	0.00119255	6.36327e-07	11.4039	12.5625	0.0641399	0.907776	10.1738	3.58927	23.9663	22.4767
2021-05-16	5-231	N5	0.4573	0.1991	0.0321	0.014	1.3	2518	2347	4986	0.000964712	1.86595e-07	9.60364	8.64222	0.0732464	1.11125	8.52134	3.19422	18.2459	19.0397
2021-05-16	5-232	N5	0.5226	0.2152	0.0204	0.0127	1.4	2498	2408	4987	0.00138104	5.84035e-07	11.4024	10.0351	0.0662655	1.13625	9.26967	3.56593	21.4374	20.647
2021-05-16	5-233	N5	0.3896	0.1629	0.0258	0.0101	1.4	2434	2356	4989	0.000851485	3.44467e-07	8.56417	7.71987	0.0544672	1.10937	8.11453	2.92534	16.284	18.0367
2021-05-16	5-234	N5	0.3858	0.1575	0.029	0.0108	1.5	2467	2314	4993	0.00166918	4.3082e-07	7.06503	8.72193	0.141978	0.81003	8.7696	2.99708	15.787	19.0767
2021-05-16	5-235	N5	0.622	0.2761	0.0458	0.0184	1.3	2577	2341	4980	0.00236042	1.53101e-06	11.1381	13.4224	0.114606	0.829812	10.3073	3.72066	24.5606	23.0284
2021-05-16	5-236	N5	0.6285	0.2605	0.0466	0.0202	1.7	2575	2395	4988	0.00167814	1.23765e-06	11.7902	10.1261	0.0710058	1.16434	9.63337	3.53969	21.9163	21.3023
2021-05-16	5-237	N5	0.681	0.2584	0.0488	0.0131	1.2	2510	2461	4992	0.000815877	4.49645e-07	12.7301	13.3823	0.0749581	0.951262	10.5751	3.75082	26.1124	23.585
2021-05-16	5-238	N5	0.6116	0.2429	0.0351	0.0134	1.3	2577	2403	4993	0.00232269	9.09516e-07	14.1368	11.8141	0.112824	1.1966	9.95233	3.97585	25.9508	22.5741
2021-05-16	5-239	N5	0.5972	0.241	0.04	0.0147	1.6	2521	2463	4994	0.00137042	3.96472e-07	11.5595	12.7827	0.0874473	0.904307	9.796	3.93268	24.3422	21.9104
2021-05-16	5-240	N5	0.5217	0.2364	0.036	0.0152	1.2	2581	2300	4990	0.00197695	5.06918e-07	9.20538	11.1604	0.13367	0.824826	9.72824	3.29363	20.3658	21.5564
2021-05-16	5-241	N5	0.8334	0.3345	0.0557	0.0181	1.4	2428	2427	4988	0.00544909	8.0683e-06	14.2169	19.5672	0.188255	0.726571	12.3066	4.5303	33.7841	27.3021
2021-05-16	5-242	N5	0.4994	0.2062	0.0286	0.0113	1.3	2439	2337	4991	0.00122929	4.35191e-07	10.5061	11.718	0.0771866	0.896574	9.33326	3.64408	22.2241	20.815
2021-05-16	5-243	N5	0.5261	0.2165	0.0332	0.0127	1.5	2529	2352	4985	0.00266486	1.03133e-06	9.43783	12.0666	0.154716	0.782144	9.6659	3.34057	21.5044	21.3027
2021-05-16	5-245	N5	0.4035	0.1681	0.0211	0.0075	1	2456	2256	4974	0.00231226	4.42309e-07	7.3931	9.69794	0.193301	0.762338	8.36666	3.32341	17.091	18.6142
2021-05-16	5-246	N5	0.5059	0.2138	0.0379	0.0135	1.6	2513	2423	4990	0.00113697	6.51881e-07	11.1314	9.99683	0.0621975	1.11349	9.37142	3.54503	21.1282	21.0051
2021-05-16	5-247	N5	0.6545	0.2952	0.0439	0.0183	1.2	2489	2474	4999	0.00235575	6.64145e-07	14.1359	11.8426	0.131896	1.19364	10.3864	3.89532	25.9785	23.4986
2021-05-16	5-248	N5	0.8246	0.3787	0.0527	0.025	1.4	2518	2449	4983	0.00401022	2.26136e-06	10.9441	14.9461	0.181373	0.732238	10.3544	3.78188	25.8902	22.9639
2021-05-16	5-249	N5	0.4784	0.2081	0.0391	0.0162	1.6	2582	2400	4990	0.000641093	2.16398e-07	9.44411	9.0057	0.0446573	1.04868	9.10269	3.3198	18.4498	20.2472
2021-05-16	5-250	N5	0.4442	0.1867	0.0234	0.0141	1	2528	2420	4981	0.000999671	3.55094e-07	9.66592	8.76281	0.0719363	1.10306	8.87049	3.37433	18.4287	19.7908
2021-05-16	5-251	N5	0.5974	0.2668	0.0364	0.0152	1.1	2609	2321	4990	0.00230866	9.84744e-07	10.9653	13.1953	0.138546	0.831004	9.98528	3.67971	24.1606	22.4925
2021-05-16	5-252	N5	0.8239	0.3321	0.0652	0.0216	1.7	2477	2442	4998	0.00206857	9.92701e-07	18.2316	16.2501	0.0714983	1.12194	11.9972	4.46423	34.4817	27.2304
2021-05-16	5-253	N5	0.4346	0.1775	0.0268	0.0096	1.3	2565	2370	4983	0.000574313	1.52591e-07	9.48361	10.0527	0.0663833	0.943387	8.31872	3.50311	19.5363	19.1677
2021-05-16	5-254	N5	0.548	0.2659	0.0334	0.0177	1.2	2579	2388	4997	0.000935108	2.26455e-07	9.29865	9.8595	0.09131	0.943115	9.54502	3.20065	19.1581	20.7086
2021-05-16	5-255	N5	0.3925	0.1598	0.0248	0.0105	1.3	2545	2426	4982	0.00256787	3.30618e-07	7.31314	9.88101	0.218966	0.74012	8.58901	3.11755	17.1941	18.9986
2021-05-16	5-256	N5	0.5488	0.2311	0.0313	0.0163	1.4	2421	2387	4972	0.00233182	1.00263e-06	9.87601	12.2078	0.155807	0.808993	9.1859	3.81755	22.0838	20.5953
2021-05-16	5-257	N5	0.594	0.2564	0.0401	0.0175	1.6	2519	2420	4994	0.00185371	7.08716e-07	12.621	10.8673	0.0919001	1.16137	9.75915	3.53652	23.4883	21.7753
2021-05-16	5-258	N5	0.6145	0.2455	0.0389	0.0163	1.5	2522	2409	4981	0.000698674	2.91346e-07	11.9271	12.5566	0.0670585	0.949863	9.96779	3.6261	24.4837	22.2181
2021-05-16	5-259	N5	0.3679	0.1612	0.022	0.0071	1.3	2474	2321	4980	0.000566854	9.90441e-08	6.87429	7.42609	0.0550583	0.925694	7.98863	2.97922	14.3004	17.4826
2021-05-16	5-260	N5	0.4544	0.2037	0.0387	0.0196	1.4	2477	2337	4982	0.000673356	9.00787e-08	9.83389	9.64987	0.0499254	1.01907	8.97313	3.33464	19.4838	19.8632
2021-05-16	5-261	N5	0.3081	0.1232	0.0188	0.0084	1.1	2508	2422	4975	0.000874238	2.09853e-07	6.95336	7.82636	0.0649534	0.888454	7.96301	2.81499	14.7797	17.6277
2021-05-16	5-262	N5	0.3221	0.1324	0.0197	0.0091	1.2	2506	2326	4843	0.00108131	2.2747e-07	6.33507	7.41208	0.0834716	0.854695	7.22716	2.71667	13.7472	16.3489
2021-05-16	5-263	N5	0.3419	0.1551	0.0198	0.0119	1.2	2529	2264	4974	0.00103767	3.00444e-07	7.93367	6.97121	0.106005	1.13806	8.11705	2.9253	14.9049	17.9384
2021-05-16	5-264	N5	0.6058	0.2499	0.0516	0.0197	1.6	2476	2441	4990	0.00194255	1.46047e-07	10.298	12.2405	0.153815	0.841302	9.36164	3.92017	22.5384	21.006
2021-05-16	5-265	N5	0.415	0.1688	0.0341	0.0154	1.5	2541	2390	4987	0.000418892	1.03877e-07	8.30186	8.15691	0.0900912	1.01777	8.46587	3.16232	16.4588	18.8056
2021-05-16	5-266	N5	0.831	0.3433	0.0542	0.0235	1.7	2595	2375	4992	0.00245746	2.96591e-06	14.6529	16.9328	0.114794	0.865358	11.1012	4.36884	31.5858	24.9381
2021-05-16	5-267	N5	0.665	0.2736	0.0502	0.0119	1.5	2641	2337	4984	0.000457438	1.14128e-07	13.644	13.3546	0.0374978	1.02167	10.5054	4.21937	26.9986	23.6311
2021-05-16	5-268	N5	0.5181	0.2122	0.0584	0.0245	1.6	2579	2407	4994	0.000798118	2.62655e-07	10.9564	11.7525	0.050186	0.932264	9.39869	3.82194	22.7089	21.2629
2021-05-16	5-269	N5	0.5429	0.2096	0.0426	0.0127	1.5	2579	2407	4994	0.000798118	2.62655e-07	10.9564	11.7525	0.050186	0.932264	9.39869	3.82194	22.7089	21.2629
2021-05-16	5-270	N5	0.5791	0.2427	0.0437	0.0181	1.7	2427	2419	4978	0.000345666	7.46951e-08	11.1317	11.2534	0.0435408	0.989181	9.53012	3.55214	22.3851	21.3368
2021-05-16	5-271	N5	0.5907	0.2358	0.043	0.0231	1.6	2459	2358	4990	0.000631454	1.67199e-07	12.5241	13.1234	0.0353238	0.95433	9.9336	4.11195	25.6475	22.612
2021-05-16	5-272	N5	0.7231	0.3047	0.0574	0.0248	1.7	2489	2318	4995	0.00136348	6.97413e-07	12.4076	13.7673	0.0957862	0.901239	10.0511	4.14381	26.1749	22.7948
2021-05-16	5-273	N5	0.8336	0.364	0.06	0.0256	1.8	2580	2408	4993	0.000514502	9.87954e-08	14.677	14.9353	0.042875	0.98271	10.6027	4.19788	29.6123	24.0596
2021-05-16	5-274	N5	0.4737	0.1813	0.0389	0.0136	1.5	2567	2406	4974	0.000676177	1.51399e-07	10.3975	9.80058	0.0477905	1.0609	9.19685	3.31216	20.198	20.5357
2021-05-16	5-275	N5	0.711	0.2972	0.0648	0.0247	2.2	2558	2380	4976	0.00356949	2.40371e-06	14.9564	11.3883	0.154524	1.31331	11.4083	3.82799	26.3446	24.7278
2021-05-16	5-276	N5	0.5064	0.2103	0.0369	0.0139	1.5	2499	2418	4989	0.00137481	3.78646e-07	9.7019	11.0705	0.0822076	0.876373	9.30648	3.66098	20.7724	20.7107
2021-05-16	5-277	N5	0.5494	0.2322	0.0434	0.0219	1.6	2542	2395	4988	0.000624986	9.15359e-08	11.2864	10.8499	0.0548604	1.04023	9.72356	3.70745	22.1363	21.5942
2021-05-16	5-278	N5	0.7019	0.2927	0.0604	0.0222	1.7	2482	2339	4997	0.000690944	2.04203e-07	13.0091	12.4287	0.0527664	1.0467	10.084	4.05296	25.4377	22.7059
2021-05-16	5-279	N5	0.5719	0.2214	0.0424	0.0177	1.4	2545	2357	4992	0.000795119	2.51787e-07	11.3536	11.2794	0.0645155	1.00658	9.18285	3.69766	22.633	20.9085
2021-05-16	5-280	N5	0.6472	0.2723	0.0486	0.0211	1.6	2543	2441	4985	0.000518043	1.42484e-07	12.0881	12.1128	0.0600073	0.997961	9.69186	3.64729	24.2008	21.7319
2021-05-16	5-281	N5	0.537	0.2205	0.0356	0.0122	1.5	2630	2328	4994	0.00117689	3.11052e-07	12.1292	10.9538	0.0623573	1.1073	9.68582	3.68233	23.083	21.6266
2021-05-16	5-282	N5	0.6508	0.2873	0.0535	0.0151	1.7	2596	2330	4983	0.000475534	9.01775e-08	12.0322	12.0923	0.0511957	0.99503	10.1829	3.79056	24.1245	22.703
2021-05-16	5-283	N5	0.4894	0.2076	0.0417	0.0181	1.6	2566	2404	4980	0.000427252	6.30146e-08	9.96829	10.2034	0.0484047	0.976953	9.48547	3.48965	20.1717	20.7825
2021-05-16	5-284	N5	0.54	0.2146	0.0396	0.0153	1.6	2596	2358	4984	0.000717831	2.60174e-07	11.4472	11.2971	0.0744715	1.01329	8.77622	4.08678	22.7443	20.5967
2021-05-16	5-285	N5	0.803	0.3317	0.0679	0.0257	2.2	2597	2371	4983	0.00359374	3.80966e-06	13.3355	16.89	0.124097	0.789548	12.1806	4.01824	30.2255	26.4282
2021-05-16	5-286	N5	0.761	0.3085	0.0615	0.0221	2.1	2570	2387	4997	0.00201067	9.38632e-07	15.5825	13.5718	0.0873119	1.14815	11.5411	4.06169	29.1543	25.2758
2021-05-16	5-287	N5	0.619	0.2477	0.0447	0.0151	1.6	2570	2387	4997	0.00201067	9.38632e-07	15.5825	13.5718	0.0873119	1.14815	11.5411	4.06169	29.1543	25.2758
2021-05-16	5-288	N5	0.7119	0.2928	0.0541	0.0187	1.7	2591	2314	4989	0.000353315	1.29516e-07	14.714	14.6791	0.0367946	1.00237	10.7308	4.19015	29.3931	24.3168
2021-05-16	5-289	N5	0.5779	0.2461	0.046	0.0191	1.8	2481	2408	4989	0.000343403	6.27842e-08	10.9121	11.1888	0.0268735	0.975272	9.68677	3.54768	22.1008	21.4701
2021-05-16	5-290	N5	0.6468	0.2506	0.0549	0.0141	1.7	2595	2367	4999	0.00138355	7.39965e-07	14.7938	13.4728	0.0759202	1.09805	10.935	3.86454	28.2666	24.3853
2021-05-16	5-291	N5	0.5234	0.2083	0.0387	0.0122	1.4	2509	2434	4979	0.000691578	1.79743e-07	10.3235	10.6948	0.0781927	0.96528	9.24658	3.61695	21.0182	20.8346
2021-05-16	5-292	N5	0.4523	0.1678	0.0323	0.0106	1.7	2549	2397	4991	0.000944804	4.39299e-07	10.0693	10.7118	0.0836948	0.940023	9.52408	3.47615	20.7811	21.2085
2021-05-16	5-293	N5	0.5147	0.2143	0.0574	0.0243	1.8	2462	2334	4990	0.00166192	5.85062e-07	10.909	12.257	0.100004	0.890021	9.52142	3.72099	23.166	21.7184
2021-05-16	5-294	N5	0.7245	0.3253	0.0562	0.0231	1.6	2525	2401	4995	0.00201879	8.11912e-07	11.7739	13.6702	0.13022	0.861283	10.803	3.88451	25.4441	23.727
2021-05-16	5-295	N5	0.3744	0.1487	0.0202	0.0057	1	2606	2221	4991	0.00215347	1.33196e-06	9.13227	7.02349	0.162762	1.30025	7.78311	3.09869	16.1558	17.8863
2021-05-16	5-296	N5	0.5447	0.2375	0.0373	0.0195	1.4	2565	2413	4984	0.00109243	4.19593e-07	9.44748	10.4399	0.0820802	0.904941	9.0602	3.57496	19.8874	20.0923
2021-05-16	5-297	N5	0.5772	0.2392	0.0436	0.0169	1.5	2513	2232	4984	0.00240968	2.55503e-06	12.8871	10.6034	0.145949	1.21537	9.6112	3.9103	23.4905	21.7536
2021-05-16	5-298	N5	0.4108	0.1635	0.0204	0.0078	1	2613	2341	4994	0.000776029	3.30042e-07	9.02675	8.31458	0.0587693	1.08565	8.43447	3.21274	17.3413	18.8008
2021-05-16	5-299	N5	0.5146	0.2096	0.0305	0.0088	1.2	2556	2385	4989	0.0028225	1.52032e-06	11.7464	8.98294	0.158397	1.30764	8.85361	3.71573	20.7294	19.9712
2021-05-16	5-300	N5	0.6648	0.2787	0.0638	0.0243	2.2	2577	2340	4986	0.00258521	1.99293e-06	12.896	15.3895	0.0960949	0.837976	10.6456	3.99128	28.2855	23.85
2021-05-16	5-301	N5	0.5935	0.2566	0.0452	0.0172	1.5	2588	2390	4992	0.00157721	5.96029e-07	10.8453	12.2394	0.125125	0.886093	9.98848	3.71573	23.0847	22.0967
2021-05-16	5-302	N5	0.569	0.2315	0.0452	0.0152	1.7	2524	2361	4994	0.00109606	3.85924e-07	12.5537	12.4532	0.0900063	1.00807	10.2554	3.76377	25.007	22.7356
2021-05-16	5-303	N5	0.4716	0.1891	0.0314	0.0119	1.3	2574	2390	4983	0.00156046	3.20424e-07	9.5872	11.1452	0.1197	0.86021	9.63225	3.49625	20.7324	21.2692
2021-05-16	5-304	N5	0.4881	0.1947	0.041	0.0116	1.5	2536	2306	4993	0.000753242	1.0554e-07	10.7512	10.1907	0.0578103	1.05499	8.91968	3.44859	20.9419	20.1983
2021-05-16	5-305	N5	0.4764	0.1993	0.0343	0.0148	1.5	2566	2376	4946	0.000446959	8.25965e-08	9.56007	9.9554	0.0430264	0.96029	9.42714	3.14433	19.5155	20.5755
2021-05-16	5-306	N5	0.4832	0.19	0.0416	0.0194	1.7	2551	2288	4988	0.00276376	1.63005e-06	12.1625	9.42003	0.139751	1.29113	9.63227	3.69456	21.5825	21.4522
2021-05-16	5-307	N5	0.631	0.2763	0.0541	0.0188	1.9	2482	2238	4972	0.000447601	1.51742e-07	9.52052	9.84719	0.0574921	0.966826	8.60531	3.30859	19.3677	19.6397
2021-05-16	5-308	N5	0.5047	0.2069	0.0484	0.0159	1.8	2527	2438	4988	0.000767649	1.61044e-07	10.1195	10.7677	0.0451166	0.939805	9.094	3.69503	20.8872	20.2568
2021-05-16	5-310	N5	0.6505	0.2651	0.0394	0.0161	1.4	2589	2372	4988	0.000887433	2.41839e-07	12.8212	13.4396	0.0585261	0.953981	9.75641	4.00447	26.2608	22.2579
2021-05-16	5-311	N5	0.5131	0.2146	0.0324	0.0129	1.6	2587	2325	4980	0.00308057	2.0952e-06	12.1241	9.04356	0.172181	1.34064	9.19793	3.71868	21.1677	20.5959
2021-05-16	5-312	N5	0.5419	0.2132	0.0395	0.0087	1.6	2595	2336	4991	0.00339295	3.17505e-06	13.9497	10.5626	0.152039	1.32067	10.0785	3.68432	24.5123	22.4497
2021-05-16	5-313	N5	0.5618	0.2167	0.0394	0.0129	1.5	2505	2336	4973	0.000710959	2.45938e-07	12.6641	11.984	0.0449363	1.05675	9.94711	3.73471	24.6481	22.122
2021-05-16	5-314	N5	0.8983	0.3879	0.0497	0.02	1.5	2626	2329	4975	0.00173046	1.2436e-06	15.4261	17.0844	0.0585122	0.902933	10.8841	4.57817	32.5105	24.8376
2021-05-16	5-315	N5	0.4014	0.1641	0.0379	0.014	1.7	2576	2387	4984	0.000517045	9.15152e-08	8.44005	8.8889	0.0542095	0.949504	8.9912	3.14499	17.329	19.6002
2021-05-16	5-316	N5	0.4943	0.2142	0.032	0.0121	1.5	2521	2310	4987	0.00236724	9.95497e-07	8.04825	10.4063	0.151563	0.773405	8.74678	3.34784	18.4545	19.5614
2021-05-16	5-317	N5	0.5141	0.2255	0.0372	0.0152	1.5	2484	2422	4978	0.0013909	1.23742e-06	10.6949	9.47849	0.0752443	1.12834	9.43479	3.41015	20.1734	20.7491
2021-05-16	5-318	N5	0.4836	0.2062	0.0314	0.012	1.6	2496	2296	4990	0.000188975	1.75868e-08	10.0885	10.1308	0.022141	0.995824	8.58882	3.40425	20.2193	19.537
2021-05-16	5-319	N5	0.543	0.2332	0.049	0.0176	1.8	2530	2456	4993	0.000678394	1.09225e-07	11.2352	11.7298	0.0384992	0.957832	9.56763	3.58748	22.965	21.2961
2021-05-16	5-320	N5	0.4281	0.1762	0.0303	0.0135	1.3	2422	2269	4993	0.000697408	3.57692e-07	9.75218	9.0828	0.0528868	1.0737	8.4559	3.29076	18.835	18.9392
2021-05-16	5-321	N5	0.4878	0.1987	0.0359	0.0115	1.6	2543	2417	4990	0.0022788	1.2397e-06	9.81769	12.0767	0.12211	0.812944	9.35949	3.56602	21.8944	20.9202
2021-05-16	5-322	N5	0.5618	0.2472	0.0384	0.0155	1.4	2605	2372	4986	0.000622931	2.91495e-07	11.7139	11.6185	0.0710505	1.0082	9.70771	3.69201	23.3324	21.6402
2021-05-16	5-323	N5	0.5417	0.2188	0.0468	0.0137	1.7	2589	2328	4970	0.00124895	3.44461e-07	11.7144	12.9335	0.10656	0.90574	10.511	3.56068	24.6479	23.1816
2021-05-16	5-324	N5	0.6083	0.2684	0.039	0.0149	1.5	2605	2368	4986	0.00176926	4.15006e-07	12.5591	10.8029	0.0939848	1.16257	9.85481	3.5336	23.3621	21.863
2021-05-16	5-326	N5	0.486	0.2204	0.0279	0.0125	1.1	2607	2277	4976	0.000861448	2.51642e-07	8.22806	8.61666	0.0679979	0.954902	8.57277	3.29678	16.8447	19.2858
2021-05-16	5-327	N5	0.8052	0.3544	0.0382	0.0161	1.3	2672	2276	5007	0.00164327	1.01104e-06	15.2503	13.6635	0.0842513	1.11613	10.659	4.17381	28.9139	24.1489
2021-05-16	5-328	N5	0.495	0.1934	0.0353	0.0098	1.4	2434	2268	4982	0.00230921	1.24554e-06	10.7373	8.46886	0.143513	1.26786	8.72485	3.36247	19.2062	19.6845
2021-05-16	5-329	N5	0.4489	0.2074	0.0311	0.0154	1.3	2584	2268	4978	0.0032859	1.6068e-06	12.9099	9.62411	0.180674	1.34141	9.42839	3.71566	22.534	21.3727
2021-05-16	5-330	N5	0.5745	0.2393	0.0364	0.0112	1.4	2557	2407	4989	0.000820206	8.33771e-07	12.8096	12.1971	0.0764372	1.05021	10.1501	3.69777	25.0067	22.7319
2021-05-16	5-331	N5	0.3384	0.1495	0.0253	0.0064	1.3	2527	2352	4992	0.000733275	2.0687e-07	8.06737	8.79398	0.0585478	0.917374	8.16211	3.21872	16.8614	18.5037
2021-05-16	5-332	N5	0.4105	0.1782	0.0273	0.0111	1.4	2568	2412	4995	0.000898383	1.76348e-07	10.1449	9.25256	0.0559809	1.09644	8.79267	3.2609	19.3974	19.7412
2021-05-16	5-333	N5	0.508	0.2072	0.0262	0.0103	1.2	2454	2450	4980	0.000648773	1.3275e-07	11.2352	10.6294	0.0498694	1.057	8.98226	3.67676	21.8646	20.4304
2021-05-16	5-334	N5	0.3845	0.1711	0.0379	0.0137	1.9	2418	2310	4892	0.000976547	1.79568e-07	7.91702	6.94094	0.0795796	1.14063	7.77017	2.94044	14.858	17.1668
2021-05-16	5-335	N5	0.5086	0.2271	0.0327	0.0132	1.5	2648	2316	4983	0.00121938	4.46719e-07	9.39947	8.24202	0.0949694	1.14043	8.1508	3.18008	17.6415	18.5763
2021-05-16	5-336	N5	0.4296	0.1743	0.0236	0.008	1.1	2638	2337	4983	0.00044184	1.01065e-07	9.5719	9.26906	0.0573813	1.03267	8.84454	3.27565	18.841	19.7475
2021-05-16	5-337	N5	0.3845	0.1616	0.0217	0.0094	1	2625	2342	4993	0.000497381	7.81212e-08	8.34019	7.8475	0.0397192	1.06278	8.23712	3.12598	16.1877	18.2873
2021-05-16	5-338	N5	0.4865	0.2044	0.0276	0.011	1.1	2572	2338	4981	0.00115313	4.34547e-07	9.53266	10.5573	0.0694028	0.902947	8.97021	3.43074	20.0899	20.054
2021-05-16	5-339	N5	0.4388	0.1877	0.0253	0.0114	1.1	2426	2315	4989	0.00134428	4.27578e-07	9.71081	8.38005	0.0835774	1.1588	8.51569	3.40394	18.0909	19.1411
2021-05-16	5-340	N5	0.3832	0.1514	0.0258	0.0094	1.3	2497	2442	4988	0.000497721	1.55862e-07	9.45397	9.22054	0.0616308	1.02532	8.72482	3.29352	18.6745	19.3572
2021-05-16	5-341	N5	0.5423	0.2375	0.0397	0.0126	1.6	2462	2323	4995	0.00349999	2.01153e-06	9.928	13.3309	0.186992	0.744738	9.38043	3.65575	23.2589	21.2456
2021-05-16	5-342	N5	0.3944	0.1577	0.0262	0.0066	1.1	2535	2434	4986	0.00138918	2.5483e-07	9.10139	10.4873	0.0933382	0.86785	8.96309	3.28697	19.5887	20.033
2021-05-16	5-343	N5	0.4957	0.2463	0.0313	0.0154	1.5	2590	2355	5009	0.00120987	1.96961e-07	8.81774	10.0274	0.0822736	0.879362	8.42622	3.45864	18.8452	19.0989
2021-05-16	5-345	N5	0.4202	0.1904	0.0283	0.0127	1.5	2505	2339	4986	0.000350526	1.16028e-07	8.43609	8.22692	0.0340831	1.02543	7.98846	3.13194	16.663	18.1219
2021-05-16	5-346	N5	0.299	0.1139	0.0208	0.0065	1.2	2407	2333	4909	0.00110898	2.57807e-07	7.80274	6.69792	0.0852261	1.16495	7.7307	2.96414	14.5007	17.1178
2021-05-16	5-347	N5	0.5971	0.2554	0.0375	0.0135	1.4	2496	2308	4974	0.00102236	3.75872e-07	12.6334	11.7551	0.0689745	1.07472	9.74757	3.96185	24.3884	22.1519
2021-05-16	5-348	N5	0.6545	0.2785	0.0437	0.0177	1.6	2533	2381	4985	0.00184691	1.01347e-06	14.111	12.2756	0.0695145	1.14952	10.3105	3.85427	26.3866	22.862
2021-05-16	5-349	N5	0.485	0.198	0.0268	0.0105	1.1	2584	2349	4996	0.00440774	4.23024e-06	13.2002	8.86157	0.223682	1.4896	9.13655	3.67087	22.0618	20.8882
2021-05-16	5-350	N5	0.4656	0.2041	0.0245	0.0109	1.1	2593	2340	4983	0.000924009	3.65681e-07	10.7585	10.0841	0.0587459	1.06689	9.21779	3.57199	20.8426	20.8093
2021-05-16	5-351	N5	0.4452	0.1982	0.0301	0.0103	1.3	2577	2267	4979	0.00101428	3.97881e-07	9.57589	9.47207	0.0952035	1.01096	9.60508	3.25164	19.048	21.1554
2021-05-16	5-352	N5	0.4624	0.199	0.0314	0.0155	1.4	2608	2361	4992	0.000473602	7.25036e-08	9.84456	10.0904	0.0474272	0.975639	9.64279	3.40315	19.9349	21.1259
2021-05-16	5-353	N5	0.4658	0.2022	0.0339	0.0147	1.5	2530	2413	4998	0.00068951	4.10614e-07	10.4547	10.0975	0.0836341	1.03538	8.89342	3.40778	20.5522	19.8923
2021-05-16	5-354	N5	0.385	0.1567	0.0293	0.0128	1.4	2588	2382	4979	0.00190239	7.29271e-07	7.98004	9.79252	0.138859	0.814911	8.40131	3.31812	17.7726	18.6686
2021-05-16	5-355	N5	0.3286	0.1431	0.0216	0.0088	1.1	2533	2380	4989	0.00115854	6.9849e-07	6.78584	7.79381	0.108711	0.87067	8.0506	2.86339	14.5796	17.7958
2021-05-16	5-356	N5	0.4326	0.1831	0.0299	0.0116	1.2	2626	2352	4984	0.00139007	2.27377e-07	10.0739	8.68379	0.105634	1.16008	8.41161	3.54554	18.7577	19.1038
2021-05-16	5-357	N5	0.5213	0.2262	0.0355	0.0121	1.5	2526	2403	4989	0.00234623	8.97258e-07	10.0136	12.358	0.129558	0.810291	9.67715	3.5361	22.3716	21.4988
2021-05-16	5-358	N5	0.3943	0.172	0.0271	0.0158	1.2	2487	2455	4967	0.00205393	4.37945e-07	7.31166	9.36359	0.167073	0.780861	8.12631	3.08098	16.6752	18.1441
2021-05-16	5-359	N5	0.2649	0.1187	0.0206	0.0088	1.1	2177	2166	4546	0.00218937	8.42974e-07	5.4383	7.61614	0.190908	0.714049	6.90221	2.94658	13.0544	15.6533
2021-05-16	5-360	N5	0.6032	0.265	0.0402	0.0115	1.6	2546	2404	4976	0.0014177	3.14088e-07	12.4158	11.0109	0.0721415	1.12759	9.61476	3.6233	23.4268	21.516
2021-06-15	6-001	N6	0.5844	0.2642	0.0363	0.0141	1.2	2500	2342	4981	0.00131947	4.82896e-07	14.0833	14.2854	0.0928677	0.985853	10.6562	4.21591	28.3688	23.8529
2021-06-15	6-002	N6	0.4797	0.2188	0.0284	0.012	1	2539	2420	4982	0.00177115	6.06455e-07	8.51171	10.2828	0.143575	0.827763	8.58757	3.50019	18.7945	19.3713
2021-06-15	6-003	N6	0.7835	0.3467	0.053	0.0203	1.6	2554	2329	4979	0.00123734	2.81921e-07	15.1456	15.6259	0.0681305	0.96926	10.665	4.30553	30.7714	24.0184
2021-06-15	6-004	N6	0.517	0.2456	0.0346	0.0158	1.1	2575	2404	4990	0.00120955	4.2913e-07	10.1243	9.79423	0.120102	1.0337	9.45567	3.42841	19.9186	20.673
2021-06-15	6-005	N6	0.4644	0.2097	0.023	0.0101	1	2558	2353	4978	0.000549056	9.80735e-08	9.83814	9.37786	0.0468998	1.04908	8.63193	3.40731	19.216	19.2141
2021-06-15	6-006	N6	0.4775	0.2258	0.032	0.0129	1.2	2527	2442	4990	0.000986424	2.50069e-07	10.3616	9.93309	0.0736199	1.04314	9.4739	3.4345	20.2947	20.6849
2021-06-15	6-007	N6	0.5338	0.2511	0.0363	0.0109	1.3	2431	2409	4965	0.00108639	1.58102e-07	9.45499	10.5411	0.110479	0.896964	8.71294	3.55404	19.9961	19.5613
2021-06-15	6-008	N6	0.6006	0.2743	0.047	0.0219	1.7	2529	2462	4985	0.000645237	2.61339e-07	11.7216	11.8422	0.0941975	0.989816	9.47448	3.97369	23.5638	21.1676
2021-06-15	6-010	N6	0.5378	0.2416	0.0282	0.0099	1.1	2481	2400	4974	0.00131715	2.00554e-07	10.4001	11.7173	0.100465	0.887589	9.08592	3.68952	22.1174	20.3041
2021-06-15	6-011	N6	0.4427	0.204	0.028	0.0119	1.1	2530	2390	4973	0.00041533	8.04298e-08	8.93388	8.67453	0.0320567	1.0299	8.47923	3.30539	17.6084	18.8325
2021-06-15	6-012	N6	0.6709	0.3092	0.0421	0.0192	1.4	2490	2453	4987	0.00206128	9.42088e-07	11.8755	13.9368	0.11491	0.852098	10.3298	3.85941	25.8124	22.7461
2021-06-15	6-013	N6	0.4	0.1805	0.0276	0.0112	1.1	2481	2429	4950	0.000807241	2.67096e-07	10.192	9.51222	0.0525105	1.07146	9.11454	3.64712	19.7042	20.4001
2021-06-15	6-014	N6	0.6394	0.2674	0.0307	0.0108	0.9	2561	2413	4987	0.000379197	7.6531e-08	16.4737	16.4666	0.025814	1.00043	11.1504	4.3439	32.9402	25.2609
2021-06-15	6-015	N6	0.6667	0.2828	0.0533	0.018	1.7	2458	2453	4998	0.00278802	1.17382e-06	15.2101	17.9802	0.0993371	0.845939	11.6212	4.15035	33.1903	26.1106
2021-06-15	6-016	N6	0.6621	0.312	0.033	0.0143	1.2	2509	2407	4984	0.00300482	1.96083e-06	11.2475	14.2347	0.135352	0.790149	9.90075	3.93519	25.4823	22.0892
2021-06-15	6-017	N6	0.4382	0.1992	0.026	0.011	1.1	2573	2362	4964	0.000325014	4.73886e-08	8.91126	8.90491	0.0415674	1.00071	8.35725	3.24898	17.8162	18.5473
2021-06-15	6-018	N6	0.6702	0.2792	0.0421	0.0143	1.3	2546	2306	4983	0.00141978	5.2656e-07	16.8646	17.9942	0.0505394	0.937222	11.9285	4.17978	34.8588	26.6898
2021-06-15	6-019	N6	0.7649	0.3445	0.0465	0.0208	1.4	2553	2425	4988	0.00315944	1.72922e-06	13.6181	16.7248	0.133884	0.814243	10.7345	4.37768	30.3429	23.9885
2021-06-15	6-020	N6	0.6667	0.2915	0.0411	0.0175	1.2	2467	2415	4987	0.000962658	3.33808e-07	14.503	15.4081	0.0393218	0.941256	10.9119	4.25226	29.9111	24.1279
2021-06-15	6-021	N6	0.8613	0.4046	0.0481	0.0206	1.6	2582	2387	4978	0.00162428	5.04673e-07	14.3065	15.9154	0.0779387	0.898911	10.9506	4.42577	30.2219	24.9228
2021-06-15	6-022	N6	0.6469	0.2915	0.0589	0.0233	2	2498	2456	4982	0.000705602	1.6629e-07	12.9989	13.0004	0.0611397	0.999888	10.1	3.85982	25.9992	22.3915
2021-06-15	6-023	N6	0.8485	0.3907	0.0519	0.0261	1.7	2563	2392	4972	0.00164101	6.05652e-07	14.8384	16.4794	0.0635247	0.900421	10.5234	4.58168	31.3177	24.296
2021-06-15	6-024	N6	0.7106	0.3235	0.0492	0.0204	1.6	2503	2448	4981	0.00304849	2.04984e-06	11.6031	14.6516	0.14977	0.791934	10.1439	3.97914	26.2546	22.569
2021-06-15	6-025	N6	0.4143	0.1643	0.0312	0.011	1.8	2448	2528	4986	0.00170844	4.84568e-07	9.86241	11.528	0.105884	0.855515	9.20425	3.61703	21.3904	21.0555
2021-06-15	6-026	N6	0.4929	0.2148	0.0343	0.012	1.4	2453	2432	4978	0.00141047	4.62959e-07	10.2808	11.6788	0.0760747	0.880292	9.261	3.72768	21.9596	21.1318
2021-06-15	6-027	N6	0.6316	0.2613	0.0408	0.0154	1.4	2448	2421	4981	0.00376474	2.66026e-06	13.767	17.5313	0.13089	0.785282	11.0483	4.23655	31.2983	24.5428
2021-06-15	6-028	N6	0.6763	0.283	0.0407	0.016	1.3	2546	2435	4995	0.004088	5.63223e-06	17.7943	13.9739	0.153004	1.2734	11.5666	4.13954	31.7682	25.4072
2021-06-15	6-029	N6	0.7022	0.3196	0.0338	0.0163	1.1	2481	2407	4980	0.00188315	9.46907e-07	14.7922	13.0927	0.0978102	1.1298	10.4555	4.108	27.8849	23.3021
2021-06-15	6-030	N6	0.6545	0.2901	0.0421	0.0133	1.4	2526	2447	4987	0.00374975	1.51394e-06	12.081	15.8308	0.174773	0.763135	10.3063	4.20109	27.9118	23.1456
2021-06-15	6-031	N6	0.5716	0.2467	0.0445	0.0193	1.6	2535	2418	4985	0.00265821	1.72754e-06	14.0708	11.5216	0.124234	1.22126	9.90421	3.99234	25.5924	22.1749
2021-06-15	6-032	N6	0.5914	0.274	0.0375	0.0154	1.1	2528	2385	4993	0.00127162	5.40647e-07	11.5544	12.6568	0.0641249	0.912905	10.0278	3.79383	24.2112	22.1782
2021-06-15	6-033	N6	0.3692	0.174	0.0229	0.0112	0.9	2498	2386	4978	0.000757599	1.55333e-07	7.40063	8.15589	0.121535	0.907398	8.2803	3.10547	15.5565	18.2667
2021-06-15	6-034	N6	0.642	0.2879	0.0354	0.015	1.1	2529	2443	4980	0.0015605	5.87839e-07	14.356	12.9443	0.0756688	1.10906	10.3747	4.10408	27.3002	23.1342
2021-06-15	6-035	N6	0.3438	0.1461	0.0269	0.01	1.2	2530	2461	4998	0.00249988	1.79969e-06	7.61561	10.1033	0.157839	0.753776	8.98019	3.1376	17.7189	19.6937
2021-06-15	6-036	N6	0.7779	0.3345	0.0332	0.0137	1	2558	2408	4968	0.000777206	2.26304e-07	14.6313	15.3965	0.0658436	0.950303	11.096	4.20319	30.0278	25.0574
2021-06-15	6-037	N6	0.4847	0.21	0.0251	0.0085	0.9	2540	2436	4988	0.000413299	8.20017e-08	10.5146	10.3044	0.0447883	1.0204	8.75195	3.68289	20.819	19.7595
2021-06-15	6-038	N6	0.7874	0.3185	0.0534	0.023	1.7	2532	2422	4985	0.00311315	1.42837e-06	13.6897	16.8029	0.120837	0.814726	10.7816	4.18276	30.4926	24.6262
2021-06-15	6-039	N6	0.5016	0.2184	0.0335	0.0133	1.4	2539	2410	4978	0.0017056	4.83113e-07	11.8773	13.5366	0.0950258	0.877425	10.4826	3.78767	25.4139	22.8406
2021-06-15	6-040	N6	0.6128	0.2628	0.0343	0.0151	1.2	2437	2386	4997	0.00332339	1.08395e-06	11.4312	14.7546	0.173438	0.774755	10.2937	4.03912	26.1858	22.8061
2021-06-15	6-041	N6	0.3919	0.1701	0.0269	0.0119	1.2	2554	2452	4992	0.00309623	2.55649e-06	8.45457	11.5338	0.21948	0.733024	9.71025	3.30097	19.9884	21.1373
2021-06-15	6-042	N6	0.6585	0.2841	0.0358	0.013	1.2	2530	2396	4985	0.000584531	1.68371e-07	14.7212	14.9382	0.0379509	0.985475	10.2063	4.38543	29.6594	23.2172
2021-06-15	6-043	N6	0.6808	0.288	0.0426	0.0138	1.4	2498	2474	4975	0.000754295	4.09209e-07	14.7093	14.3048	0.0605656	1.02828	9.95043	4.36424	29.0142	22.7428
2021-06-15	6-044	N6	0.5366	0.2281	0.0281	0.0104	1.1	2451	2429	4981	0.00072786	2.3841e-07	14.1602	14.3553	0.0354859	0.986413	11.0152	3.95225	28.5155	24.192
2021-06-15	6-045	N6	0.632	0.2795	0.0514	0.0228	1.8	2553	2428	4992	0.00278669	2.54831e-06	12.8883	15.5386	0.104844	0.829438	11.1174	3.88949	28.4269	24.3141
2021-06-15	6-046	N6	0.4974	0.2126	0.0399	0.0146	1.6	2497	2424	4981	0.00287231	1.12127e-06	10.9015	13.7679	0.137717	0.791809	10.093	3.52354	24.6695	22.2492
2021-06-15	6-047	N6	0.5604	0.2443	0.0422	0.0143	1.5	2404	2427	4952	0.00203618	5.96567e-07	11.6768	13.7031	0.0920559	0.852131	9.9284	3.79654	25.3799	22.2442
2021-06-15	6-048	N6	0.508	0.2203	0.0304	0.0136	1.2	2565	2413	4990	0.00347337	1.63554e-06	13.8809	10.4099	0.159315	1.33344	9.95567	3.68919	24.2907	21.9628
2021-06-15	6-049	N6	0.6743	0.2912	0.0462	0.0203	1.6	2574	2328	4967	0.0007235	2.38912e-07	14.7637	14.2665	0.0566259	1.03485	10.7637	4.31158	29.0302	24.0697
2021-06-15	6-050	N6	0.5752	0.2513	0.041	0.0177	1.7	2552	2416	4995	0.000646085	4.49263e-07	13.5637	13.0731	0.0546191	1.03753	9.89984	4.07258	26.6368	22.3731
2021-06-15	6-051	N6	0.9233	0.3857	0.0432	0.0196	1.1	2535	2370	4985	0.00143575	5.20013e-07	17.4106	16.553	0.0951681	1.05181	11.9923	4.71311	33.9636	26.7007
2021-06-15	6-052	N6	0.4441	0.1952	0.0334	0.015	1.4	2519	2357	4971	0.000700417	3.10096e-07	10.5812	10.0095	0.0523957	1.05712	9.43451	3.69971	20.5908	20.9449
2021-06-15	6-053	N6	0.7559	0.336	0.0546	0.023	1.6	2485	2385	4994	0.000770371	3.12574e-07	15.5548	15.0546	0.057157	1.03322	11.0303	4.35052	30.6094	24.7642
2021-06-15	6-054	N6	0.7078	0.2912	0.0351	0.0141	1.2	2528	2416	4970	0.00132639	4.53983e-07	13.2116	14.4037	0.0744935	0.917239	10.2097	4.15676	27.6153	23.1963
2021-06-15	6-055	N6	0.5059	0.2201	0.0383	0.0159	1.6	2561	2393	4979	0.0012283	5.45583e-07	11.4263	12.5351	0.100292	0.911544	9.81154	3.82644	23.9614	21.9886
2021-06-15	6-056	N6	0.8661	0.3574	0.0378	0.0129	1.1	2647	2308	4986	0.00158631	1.28308e-06	17.1805	15.8229	0.0699387	1.08579	11.2548	4.73964	33.0034	25.5131
2021-06-15	6-057	N6	0.6926	0.3052	0.0492	0.0168	1.6	2547	2395	4979	0.00159076	6.27894e-07	14.3155	15.7707	0.0715553	0.907729	10.9732	4.34143	30.0862	24.5855
2021-06-15	6-058	N6	0.3989	0.1822	0.0374	0.0177	1.2	2647	2320	5003	0.00087717	2.34908e-07	9.12911	8.25198	0.0785856	1.10629	8.79987	3.27554	17.3811	19.4827
2021-06-15	6-059	N6	0.7445	0.3067	0.0521	0.019	1.7	2520	2396	4979	0.00266798	1.57859e-06	15.2191	17.8775	0.113226	0.851302	11.6985	4.17691	33.0966	25.729
2021-06-15	6-060	N6	0.7198	0.3002	0.0372	0.0157	1.3	2532	2382	4982	0.0014062	6.03368e-07	14.5927	13.1896	0.0777682	1.10638	10.0365	4.3193	27.7824	23.2071
2021-06-15	6-061	N6	0.9775	0.4222	0.0703	0.0279	1.7	2583	2340	4985	0.00320757	2.19641e-06	18.6	15.3926	0.108287	1.20837	11.3123	4.87159	33.9927	25.5023
2021-06-15	6-062	N6	0.7284	0.311	0.0465	0.017	1.4	2490	2452	4984	0.00208898	3.21773e-07	14.5095	16.5984	0.119636	0.874154	11.1261	4.27566	31.1079	24.5438
2021-06-15	6-063	N6	0.3358	0.1417	0.0295	0.0111	1.5	2525	2390	4976	0.000471897	9.73057e-08	8.89432	8.50033	0.0475668	1.04635	8.56008	3.22771	17.3947	18.7725
2021-06-15	6-064	N6	0.5287	0.2303	0.0454	0.0148	1.5	2432	2283	4981	0.00140164	5.99973e-07	8.50483	9.84553	0.0860904	0.863826	8.34467	3.71879	18.3504	18.9545
2021-06-15	6-065	N6	0.9489	0.4004	0.0569	0.0211	1.5	2516	2435	4993	0.00149337	1.03486e-06	16.0292	17.4829	0.0712162	0.916854	10.8806	4.74868	33.5121	25.0641
2021-06-15	6-066	N6	0.3419	0.1456	0.0311	0.0091	1.6	2479	2427	4985	0.000322473	6.02936e-08	8.74398	8.66075	0.0424358	1.00961	8.22499	3.3375	17.4047	18.2664
2021-06-15	6-067	N6	0.7731	0.3317	0.0488	0.0198	1.3	2475	2457	4988	0.00137469	1.20683e-06	13.8015	15.1516	0.107537	0.910897	10.8663	4.22227	28.9531	24.2718
2021-06-15	6-068	N6	0.4652	0.1975	0.0264	0.0142	1	2559	2401	4978	0.00115446	2.44805e-07	9.56095	8.46916	0.0884733	1.12891	9.06922	3.33252	18.0301	20.0975
2021-06-15	6-069	N6	0.6997	0.2867	0.0428	0.016	1.5	2523	2313	4997	0.00051113	2.15934e-07	13.7254	13.6512	0.0577546	1.00543	10.312	4.03317	27.3766	23.3957
2021-06-15	6-070	N6	1.0288	0.43	0.0648	0.0256	1.7	2578	2343	4978	0.00181084	4.26942e-07	17.9704	19.3982	0.0957406	0.926394	11.5554	5.13852	37.3686	26.5195
2021-06-15	6-071	N6	0.6607	0.2867	0.0476	0.0175	1.4	2478	2393	4977	0.00134135	4.58941e-07	15.0268	13.8307	0.0668888	1.08648	10.6023	4.36547	28.8575	23.5282
2021-06-15	6-072	N6	0.4557	0.1943	0.0386	0.0121	1.6	2559	2379	4989	0.000632604	1.84778e-07	10.7097	11.1247	0.0498714	0.962692	9.57204	3.44913	21.8345	21.1135
2021-06-15	6-073	N6	0.4342	0.1894	0.0239	0.0123	1.2	2508	2404	4928	0.000985722	2.19501e-07	10.6524	9.81126	0.0854041	1.08573	9.62911	3.36236	20.4636	21.0862
2021-06-15	6-074	N6	0.542	0.2224	0.0371	0.0137	1.5	2529	2413	4996	0.00118087	6.32381e-07	10.7118	11.6987	0.0571703	0.91564	9.8117	3.61994	22.4105	21.7963
2021-06-15	6-075	N6	0.2922	0.131	0.021	0.0095	1	2526	2450	4990	0.000564553	9.46023e-08	6.83115	7.08077	0.0724505	0.964747	7.97365	2.94331	13.9119	17.461
2021-06-15	6-076	N6	0.6583	0.2804	0.0621	0.0248	2	2497	2403	4980	0.000486807	1.50137e-07	15.0405	14.6255	0.0328298	1.02838	11.1352	3.94028	29.666	24.3811
2021-06-15	6-077	N6	0.3885	0.1628	0.0354	0.0117	1.6	2473	2373	4987	0.00190998	5.67582e-07	11.0199	9.10997	0.116423	1.20966	9.18581	3.44742	20.1299	20.1471
2021-06-15	6-078	N6	0.533	0.2188	0.0433	0.0149	1.6	2480	2346	4976	0.00154319	3.20843e-07	11.9562	13.4994	0.111822	0.885685	9.71279	3.97615	25.4557	21.7705
2021-06-15	6-079	N6	0.5443	0.2263	0.0522	0.0177	2	2515	2441	4992	0.00118738	4.18547e-07	12.0639	13.2498	0.0590657	0.910492	10.1648	3.67972	25.3137	22.3868
2021-06-15	6-080	N6	0.4468	0.1845	0.0339	0.0079	1.6	2581	2407	4990	0.00135764	5.01214e-07	11.4383	12.5868	0.0839283	0.908757	9.92628	3.77234	24.0252	21.8838
2021-06-15	6-081	N6	0.4567	0.1991	0.0427	0.0186	1.9	2538	2440	4994	0.000849045	2.6941e-07	12.1993	11.6688	0.0638818	1.04546	9.82975	3.73014	23.8681	21.6713
2021-06-15	6-082	N6	0.3109	0.1333	0.0258	0.0102	1.2	2558	2375	4985	0.000944082	2.03019e-07	7.1899	7.5644	0.108664	0.950491	7.97071	3.0512	14.7543	17.6277
2021-06-15	6-083	N6	0.5499	0.2303	0.052	0.0168	1.8	2546	2377	4979	0.00115101	1.28323e-07	12.2602	13.3994	0.0716795	0.914983	10.154	3.87468	25.6595	22.4348
2021-06-15	6-084	N6	0.4074	0.1704	0.0418	0.014	2	2538	2407	4986	0.00285706	1.51784e-06	12.2236	9.37182	0.139562	1.30429	9.42363	3.44672	21.5954	20.7911
2021-06-15	6-085	N6	0.5798	0.2309	0.0584	0.0206	2.1	2477	2390	4989	0.00101884	1.66566e-07	14.3242	13.4039	0.0585283	1.06866	10.3596	4.15584	27.7281	23.045
2021-06-15	6-086	N6	0.6756	0.3046	0.0516	0.0209	1.9	2522	2412	4984	0.00142859	4.62288e-07	14.8648	13.443	0.0744905	1.10577	10.8086	4.11394	28.3078	24.116
2021-06-15	6-087	N6	0.598	0.2609	0.0392	0.0154	1.4	2496	2415	4991	0.000983214	2.64861e-07	12.7698	13.115	0.062191	0.973678	10.0157	3.91565	25.8848	22.4015
2021-06-15	6-088	N6	0.4597	0.212	0.0361	0.0171	1.6	2563	2286	5000	0.0010255	2.38592e-07	10.8994	9.90666	0.0598375	1.10021	8.61769	3.64716	20.806	19.5756
2021-06-15	6-089	N6	0.5384	0.222	0.0422	0.0157	1.6	2533	2317	4986	0.002105	1.2289e-06	11.9024	13.5583	0.124027	0.877868	10.2097	4.00011	25.4606	22.9948
2021-06-15	6-090	N6	0.6884	0.2846	0.0435	0.0155	1.5	2549	2399	4992	0.00126767	4.79308e-07	16.6462	16.0779	0.0657455	1.03535	11.5308	4.25483	32.7241	25.4484
2021-06-15	6-091	N6	0.4017	0.1749	0.019	0.007	0.8	2470	2385	4891	0.00136155	3.46838e-07	7.69925	9.06078	0.121983	0.849735	7.40535	3.61436	16.76	17.461
2021-06-15	6-092	N6	0.4779	0.2008	0.0377	0.0115	1.3	2534	2453	4985	0.00104787	4.57405e-07	11.3546	12.3723	0.0983319	0.917742	9.65628	3.85951	23.7269	21.5777
2021-06-15	6-093	N6	0.7626	0.3141	0.0487	0.0187	1.5	2472	2389	4983	0.00513355	6.17959e-06	17.7584	12.8749	0.183097	1.37931	10.4769	4.60521	30.6333	24.0716
2021-06-15	6-094	N6	0.5698	0.2353	0.046	0.0165	1.6	2492	2396	4977	0.0013252	2.74165e-07	13.334	13.5677	0.0882067	0.982771	10.7534	3.96487	26.9017	23.5848
2021-06-15	6-095	N6	0.5111	0.2095	0.0342	0.01	1.5	2530	2442	4990	0.000846342	3.36282e-07	12.3751	13.0215	0.0476758	0.950359	9.90454	4.01511	25.3966	22.4154
2021-06-15	6-096	N6	0.3595	0.1584	0.0251	0.0102	1.4	2439	2324	4985	0.000694909	3.62115e-07	8.52501	8.88938	0.103233	0.95901	8.79748	3.24589	17.4144	19.3925
2021-06-15	6-097	N6	0.3326	0.1477	0.0308	0.0111	1.2	2325	2663	4986	0.00504651	4.45035e-06	6.05242	11.0902	0.378164	0.545744	8.89841	3.21869	17.1427	19.5438
2021-06-15	6-098	N6	0.4323	0.1921	0.0312	0.01	1.1	2499	2355	4988	0.000790128	3.489e-07	10.8343	10.4056	0.0686599	1.04121	9.51221	3.70076	21.2399	20.9488
2021-06-15	6-099	N6	0.656	0.2896	0.0427	0.0158	1.2	2520	2372	4987	0.000972513	3.75834e-07	14.7396	13.7894	0.0778974	1.06891	10.4914	4.15883	28.529	23.3374
2021-06-15	6-100	N6	0.725	0.3065	0.0522	0.0202	1.5	2530	2403	5009	0.00333015	2.62077e-06	13.3722	16.7012	0.121316	0.800673	11.1888	4.12584	30.0733	24.5907
2021-06-15	6-101	N6	0.3535	0.1597	0.0271	0.0102	1.3	2527	2449	4991	0.00087959	8.36804e-08	9.44541	8.56595	0.0647758	1.10267	9.07585	3.09621	18.0114	19.7017
2021-06-15	6-102	N6	0.5328	0.2464	0.0232	0.0146	1.2	2537	2339	4991	0.00257079	1.11159e-06	12.496	9.92527	0.137044	1.25901	9.77988	3.50943	22.4213	21.5027
2021-06-15	6-104	N6	0.6454	0.2808	0.0465	0.0176	1.6	2542	2282	4979	0.00144144	8.8801e-07	14.962	13.5808	0.0655753	1.1017	10.8689	4.04916	28.5428	24.4687
2021-06-15	6-105	N6	0.6044	0.251	0.0504	0.0185	1.7	2491	2415	4977	0.00143378	9.53568e-07	15.129	13.7225	0.0707154	1.10249	10.9896	3.95612	28.8515	24.1968
2021-06-15	6-106	N6	0.4187	0.1675	0.0303	0.0105	1.4	2454	2322	4991	0.000549106	1.17215e-07	10.344	10.5756	0.0476549	0.9781	9.26708	3.45539	20.9195	20.3321
2021-06-15	6-107	N6	0.4873	0.1924	0.0406	0.0138	1.6	2575	2376	4960	0.00183248	5.82065e-07	12.9251	11.1358	0.0991053	1.16068	9.90138	3.6228	24.0609	21.9007
2021-06-15	6-108	N6	0.4639	0.2085	0.0458	0.0185	1.8	2485	2457	4988	0.00095115	3.59829e-07	11.7458	11.0152	0.0629571	1.06632	10.3393	3.47342	22.761	22.3681
2021-06-15	6-109	N6	0.4164	0.1848	0.0453	0.0184	2	2442	2363	4987	0.000727799	7.18207e-08	10.5382	9.94579	0.0529587	1.05956	9.6709	3.24784	20.484	20.9629
2021-06-15	6-110	N6	0.3202	0.1477	0.0278	0.0114	1.2	2440	2327	4979	0.00126611	3.11392e-07	7.9203	9.18633	0.100335	0.862183	8.90214	2.99132	17.1066	19.3143
2021-06-15	6-111	N6	0.6274	0.2786	0.0441	0.0162	1.6	2515	2468	4989	0.0028234	9.28291e-07	13.6195	16.4429	0.13007	0.828291	11.0811	4.10092	30.0624	24.4561
2021-06-15	6-112	N6	0.4656	0.1936	0.0359	0.0115	1.4	2563	2373	4985	0.00190669	3.04832e-07	12.4773	10.5706	0.121006	1.18038	9.72242	3.69201	23.0479	21.4283
2021-06-15	6-113	N6	0.3249	0.1369	0.0235	0.0081	1.2	2524	2443	4989	0.00140193	3.28795e-07	7.82424	9.21285	0.108213	0.849274	8.30621	3.23611	17.0371	18.4464
2021-06-15	6-114	N6	0.4293	0.1944	0.0418	0.0174	1.4	2572	2413	4993	0.000749903	3.93171e-07	9.71094	9.44238	0.0994254	1.02844	9.1058	3.35966	19.1533	20.0831
2021-06-15	6-115	N6	0.4934	0.2073	0.0321	0.0128	1.2	2537	2369	4991	0.00238113	1.10884e-06	13.7174	11.3366	0.131542	1.21001	10.0331	3.84543	25.054	22.1583
2021-06-15	6-116	N6	0.4913	0.2082	0.0426	0.0149	1.6	2537	2417	4990	0.00065363	1.77946e-07	12.0122	12.1471	0.0805403	0.988895	9.98675	3.7971	24.1593	22.0695
2021-06-15	6-117	N6	0.2645	0.1148	0.0205	0.0076	1.1	2607	2381	4987	0.00135405	6.59578e-07	6.608	7.6393	0.152136	0.865001	8.05407	2.87136	14.2473	17.6498
2021-06-15	6-118	N6	0.3576	0.1544	0.041	0.0174	1.7	2519	2379	4982	0.00091731	1.69493e-07	9.29559	8.52048	0.0680313	1.09097	8.07867	3.23681	17.8161	18.4216
2021-06-15	6-119	N6	0.4935	0.2034	0.0349	0.0126	1.6	2542	2431	4975	0.000648246	1.41205e-07	12.762	12.3858	0.0405481	1.03037	9.87774	3.88343	25.1479	21.9509
2021-06-15	6-120	N6	0.4521	0.1848	0.0432	0.014	1.7	2494	2393	4987	0.0021984	8.72802e-07	10.9098	13.0867	0.138996	0.833653	9.94931	3.62286	23.9965	21.8825
2021-06-15	6-121	N6	0.6616	0.31	0.0562	0.0247	1.7	2586	2382	4983	0.000349168	6.45658e-08	13.4346	13.3432	0.0308582	1.00685	10.2866	4.04295	26.7778	23.0713
2021-06-15	6-123	N6	0.5861	0.2501	0.0461	0.0168	1.7	2507	2428	4994	0.00225492	1.17321e-06	14.2875	16.5319	0.0830247	0.864241	10.8057	4.33854	30.8194	24.0677
2021-06-15	6-124	N6	0.7805	0.3124	0.041	0.0134	1.3	2492	2393	4992	0.000806355	4.82137e-07	15.9388	16.6209	0.0351883	0.958964	11.0994	4.64701	32.5597	25.2738
2021-06-15	6-125	N6	0.5076	0.2194	0.0498	0.019	2	2465	2422	4985	0.000979788	5.27447e-07	12.5743	13.2157	0.0599009	0.951461	10.0062	3.93335	25.79	22.1938
2021-06-15	6-126	N6	0.4525	0.1929	0.0304	0.0135	1.3	2399	2381	4967	0.000539684	1.13039e-07	10.9034	10.788	0.046999	1.0107	9.46147	3.36247	21.6915	20.8568
2021-06-15	6-127	N6	0.5879	0.2558	0.0425	0.015	1.6	2503	2458	4990	0.00159716	5.37248e-07	12.391	13.9797	0.0802963	0.886357	11.0494	3.86328	26.3708	24.326
2021-06-15	6-128	N6	0.3351	0.1466	0.0235	0.0075	1.4	2453	2395	4989	0.000362995	3.83304e-08	8.31589	8.51666	0.0337701	0.976425	8.67513	3.01562	16.8326	18.842
2021-06-15	6-129	N6	0.5462	0.2248	0.036	0.0136	1.4	2520	2337	4995	0.00110444	4.19139e-07	12.3902	13.4004	0.0741455	0.924613	10.225	4.00316	25.7905	22.902
2021-06-15	6-130	N6	0.4226	0.1791	0.0367	0.0123	1.6	2511	2433	4990	0.00047352	8.21475e-08	12.0965	11.657	0.0404967	1.0377	9.71904	3.76071	23.7535	21.4404
2021-06-15	6-131	N6	0.3648	0.1594	0.0338	0.0114	1.6	2517	2460	4982	0.00105211	4.99631e-07	9.25462	10.2465	0.0871043	0.903197	9.22778	3.33547	19.5011	20.1323
2021-06-15	6-132	N6	0.381	0.1518	0.0288	0.0102	1.2	2510	2417	4984	0.00125889	5.89553e-07	8.92109	10.1766	0.0882573	0.876625	9.01248	3.06015	19.0977	19.91
2021-06-15	6-133	N6	0.2631	0.1145	0.0236	0.0091	1.4	2514	2373	4964	0.000695506	2.93802e-07	7.18231	7.49067	0.0936315	0.958834	7.94089	2.88048	14.673	17.3795
2021-06-15	6-134	N6	0.5365	0.2223	0.0308	0.0083	1.1	2587	2328	4946	0.00191575	1.08918e-06	12.1528	10.4508	0.104471	1.16286	10.3936	3.70412	22.6037	22.8178
2021-06-15	6-135	N6	0.3488	0.1556	0.0243	0.0103	1.3	2504	2405	4980	0.000741886	1.24612e-07	8.98315	9.71722	0.0750965	0.924456	8.6693	3.39891	18.7004	19.1649
2021-06-15	6-136	N6	0.9377	0.3702	0.0534	0.0201	1.6	2577	2365	4975	0.00160205	6.37954e-07	19.9589	18.3898	0.0583559	1.08532	11.8397	4.83888	38.3487	27.064
2021-06-15	6-137	N6	0.9055	0.38	0.0515	0.0185	1.5	2537	2280	4978	0.00243093	2.00403e-06	19.3285	17.2931	0.10625	1.1177	11.7495	4.9166	36.6217	26.8082
2021-06-15	6-138	N6	0.3881	0.1592	0.0366	0.0133	1.7	2429	2451	4987	0.000664652	2.49628e-07	10.0867	10.5495	0.0451814	0.956137	9.3177	3.3513	20.6362	20.4452
2021-06-15	6-139	N6	0.3162	0.1232	0.0205	0.0088	1.2	2521	2435	4990	0.00160287	6.56847e-07	8.09955	6.52331	0.126953	1.24163	8.21284	2.85044	14.6229	17.7405
2021-06-15	6-140	N6	0.2935	0.1374	0.0226	0.0081	1.1	2384	2349	4784	0.000468527	8.13837e-08	7.62097	7.16278	0.0581939	1.06397	7.61446	2.88774	14.7837	16.8459
2021-06-15	6-141	N6	0.2817	0.1337	0.0246	0.0095	1.1	2355	2261	4872	0.000383864	4.3144e-08	6.8157	7.07053	0.0475728	0.963959	7.84446	2.77555	13.8862	17.1247
2021-06-15	6-142	N6	0.4122	0.1856	0.0345	0.0109	1.6	2513	2444	4984	0.00103432	3.78031e-07	9.27142	10.264	0.0776757	0.903296	9.09896	3.36534	19.5354	19.9363
2021-06-15	6-143	N6	0.3915	0.1626	0.0248	0.0148	1.1	2470	2385	4878	0.00170934	4.07482e-07	6.40552	8.11469	0.180998	0.789374	7.65113	3.22232	14.5202	17.2116
2021-06-15	6-144	N6	0.4899	0.209	0.0349	0.0165	1.3	2469	2342	4979	0.00308314	1.67975e-06	8.45535	11.4687	0.212425	0.737255	9.74619	3.58411	19.9241	21.4514
2021-06-15	6-145	N6	0.3034	0.1278	0.0301	0.0099	1.6	2481	2228	4785	0.00170478	4.59003e-07	8.11135	6.4519	0.145663	1.2572	7.24996	2.95562	14.5632	16.4907
2021-06-15	6-146	N6	0.2624	0.1178	0.0233	0.0109	1.1	2449	2259	4881	0.00091396	2.3267e-07	6.99862	6.13657	0.0859822	1.14048	7.75777	2.86541	13.1352	16.9173
2021-06-15	6-147	N6	0.642	0.2698	0.0607	0.0273	2.2	2530	2439	4988	0.00145578	3.66303e-07	14.4793	13.0402	0.0777748	1.11036	10.6294	4.04212	27.5196	23.7479
2021-06-15	6-148	N6	0.6113	0.2445	0.0315	0.0141	1.1	2530	2439	4988	0.00145578	3.66303e-07	14.4793	13.0402	0.0777748	1.11036	10.6294	4.04212	27.5196	23.7479
2021-06-15	6-149	N6	0.5394	0.2216	0.0406	0.0146	1.6	2515	2386	4989	0.00110627	3.0198e-07	12.6724	13.5593	0.0641017	0.934591	10.0184	3.94332	26.2318	22.4025
2021-06-15	6-150	N6	0.6149	0.2661	0.0474	0.0191	1.6	2567	2405	4989	0.00148493	3.94735e-07	13.537	12.0535	0.0786951	1.12308	10.1323	3.88649	25.5904	22.5659
2021-06-15	6-151	N6	0.673	0.2905	0.0481	0.0199	1.4	2546	2427	4986	0.00155099	5.09061e-07	13.1513	14.6848	0.0730483	0.895569	10.5811	4.00918	27.8361	23.5126
2021-06-15	6-152	N6	0.4869	0.2165	0.0303	0.0116	1.3	2516	2466	4988	0.00240903	7.00661e-07	10.3155	12.724	0.143664	0.810711	9.63816	3.65468	23.0396	21.2972
2021-06-15	6-153	N6	0.407	0.1751	0.0353	0.0145	1.6	2595	2397	4996	0.000299878	2.59922e-08	9.83852	10.1084	0.022646	0.9733	9.07113	3.31298	19.9469	20.0433
2021-06-15	6-154	N6	0.4711	0.2071	0.0413	0.0134	1.9	2539	2358	5040	0.000875256	1.31012e-07	11.2737	11.0668	0.0819531	1.01869	9.35378	3.63199	22.3405	20.8441
2021-06-15	6-155	N6	0.4779	0.2141	0.0372	0.0171	1.6	2526	2445	4987	0.00253404	1.14859e-06	9.97168	12.4215	0.154068	0.802779	9.6649	3.57801	22.3931	21.2354
2021-06-15	6-156	N6	0.4707	0.1922	0.028	0.0075	1.2	2485	2346	4976	0.000600724	1.16891e-07	10.1302	9.9758	0.0508749	1.01547	7.89269	3.76678	20.106	18.7275
2021-06-15	6-157	N6	0.7797	0.3153	0.0425	0.0188	1.3	2552	2434	4991	0.00114827	4.07522e-07	17.5542	16.7413	0.0523306	1.04856	11.2221	4.68594	34.2954	25.5645
2021-06-15	6-158	N6	0.7395	0.3024	0.0359	0.0125	1.2	2553	2423	4989	0.00154818	1.16882e-06	16.0121	17.4845	0.06149	0.915788	11.0662	4.60205	33.4965	25.2048
2021-06-15	6-159	N6	0.5961	0.2682	0.036	0.0117	1.2	2478	2343	4984	0.00104856	1.64842e-07	11.8244	12.8579	0.0776557	0.919622	9.5961	4.00608	24.6822	21.6171
2021-06-15	6-160	N6	0.3439	0.1533	0.0265	0.0135	1.5	2530	2428	4994	0.000470449	1.09452e-07	8.45151	8.36997	0.0491314	1.00974	8.5302	3.05996	16.8215	18.6488
2021-06-15	6-161	N6	0.2927	0.1292	0.0265	0.0132	1.4	2486	2263	4966	0.00260783	1.5464e-06	4.88657	7.47149	0.273628	0.654029	7.81962	2.74931	12.3581	17.1243
2021-06-15	6-162	N6	0.3085	0.1297	0.0272	0.0102	1.4	2530	2453	4985	0.000622869	1.24543e-07	8.06516	7.4969	0.062376	1.0758	8.32726	3.00037	15.5621	18.1824
2021-06-15	6-163	N6	0.5137	0.2169	0.0462	0.0157	1.7	2477	2329	4984	0.00247594	1.75045e-06	13.6272	11.1611	0.110322	1.22095	9.9493	3.67676	24.7883	22.134
2021-06-15	6-164	N6	0.5387	0.2269	0.0448	0.0162	1.4	2636	2351	4997	0.000888353	1.62428e-07	11.8661	11.2322	0.0831718	1.05644	9.57213	4.07803	23.0983	21.7621
2021-06-15	6-165	N6	0.575	0.2439	0.0466	0.0194	1.6	2516	2416	4975	0.000886253	2.35312e-07	13.3683	14.071	0.0609486	0.95006	10.0211	4.07932	27.4393	22.5316
2021-06-15	6-166	N6	0.5166	0.2258	0.0415	0.0155	1.6	2527	2419	4974	0.000748881	1.78492e-07	12.1034	11.3565	0.0409898	1.06576	9.83305	3.70089	23.4599	21.6646
2021-06-15	6-167	N6	0.5133	0.2314	0.037	0.0147	1.4	2472	2321	4941	0.00205899	1.01041e-06	12.7363	10.7202	0.108567	1.18806	9.7585	3.77114	23.4565	21.742
2021-06-15	6-169	N6	0.5052	0.2148	0.0266	0.0119	1.1	2522	2370	4981	0.000693051	1.41347e-07	11.9607	11.8104	0.0635097	1.01273	9.52253	3.90195	23.771	21.4467
2021-06-15	6-170	N6	0.9024	0.372	0.0643	0.0243	1.6	2467	2479	4981	0.00138766	9.17058e-07	17.3583	18.7214	0.0786178	0.927189	12.2158	4.79349	36.0797	27.6783
2021-06-15	6-171	N6	0.6986	0.301	0.0427	0.0184	1.6	2453	2518	4975	0.00150231	5.48737e-07	14.1987	12.8138	0.0800709	1.10808	10.4681	4.14723	27.0125	23.9725
2021-06-15	6-172	N6	0.7547	0.308	0.0583	0.0202	1.6	2532	2344	4982	0.00151682	7.98622e-07	16.5861	17.1361	0.076068	0.967906	11.3146	4.74868	33.7222	25.7045
2021-06-15	6-173	N6	0.9262	0.3824	0.0674	0.0251	1.7	2594	2374	4989	0.00637728	6.05762e-06	22.2559	16.0482	0.230888	1.38682	11.9371	5.16506	38.3041	27.7138
2021-06-15	6-174	N6	0.5478	0.2181	0.0524	0.0181	1.9	2527	2311	5001	0.00113707	5.64829e-07	12.6768	11.6196	0.0577165	1.09098	9.3748	3.95545	24.2964	21.8687
2021-06-15	6-175	N6	0.5805	0.2536	0.0464	0.016	1.7	2511	2425	4988	0.00211373	8.57551e-07	11.5836	13.6135	0.121841	0.850892	9.84209	4.00238	25.197	22.1757
2021-06-15	6-176	N6	0.4983	0.2139	0.0366	0.0134	1.5	2432	2339	4992	0.000827394	6.78215e-07	9.96704	10.7113	0.0549162	0.930516	9.45531	3.71869	20.6783	21.1392
2021-06-15	6-177	N6	0.3422	0.1357	0.0351	0.0127	1.8	2443	2327	4987	0.000810354	2.85742e-07	7.37937	8.15559	0.103226	0.904824	7.59903	3.13485	15.535	17.2647
2021-06-15	6-178	N6	0.6217	0.2651	0.0458	0.0174	1.6	2549	2442	4993	0.00239746	8.43466e-07	11.3291	13.7005	0.172727	0.826907	10.3165	3.97323	25.0296	23.0325
2021-06-15	6-179	N6	0.7105	0.2945	0.0571	0.0225	2	2568	2402	4976	0.00165826	5.7437e-07	15.0746	14.633	0.0855989	1.03018	11.0189	4.20406	29.7076	24.6184
2021-06-15	6-180	N6	0.7052	0.2976	0.0545	0.0229	2	2568	2402	4976	0.00165826	5.7437e-07	15.0746	14.633	0.0855989	1.03018	11.0189	4.20406	29.7076	24.6184
2021-06-15	6-181	N6	0.3695	0.157	0.0356	0.0126	1.8	2560	2372	5010	0.000330455	3.7498e-08	9.429	9.38756	0.0421527	1.00441	8.74579	3.24268	18.8166	19.3359
2021-06-15	6-182	N6	0.596	0.2465	0.0536	0.0201	1.7	2588	2375	4972	0.00261319	1.39869e-06	13.0411	10.557	0.137059	1.2353	9.84461	3.94767	23.5981	22.2073
2021-06-15	6-183	N6	0.4651	0.2005	0.033	0.0142	1.4	2608	2371	4992	0.00107821	3.29243e-07	10.0977	9.25389	0.104848	1.09118	9.68286	3.52402	19.3516	21.3443
2021-06-15	6-184	N6	0.5304	0.2295	0.0289	0.0108	1	2472	2468	4975	0.00196528	4.75905e-07	10.8576	12.8181	0.137596	0.847051	9.63497	3.73625	23.6757	21.4544
2021-06-15	6-185	N6	0.3834	0.1757	0.0257	0.0105	1.2	2541	2401	4980	0.000543217	1.61591e-07	9.87765	9.55948	0.0545329	1.03328	8.8575	3.45565	19.4371	19.6805
2021-06-15	6-186	N6	0.6589	0.2786	0.0465	0.0141	1.6	2511	2271	4961	0.000996018	4.74345e-07	13.25	14.0637	0.0594793	0.942144	10.3595	4.2157	27.3138	23.8032
2021-06-15	6-187	N6	0.6662	0.2897	0.0555	0.018	1.7	2620	2335	4965	0.00101474	5.98794e-07	13.1028	12.5027	0.0736062	1.048	10.4659	3.97679	25.6055	23.3479
2021-06-15	6-188	N6	0.7522	0.3269	0.0413	0.0161	1.3	2598	2378	4989	0.00218384	5.33113e-07	15.6821	13.512	0.097717	1.1606	10.1565	4.1825	29.1942	23.3396
2021-06-15	6-189	N6	0.4466	0.1934	0.0316	0.0122	1.4	2513	2347	4983	0.000893413	3.30095e-07	11.3895	11.7566	0.0679111	0.968776	10.3064	3.48244	23.1461	22.3435
2021-06-15	6-190	N6	0.9619	0.4198	0.0596	0.0246	1.5	2535	2443	5008	0.00327954	1.70276e-06	16.1768	19.2972	0.135372	0.838297	12.0521	4.67111	35.4739	27.1542
2021-06-15	6-191	N6	0.4109	0.1679	0.0256	0.0064	1.2	2575	2337	4980	0.00251461	1.37832e-06	10.8433	8.32888	0.175144	1.30189	9.54509	3.16644	19.1722	20.9418
2021-06-15	6-192	N6	0.4977	0.2074	0.0398	0.0158	1.8	2640	2319	4962	0.000803335	3.30122e-07	10.8284	10.1905	0.0476507	1.0626	8.64281	3.68035	21.0189	19.8988
2021-06-15	6-193	N6	0.9082	0.3938	0.0529	0.0192	1.5	2529	2369	4971	0.00324002	3.91736e-06	16.0203	19.2599	0.134155	0.831797	11.4299	4.74043	35.2802	26.2254
2021-06-15	6-194	N6	0.583	0.2658	0.0475	0.0204	1.7	2539	2335	4978	0.00188353	4.33167e-07	13.8339	11.9506	0.107878	1.15759	10.5674	3.80534	25.7846	23.1593
2021-06-15	6-195	N6	0.5983	0.2493	0.0456	0.0152	1.7	2601	2373	4983	0.000655822	2.08633e-07	12.199	12.3496	0.056342	0.987803	9.65725	3.83586	24.5485	21.9814
2021-06-15	6-196	N6	0.3621	0.1596	0.0324	0.0121	1.4	2637	2325	4983	0.000687034	1.73016e-07	7.57924	7.07709	0.0743564	1.07096	8.26065	3.14433	14.6563	18.2124
2021-06-15	6-197	N6	0.6627	0.2848	0.0521	0.0194	1.8	2618	2297	4973	0.000595518	2.64283e-07	13.0662	13.299	0.0684277	0.982494	10.1739	4.09595	26.3653	23.1389
2021-06-15	6-198	N6	0.6134	0.2594	0.0584	0.0209	1.9	2548	2369	4994	0.000639877	2.35338e-07	12.4969	12.8416	0.0343428	0.973155	9.77917	4.06615	25.3384	22.455
2021-06-15	6-199	N6	1.0213	0.4596	0.0509	0.0202	1.1	2514	2358	4990	0.001391	6.99303e-07	19.4543	19.1346	0.0543285	1.01671	11.1932	5.2315	38.5889	26.4593
2021-06-15	6-200	N6	0.5918	0.2577	0.0452	0.0176	1.6	2527	2327	4986	0.000594886	1.52779e-07	11.724	11.8094	0.0527262	0.992772	9.76083	3.86853	23.5333	22.024
2021-06-15	6-201	N6	0.5282	0.2201	0.0296	0.0105	1.1	2525	2406	4974	0.000942816	4.10169e-07	11.586	11.5024	0.0758484	1.00726	9.37056	3.69856	23.0884	21.4529
2021-06-15	6-203	N6	0.4874	0.2547	0.0442	0.0174	1.6	2558	2399	4971	0.00104462	3.69186e-07	11.8296	11.2479	0.0821182	1.05171	10.1742	3.59906	23.0775	22.3632
2021-06-15	6-204	N6	0.3842	0.1638	0.0215	0.0089	1	2601	2300	4993	0.00298268	2.05517e-06	10.5114	7.5446	0.196255	1.39324	8.50025	3.41332	18.056	19.2509
2021-06-15	6-205	N6	0.4334	0.1894	0.0287	0.0133	1.2	2507	2332	4994	0.00160427	4.08782e-07	7.59728	9.20137	0.144112	0.825669	9.29997	3.17392	16.7987	20.3743
2021-06-15	6-206	N6	0.4128	0.1887	0.0316	0.0126	1.5	2474	2403	4982	0.000566355	8.34212e-08	10.4123	10.7371	0.0532839	0.969749	9.57055	3.58154	21.1495	20.9462
2021-06-15	6-207	N6	0.6216	0.2715	0.0514	0.0202	1.6	2503	2467	4986	0.00168312	7.07663e-07	12.66	14.1785	0.102826	0.8929	10.5473	3.84019	26.8385	23.2159
2021-06-15	6-208	N6	0.4853	0.2223	0.0302	0.014	1.2	2506	2320	4997	0.000787059	1.8583e-07	11.4312	10.9199	0.0818757	1.04682	9.53374	3.59627	22.3511	21.0376
2021-06-15	6-209	N6	0.4144	0.1775	0.0241	0.0091	0.9	2472	2426	4974	0.000657136	2.06513e-07	9.89259	10.5341	0.0653814	0.939103	9.79974	3.30258	20.4267	21.2207
2021-06-15	6-210	N6	0.4975	0.2065	0.0345	0.0131	1.1	2555	2407	4974	0.00209369	1.13291e-06	11.3087	13.3754	0.101345	0.845483	9.88372	3.85052	24.6841	22.0573
2021-06-15	6-211	N6	0.5276	0.2213	0.0238	0.012	0.9	2498	2471	4997	0.00043531	1.60457e-07	13.1563	12.903	0.0387921	1.01963	10.4499	3.76438	26.0593	22.9382
2021-06-15	6-212	N6	0.4747	0.2032	0.0286	0.0115	1.3	2439	2487	4990	0.000505477	1.02723e-07	11.8198	12.1933	0.0502517	0.969375	9.84223	3.64715	24.0131	21.7564
2021-06-15	6-213	N6	0.4311	0.1908	0.0213	0.0086	0.8	2485	2340	4994	0.00144519	4.28254e-07	9.18362	10.618	0.105212	0.864906	8.92067	3.36871	19.8017	19.9551
2021-06-15	6-214	N6	0.4647	0.193	0.0316	0.008	1.4	2465	2314	4987	0.00296978	2.16316e-06	9.59232	12.4206	0.190443	0.772293	9.60223	3.40752	22.0129	21.343
2021-06-15	6-215	N6	0.7296	0.3289	0.0446	0.018	1.3	2429	2370	4992	0.000851318	2.16499e-07	14.6315	15.0382	0.0532405	0.972952	9.90741	4.61091	29.6697	22.7867
2021-06-15	6-217	N6	0.943	0.4048	0.0534	0.0215	1.3	2511	2462	4987	0.00553906	4.90594e-06	17.9933	23.501	0.143378	0.76564	12.4042	4.94156	41.4943	27.8264
2021-06-15	6-218	N6	0.833	0.3486	0.0575	0.0206	1.6	2519	2452	4995	0.0020462	2.6766e-06	19.1596	20.6554	0.0843939	0.927582	12.6909	4.68741	39.815	27.9669
2021-06-15	6-219	N6	0.6079	0.2525	0.0432	0.0186	1.4	2436	2336	4971	0.000476859	1.38133e-07	14.9389	15.0241	0.0303653	0.994326	10.7476	4.31482	29.963	23.9046
2021-06-15	6-220	N6	0.5	0.2069	0.0277	0.0113	1	2548	2422	4985	0.00102857	2.01605e-07	12.1965	13.2249	0.0804699	0.922238	10.1953	3.80271	25.4214	22.5814
2021-06-15	6-221	N6	0.4042	0.1631	0.0264	0.008	1.2	2416	2412	4896	0.000982069	5.2938e-07	9.82335	10.7875	0.0796641	0.910627	9.12353	3.34118	20.6108	20.1305
2021-06-15	6-223	N6	0.5839	0.2682	0.0304	0.0128	1	2592	2388	4993	0.0028951	1.27981e-06	12.8	9.90505	0.140977	1.29227	9.00623	3.90429	22.705	20.4496
2021-06-15	6-224	N6	0.4703	0.2105	0.0288	0.0127	1.2	2450	2403	4965	0.00217717	6.87659e-07	8.96146	11.1063	0.155821	0.806882	8.70688	3.46094	20.0678	19.6037
2021-06-15	6-225	N6	0.6106	0.2679	0.0293	0.014	0.9	2483	2378	4990	0.000832364	5.70007e-07	13.9839	13.422	0.050822	1.04187	10.7357	4.06358	27.406	23.7959
2021-06-15	6-226	N6	0.6714	0.2977	0.0456	0.0205	1.5	2553	2388	4988	0.00218087	2.18361e-06	13.5448	15.6667	0.075477	0.864563	10.6927	4.19208	29.2115	23.73
2021-06-15	6-227	N6	0.6403	0.2871	0.0512	0.019	1.8	2498	2495	4991	0.000556927	1.8446e-07	13.6449	13.9754	0.0254847	0.976355	10.5608	3.81171	27.6203	23.3339
2021-06-15	6-228	N6	0.7333	0.3014	0.058	0.0262	2	2407	2488	4992	0.00112793	7.42283e-07	18.4733	17.4807	0.0392999	1.05678	12.4614	4.31452	35.9539	27.3967
2021-06-15	6-229	N6	0.6526	0.2755	0.0416	0.0179	1.5	2541	2425	4987	0.00120433	3.83488e-07	15.4001	16.5907	0.0689652	0.92824	11.1842	4.37318	31.9908	24.9078
2021-06-15	6-230	N6	0.5572	0.2441	0.0475	0.0168	1.5	2489	2442	4976	0.00092276	2.55311e-07	12.5121	12.1321	0.0754527	1.03131	10.4158	3.64152	24.6442	22.704
2021-06-15	6-231	N6	0.5624	0.2415	0.0562	0.0235	2	2487	2360	4991	0.00190088	6.82171e-07	13.847	11.9482	0.0828491	1.15892	10.3539	3.82252	25.7952	22.7802
2021-06-15	6-232	N6	0.6252	0.2774	0.0417	0.0178	1.4	2497	2421	4988	0.000438825	1.19666e-07	14.1275	14.0369	0.0242569	1.00646	10.6057	4.08437	28.1645	23.4275
2021-06-15	6-233	N6	0.5072	0.2211	0.0278	0.0115	1	2391	2333	4981	0.000839316	4.69054e-07	11.3182	12.0972	0.0763269	0.935605	9.77906	3.8117	23.4153	21.6937
2021-06-15	6-234	N6	0.4686	0.201	0.0241	0.0123	1	2650	2312	4984	0.000647528	2.01883e-07	10.2362	9.69207	0.0536648	1.05614	8.86276	3.54167	19.9283	19.8205
2021-06-15	6-235	N6	0.8217	0.3503	0.0414	0.0168	1.2	2561	2416	4994	0.00329728	3.14037e-06	17.7561	20.9873	0.11484	0.846039	12.3188	4.71313	38.7433	27.675
2021-06-15	6-236	N6	0.6519	0.2662	0.0418	0.015	1.3	2617	2353	4996	0.00676779	1.07065e-05	19.7954	13.0369	0.222936	1.51841	11.4197	4.47622	32.8323	25.4657
2021-06-15	6-237	N6	0.7496	0.3199	0.0329	0.0149	1	2540	2366	4982	0.0034316	5.92199e-06	15.8721	19.1788	0.152771	0.827589	11.6018	4.61632	35.0509	26.075
2021-06-15	6-238	N6	0.472	0.1961	0.0268	0.0104	1	2586	2326	4989	0.000556052	1.62376e-07	10.1563	10.5489	0.0551845	0.962786	9.01149	3.57603	20.7052	20.2061
2021-06-15	6-239	N6	0.7929	0.359	0.0398	0.0168	1.1	2486	2392	4991	0.00135986	3.72765e-07	15.9011	17.1356	0.0612156	0.927958	10.6398	4.55178	33.0367	24.3367
2021-06-15	6-240	N6	0.5855	0.2526	0.0364	0.0157	1.4	2525	2450	4997	0.000548131	1.79485e-07	14.5788	14.1337	0.0398364	1.0315	10.9123	3.91308	28.7125	24.0983
2021-06-15	6-241	N6	0.5155	0.2397	0.0343	0.0151	1.4	2579	2404	4990	0.000741759	1.4906e-07	9.8461	10.5804	0.083027	0.930598	9.29983	3.38335	20.4265	20.504
2021-06-15	6-242	N6	0.4086	0.1816	0.0349	0.0102	1.6	2488	2425	4986	0.00054873	1.39808e-07	8.82327	9.35042	0.0501917	0.943623	8.4619	3.2069	18.1737	18.7309
2021-06-15	6-243	N6	0.5604	0.2694	0.0279	0.0099	0.8	2540	2409	4983	0.00253423	7.00825e-07	10.3582	12.8904	0.161543	0.803561	9.2397	4.04219	23.2487	21.0216
2021-06-15	6-244	N6	0.901	0.4025	0.0452	0.0213	1.2	2558	2400	4986	0.000759456	3.19377e-07	18.3015	17.6228	0.0344595	1.03851	11.4029	4.71154	35.9244	25.6604
2021-06-15	6-245	N6	0.4432	0.1918	0.0308	0.0139	1.5	2527	2442	4991	0.000863845	1.17259e-07	9.66912	10.3429	0.0645666	0.934853	9.17165	3.44344	20.0121	20.1736
2021-06-15	6-246	N6	0.5768	0.2476	0.046	0.0175	1.7	2511	2460	4987	0.00124745	5.75554e-07	13.5436	12.3668	0.0562153	1.09516	10.2187	4.01549	25.9104	22.5775
2021-06-15	6-247	N6	0.3848	0.1848	0.0243	0.0126	1	2534	2401	4980	0.000890584	2.35429e-07	8.6925	7.87215	0.0763974	1.10421	8.44374	3.30088	16.5647	18.6146
2021-06-15	6-248	N6	0.708	0.3226	0.0404	0.0204	1.3	2461	2447	4967	0.00245374	5.95394e-07	13.1788	15.6322	0.130024	0.843054	10.0955	4.26017	28.811	22.8159
2021-06-15	6-249	N6	0.4702	0.2102	0.0257	0.0135	0.9	2550	2387	4987	0.000928067	3.6207e-07	10.0414	9.13858	0.0514288	1.0988	8.5276	3.65909	19.18	19.2389
2021-06-15	6-250	N6	0.7109	0.3289	0.0555	0.0225	1.8	2514	2388	4985	0.0016822	6.37174e-07	14.0786	15.5864	0.0912852	0.903259	11.1003	4.00663	29.665	24.4312
2021-06-15	6-251	N6	0.6246	0.2708	0.0302	0.0118	1.1	2547	2430	4983	0.00187075	8.49957e-07	12.3589	14.2278	0.0920887	0.868642	10.3087	3.91924	26.5867	22.8669
2021-06-15	6-252	N6	0.5003	0.219	0.0257	0.0109	0.9	2576	2381	4970	0.00068577	1.32887e-07	10.7085	10.8639	0.0557086	0.985702	9.32105	3.65	21.5724	20.691
2021-06-15	6-253	N6	0.8046	0.3472	0.0617	0.0246	1.9	2512	2441	4988	0.00190061	2.50113e-06	17.7452	15.8945	0.0563394	1.11644	12.0901	4.21269	33.6397	26.2848
2021-06-15	6-254	N6	0.7016	0.324	0.0493	0.0196	1.5	2563	2387	4979	0.0016336	4.74056e-07	15.7618	14.2479	0.0742752	1.10625	11.1648	4.09593	30.0096	24.4962
2021-06-15	6-255	N6	0.6689	0.2994	0.0481	0.0205	1.6	2392	2371	4987	0.0031549	2.70057e-06	11.8921	14.9497	0.166608	0.795473	10.5302	4.0659	26.8418	23.2183
2021-06-15	6-256	N6	0.5744	0.2575	0.0455	0.0181	1.6	2491	2444	4983	0.000284023	5.50886e-08	13.151	13.0242	0.019665	1.00974	10.1631	3.97072	26.1753	22.498
2021-06-15	6-257	N6	0.6737	0.3044	0.0377	0.0155	1.1	2484	2355	4986	0.00256901	7.15048e-07	14.9108	12.3418	0.123899	1.20816	10.6502	3.79962	27.2526	23.4388
2021-06-15	6-258	N6	0.5504	0.2471	0.0355	0.0155	1.4	2505	2418	4961	0.0014425	4.53548e-07	10.4927	11.9298	0.100952	0.879533	9.33745	3.57286	22.4225	20.8109
2021-06-15	6-259	N6	0.5194	0.2287	0.037	0.0147	1.3	2560	2408	4988	0.000938232	5.67021e-07	13.0825	12.3265	0.050887	1.06134	10.3178	3.79369	25.409	22.7832
2021-06-15	6-260	N6	0.675	0.3175	0.0388	0.0166	1.3	2468	2341	4969	0.00225691	7.02939e-07	12.1401	14.3958	0.115715	0.843311	10.639	3.87647	26.5359	23.3707
2021-06-15	6-261	N6	0.8647	0.3957	0.0354	0.0158	1	2409	2524	4981	0.00128015	7.23046e-07	16.4568	17.5788	0.0613005	0.936178	10.9603	4.63534	34.0356	25.0026
2021-06-15	6-262	N6	0.5058	0.2227	0.0351	0.0124	1.6	2336	2429	4989	0.000435318	9.73229e-08	10.9941	10.8219	0.0495659	1.01591	9.49549	3.54558	21.816	20.9299
2021-06-15	6-263	N6	0.5013	0.2141	0.0368	0.0154	1.6	2491	2380	4975	0.00211481	1.00734e-06	13.0157	10.9022	0.099002	1.19387	9.73223	3.66542	23.9179	21.5845
2021-06-15	6-264	N6	0.4823	0.2018	0.0382	0.0139	1.5	2506	2432	4968	0.00162305	1.45701e-06	12.4415	10.9899	0.0938364	1.13208	9.47259	3.67769	23.4313	21.2406
2021-06-15	6-265	N6	0.7792	0.3577	0.0517	0.0211	1.6	2510	2405	4990	0.00279546	2.29648e-07	20.1362	17.3408	0.126766	1.16121	11.9554	4.54208	37.477	26.6918
2021-06-15	6-266	N6	0.4579	0.2064	0.033	0.0146	1.6	2539	2425	4990	0.000522145	1.53093e-07	10.1193	9.69697	0.0442856	1.04355	9.11748	3.35665	19.8162	20.0718
2021-06-15	6-267	N6	0.8735	0.408	0.0556	0.0246	1.5	2534	2392	4989	0.000552747	1.15972e-07	16.6642	16.8011	0.0393002	0.991852	11.2803	4.53688	33.4653	25.1708
2021-06-15	6-268	N6	0.6766	0.3113	0.042	0.0176	1.4	2449	2362	4988	0.00073549	2.0869e-07	14.7478	14.3249	0.0473474	1.02952	10.0932	4.30184	29.0726	22.8339
2021-06-15	6-269	N6	0.607	0.2741	0.0413	0.0178	1.4	2451	2509	4987	0.00127803	6.99525e-07	11.9128	13.1477	0.0671616	0.906077	9.76999	3.84462	25.0606	21.8165
2021-06-15	6-270	N6	0.6673	0.3079	0.0418	0.0181	1.5	2522	2436	4974	0.00179716	2.5329e-07	11.7719	13.569	0.114822	0.867554	10.0546	3.89257	25.3409	22.3501
2021-06-15	6-271	N6	0.4621	0.2036	0.0366	0.0148	1.4	2560	2395	4986	0.000588199	5.40579e-08	10.5722	10.0394	0.0481249	1.05307	9.42657	3.38382	20.6116	20.6181
2021-06-15	6-272	N6	0.7928	0.37	0.044	0.0192	1.3	2544	2380	4984	0.000469279	1.35482e-07	15.7605	15.5875	0.0243524	1.0111	11.0635	4.23388	31.3479	24.673
2021-06-15	6-273	N6	0.7109	0.3185	0.0524	0.0199	1.8	2499	2403	4980	0.0018026	2.46672e-06	15.0234	16.3598	0.142102	0.91831	11.2765	4.21008	31.3832	24.9151
2021-06-15	6-274	N6	0.3836	0.1699	0.0276	0.0121	1.4	2563	2382	4993	0.00157144	7.87315e-07	10.0813	8.56084	0.100028	1.17761	8.74572	3.29048	18.6422	19.3082
2021-06-15	6-275	N6	0.413	0.1947	0.0289	0.013	1.2	2413	2358	4980	0.000872641	1.77906e-07	7.78988	8.65958	0.0854127	0.899568	8.50459	3.17125	16.4495	18.7598
2021-06-15	6-276	N6	0.6206	0.2888	0.0431	0.0194	1.5	2537	2442	4988	0.000695296	1.88778e-07	11.7226	12.0267	0.0736665	0.974709	9.55144	3.68592	23.7493	21.2776
2021-06-15	6-277	N6	0.5954	0.2647	0.032	0.0135	1.1	2496	2483	4987	0.000584686	1.66613e-07	13.5339	13.6784	0.0453004	0.989433	10.4748	4.0995	27.2123	23.147
2021-06-15	6-278	N6	0.4105	0.1875	0.0325	0.0128	1.5	2530	2400	4980	0.000376343	6.02889e-08	9.97365	10.1466	0.0320522	0.982952	8.8445	3.61563	20.1203	19.703
2021-06-15	6-279	N6	0.6146	0.267	0.0341	0.0147	1.1	2525	2447	4984	0.000740805	4.96655e-07	12.6926	13.2551	0.0490824	0.957563	10.0484	3.94038	25.9477	22.4476
2021-06-15	6-280	N6	0.4337	0.2001	0.0246	0.0106	1	2538	2421	4975	0.00318671	1.1331e-06	7.49835	10.6851	0.234792	0.70176	8.69237	3.39103	18.1834	19.4023
2021-06-15	6-281	N6	0.3246	0.1502	0.0268	0.012	1.3	2533	2379	4966	0.000710986	1.97321e-07	7.9796	7.28185	0.0534024	1.09582	8.03018	3.21871	15.2615	17.7584
2021-06-15	6-282	N6	0.4884	0.2338	0.0325	0.0165	1.1	2595	2347	4965	0.0015037	3.04229e-07	10.27	8.76626	0.103817	1.17153	9.19397	3.36927	19.0362	20.1282
2021-06-15	6-283	N6	0.4812	0.2066	0.0294	0.0112	1.3	2477	2367	4985	0.00106624	3.07754e-07	10.7758	9.88655	0.0803139	1.08995	9.52418	3.38937	20.6624	21.3122
2021-06-15	6-284	N6	0.7584	0.3454	0.074	0.0312	2.3	2553	2413	4977	0.00337755	1.62342e-06	12.8463	16.2236	0.159828	0.791827	11.4224	3.94619	29.0698	25.1085
2021-06-15	6-285	N6	0.6111	0.282	0.0651	0.0266	2	2555	2423	4988	0.00183698	7.69377e-07	12.6738	10.9491	0.0937077	1.15752	10.2726	3.72167	23.623	22.7447
2021-06-15	6-286	N6	0.3687	0.1649	0.0298	0.0125	1.4	2449	2326	4974	0.00128795	1.56268e-07	8.39156	7.10463	0.107435	1.18114	7.65406	3.0006	15.4962	17.2565
2021-06-15	6-287	N6	0.6149	0.2748	0.0548	0.0205	1.6	2529	2438	4977	0.000456854	7.45189e-08	11.9744	11.6571	0.0314031	1.02722	10.1031	3.76393	23.6316	22.2481
2021-06-15	6-288	N6	0.6103	0.2637	0.0404	0.0159	1.3	2484	2332	4986	0.0033064	2.2453e-06	14.6773	11.3885	0.158114	1.28878	9.81793	4.1171	26.0658	22.6901
2021-06-15	6-289	N6	0.6468	0.2901	0.035	0.016	1.1	2520	2464	4987	0.00153904	7.08141e-07	11.8396	13.3092	0.0636992	0.889579	10.0277	3.96748	25.1488	22.6554
2021-06-15	6-290	N6	0.7014	0.3287	0.0338	0.015	1.2	2517	2443	4988	0.000394205	7.51232e-08	12.2206	12.1804	0.0285633	1.0033	9.83586	3.80864	24.401	22.0209
2021-06-15	6-291	N6	0.4975	0.2142	0.0355	0.0143	1.4	2576	2335	4991	0.0014909	5.06659e-07	10.8353	12.2841	0.113236	0.882057	9.95242	3.6828	23.1194	22.0706
2021-06-15	6-292	N6	0.3615	0.1524	0.0277	0.0074	1.2	2509	2309	4980	0.00110674	2.57939e-07	8.50605	7.44283	0.09578	1.14285	8.65877	3.15693	15.9489	19.1828
2021-06-15	6-293	N6	0.4998	0.237	0.0296	0.0135	1.4	2449	2345	4987	0.000901976	3.10492e-07	10.9575	10.0557	0.0633268	1.08967	9.28493	3.4713	21.0132	20.5987
2021-06-15	6-294	N6	0.5833	0.2706	0.0431	0.018	1.7	2440	2326	4985	0.00230313	1.51328e-06	10.6629	12.7068	0.11407	0.839152	9.93728	3.64678	23.3697	21.9312
2021-06-15	6-295	N6	0.5574	0.2495	0.033	0.0143	1.2	2523	2325	4978	0.00102791	5.3844e-07	11.0121	11.9609	0.0568451	0.920674	9.88158	3.68026	22.973	21.9749
2021-06-15	6-297	N6	0.4281	0.1979	0.0384	0.0182	1.8	2492	2360	4967	0.000781794	2.31421e-07	7.63367	8.37733	0.0552454	0.91123	8.14421	2.97028	16.011	17.9256
2021-06-15	6-298	N6	0.7456	0.3338	0.0692	0.0307	2	2607	2373	4989	0.00177423	4.69597e-07	14.9311	13.1568	0.0954358	1.13485	11.165	4.08398	28.0879	24.7257
2021-06-15	6-299	N6	0.4078	0.1964	0.028	0.014	1.3	2532	2316	4976	0.000280595	5.90214e-08	7.36734	7.51126	0.059469	0.980839	8.36547	2.87732	14.8786	18.308
2021-06-15	6-300	N6	0.4284	0.1939	0.0354	0.0139	1.5	2506	2419	4985	0.00128726	4.3456e-07	8.77466	10.0246	0.0798988	0.875311	8.91356	3.15975	18.7993	19.8938
2021-06-15	6-301	N6	0.5508	0.2401	0.0511	0.02	1.9	2487	2403	4978	0.00104618	3.62052e-07	11.6632	10.9545	0.0685447	1.0647	9.84937	3.33006	22.6177	21.7933
2021-06-15	6-302	N6	0.574	0.2624	0.043	0.0181	1.6	2512	2357	4995	0.00169157	8.91909e-07	11.0137	12.5077	0.0990012	0.880555	10.4134	3.52709	23.5214	22.7508
2021-06-15	6-303	N6	0.3741	0.1496	0.0375	0.0135	1.2	2628	2319	4989	0.00176426	1.0629e-06	10.2014	8.5101	0.136279	1.19874	8.81314	3.35711	18.7115	19.7095
2021-06-15	6-304	N6	0.5561	0.2551	0.0361	0.0149	1.3	2518	2448	5002	0.00201725	8.8379e-07	12.5444	10.6837	0.100268	1.17416	10.0109	3.71989	23.2281	22.3184
2021-06-15	6-305	N6	0.6016	0.2802	0.0371	0.0181	1.3	2569	2405	4976	0.00124926	1.39291e-07	10.3341	11.5832	0.0991227	0.892158	9.39837	3.584	21.9173	20.8449
2021-06-15	6-306	N6	0.5766	0.2722	0.053	0.024	2.1	2481	2470	4982	0.0015623	7.16476e-07	9.70978	11.272	0.0991752	0.861409	9.32651	3.44913	20.9817	20.5091
2021-06-15	6-307	N6	0.4923	0.2287	0.048	0.0207	1.9	2549	2484	4997	0.00197388	3.45418e-07	8.43163	10.4055	0.181392	0.810308	8.83259	3.34739	18.8371	19.5502
2021-06-15	6-308	N6	0.5098	0.2363	0.0395	0.0181	1.6	2511	2380	4983	0.000655398	1.24555e-07	9.43118	8.98659	0.0654525	1.04947	8.96201	3.27881	18.4178	19.6167
2021-06-15	6-309	N6	0.4815	0.2151	0.0293	0.0118	1.3	2505	2430	4989	0.00206828	9.62723e-07	11.6914	9.64661	0.103597	1.21197	9.7085	3.30617	21.338	21.2562
2021-06-15	6-310	N6	0.3651	0.1618	0.0279	0.0125	1.5	2570	2389	4988	0.00167604	8.84975e-07	8.59495	7.0905	0.134202	1.21218	7.91005	3.09105	15.6854	17.6168
2021-06-15	6-311	N6	0.3767	0.1715	0.0268	0.0114	1.4	2555	2378	4979	0.000403878	8.16848e-08	7.86117	8.17473	0.0350074	0.961642	8.58112	3.07201	16.0359	18.7128
2021-06-15	6-312	N6	0.3531	0.1622	0.0217	0.0112	1.1	2268	2152	4670	0.000376663	6.45471e-08	7.11628	7.10276	0.0634822	1.0019	7.01672	2.99185	14.219	16.1243
2021-06-15	6-313	N6	0.616	0.2834	0.0448	0.0196	1.7	2540	2316	4972	0.00145656	4.78478e-07	12.3297	10.9237	0.0741155	1.12871	9.79095	3.84746	23.2534	21.8608
2021-06-15	6-314	N6	0.4426	0.1817	0.0272	0.0103	1.1	2459	2388	4989	0.000796176	2.0169e-07	9.60631	10.2875	0.0543226	0.933787	9.35037	3.5192	19.8938	20.8725
2021-06-15	6-319	N6	0.4995	0.2244	0.0292	0.0136	1.1	2547	2410	4986	0.00168628	6.23754e-07	9.91109	11.5969	0.108026	0.854636	8.84537	3.48426	21.508	20.1329
2021-06-15	6-320	N6	0.7111	0.3087	0.0615	0.0244	2	2627	2341	4985	0.00316777	1.4196e-06	15.6364	12.6147	0.150788	1.23954	10.7718	3.95704	28.251	24.1108
2021-06-15	6-321	N6	0.6632	0.2987	0.0582	0.026	1.9	2402	2339	4973	0.00179897	1.07783e-06	11.2489	12.9181	0.0824398	0.87079	9.84815	3.95657	24.167	21.924
2021-06-15	6-323	N6	0.5092	0.2394	0.0348	0.0172	1.5	2438	2433	4992	0.000955954	9.41212e-08	9.45191	10.4079	0.0711108	0.908151	9.0721	3.25162	19.8598	20.0397
2021-06-15	6-324	N6	0.6767	0.3031	0.0359	0.0127	1	2509	2465	4983	0.00790181	1.2945e-05	11.2882	19.19	0.304406	0.588236	10.5851	4.53955	30.4782	24.4704
2021-06-15	6-326	N6	0.6376	0.2851	0.0555	0.0224	1.8	2519	2434	4976	0.000328994	4.28067e-08	12.0887	12.2433	0.0332714	0.987373	9.07138	4.05504	24.3319	20.7176
2021-06-15	6-327	N6	0.5839	0.2175	0.0431	0.0237	1.6	2540	2358	4978	0.0016734	2.92556e-07	10.6018	8.92876	0.110179	1.18738	8.23979	3.53911	19.5306	18.7389
2021-06-15	6-328	N6	0.8191	0.3771	0.0589	0.0237	1.6	2523	2440	4990	0.00107831	5.75662e-07	16.2348	16.6517	0.0672197	0.974964	11.5851	4.26782	32.8864	25.7654
2021-06-15	6-329	N6	0.4078	0.1889	0.0335	0.0128	1.6	2590	2362	4994	0.000982039	1.32535e-07	9.01593	8.03443	0.0813865	1.12216	9.089	3.15657	17.0504	19.7941
2021-06-15	6-330	N6	0.6396	0.2856	0.0379	0.0144	1.3	2477	2497	4989	0.000818398	2.13225e-07	12.3285	12.7209	0.0573291	0.969156	9.56304	4.22164	25.0494	21.9848
2021-06-15	6-331	N6	0.8084	0.3586	0.04	0.015	1.2	2498	2475	4993	0.00101834	3.34221e-07	14.6116	15.1581	0.0596505	0.963945	10.9886	4.22778	29.7697	24.827
2021-06-15	6-332	N6	0.6087	0.2746	0.0442	0.0201	1.6	2634	2345	4981	0.000571149	2.52594e-07	11.9585	12.2994	0.0507931	0.972285	10.051	3.55698	24.2579	22.3058
2021-06-15	6-333	N6	0.6458	0.281	0.0495	0.0168	1.6	2577	2406	4992	0.00197944	5.45872e-07	12.4173	14.3966	0.112714	0.862512	10.552	3.83584	26.8139	23.3724
2021-06-15	6-335	N6	0.7317	0.331	0.0532	0.0211	1.7	2568	2402	4984	0.000935416	4.08227e-07	13.3559	13.9194	0.067276	0.959516	10.2117	4.12656	27.2752	22.983
2021-06-15	6-336	N6	0.6329	0.2891	0.0429	0.0187	1.4	2479	2324	4986	0.0020538	1.15548e-06	11.6337	13.6866	0.103724	0.850011	10.2008	3.90135	25.3203	22.9019
2021-06-15	6-337	N6	0.5904	0.2669	0.0418	0.0161	1.5	2518	2405	4991	0.00134451	3.29247e-07	12.7329	11.7336	0.0868089	1.08516	10.151	3.77004	24.4665	22.4512
2021-06-15	6-338	N6	0.59	0.2668	0.038	0.0175	1.6	2498	2299	4982	0.000379661	5.82179e-08	11.5258	11.1851	0.0268247	1.03046	9.03914	3.78409	22.7109	20.6231
2021-06-15	6-339	N6	0.5735	0.2645	0.0451	0.0151	1.9	2550	2425	4989	0.0015698	5.27505e-07	11.7025	10.1482	0.0875039	1.15317	9.50051	3.62598	21.8507	21.1184
2021-06-15	6-340	N6	0.4422	0.1999	0.0417	0.019	1.6	2416	2277	4993	0.000425237	6.7457e-08	8.77868	9.08678	0.0516886	0.966093	7.96433	3.45694	17.8655	17.9387
2021-06-15	6-341	N6	0.4302	0.1997	0.0265	0.0126	1.2	2535	2302	4974	0.000262958	4.57901e-08	8.66943	8.69843	0.0328835	0.996666	8.99539	3.1024	17.3679	19.694
2021-06-15	6-342	N6	0.4935	0.2164	0.0361	0.0116	1.6	2578	2382	4982	0.00235485	4.48277e-07	9.12444	11.4793	0.17481	0.794861	9.26698	3.35646	20.6037	20.6987
2021-06-15	6-343	N6	0.6284	0.2754	0.0405	0.0116	1.4	2589	2367	4989	0.000990697	2.93027e-07	11.4811	12.285	0.0570572	0.934563	9.80504	3.68475	23.7662	21.9169
2021-06-15	6-344	N6	0.6065	0.2645	0.0381	0.0131	1.2	2522	2430	4977	0.000640538	2.54575e-07	11.1309	11.7228	0.0555495	0.949509	9.84196	3.78408	22.8537	22.0249
2021-06-15	6-345	N6	0.8785	0.3869	0.0523	0.0147	1.3	2527	2470	4998	0.00409752	2.99235e-06	14.2776	18.3465	0.13954	0.778221	11.3603	4.28796	32.624	25.8173
2021-06-15	6-346	N6	0.7594	0.3408	0.0581	0.0257	1.6	2572	2400	4985	0.000843703	1.74923e-07	15.1613	14.3193	0.0380616	1.0588	10.8147	4.2111	29.4806	24.3062
2021-06-15	6-347	N6	0.3255	0.1346	0.025	0.0075	1.2	2562	2417	4985	0.000395963	5.81733e-08	7.91404	7.77112	0.0357785	1.01839	8.56587	3.01203	15.6852	19.131
2021-06-15	6-348	N6	0.5351	0.2356	0.0362	0.0188	1.1	2516	2357	4991	0.00182811	8.90343e-07	11.2471	9.54349	0.128911	1.17851	9.1603	3.63228	20.7906	20.5394
2021-06-15	6-349	N6	0.4848	0.2079	0.0406	0.0175	1.8	2612	2335	4986	0.000620485	1.35338e-07	10.1589	9.63287	0.0448454	1.05461	9.20147	3.168	19.7918	20.4138
2021-06-15	6-350	N6	0.633	0.2867	0.0452	0.0165	1.5	2560	2375	4976	0.00153702	5.60451e-07	11.2416	12.7772	0.0865716	0.879817	10.1409	3.87828	24.0188	22.5263
2021-06-15	6-351	N6	0.6015	0.2851	0.0365	0.0144	1.3	2596	2314	4972	0.00108604	6.21945e-07	10.6512	10.8246	0.10641	0.983981	9.72148	3.61213	21.4759	21.4996
2021-06-15	6-352	N6	0.6332	0.3035	0.0319	0.0164	1.3	2516	2406	4973	0.0024418	8.06577e-07	10.1876	12.6084	0.146018	0.807998	9.90495	3.55536	22.796	21.8769
2021-06-15	6-353	N6	0.495	0.2101	0.0294	0.0093	1.1	2558	2410	4981	0.000620324	1.53846e-07	11.3819	11.6866	0.0454348	0.97393	9.20777	3.88139	23.0685	21.3068
2021-06-15	6-354	N6	0.5646	0.248	0.0347	0.0156	1.4	2582	2379	4987	0.00193646	2.9824e-07	12.0773	10.141	0.122052	1.19094	9.56309	3.61612	22.2182	21.541
2021-06-15	6-355	N6	0.5405	0.2298	0.0364	0.0164	1.3	2499	2389	4994	0.00267617	2.29337e-06	13.7941	11.1385	0.111378	1.23842	10.0604	3.73383	24.9326	22.6099
2021-06-15	6-356	N6	0.5921	0.2583	0.0395	0.0123	1.4	2556	2402	4991	0.00251556	8.63137e-07	11.8315	9.54644	0.142977	1.23936	9.47663	3.50927	21.3779	21.0665
2021-06-15	6-357	N6	0.5641	0.2586	0.0474	0.0172	1.5	2519	2422	4989	0.00306505	1.10628e-06	8.77981	11.8218	0.195765	0.742678	8.98683	3.38703	20.6017	20.1147
2021-06-15	6-358	N6	0.6391	0.2939	0.054	0.0214	1.7	2423	2390	4981	0.00148014	6.34829e-07	11.409	12.8343	0.0915799	0.888945	9.90448	3.91775	24.2434	21.945
2021-06-15	6-359	N6	0.6391	0.2995	0.0474	0.0212	1.5	2462	2278	4994	0.00210554	1.06838e-06	11.2631	13.3513	0.11252	0.843592	9.5871	4.0181	24.6144	21.5639
2021-06-15	6-360	N6	0.5127	0.241	0.0415	0.0175	1.6	2484	2463	4988	0.00194376	1.48794e-06	9.52921	11.4567	0.109064	0.83176	9.44047	3.51806	20.9859	20.8403
2021-06-15	6-361	N6	0.5761	0.2645	0.0408	0.0199	1.4	2533	2408	4981	0.00101245	1.3963e-07	9.83068	10.843	0.103402	0.906638	9.50319	3.6827	20.6737	20.9366
2021-06-15	6-362	N6	0.6266	0.2883	0.0466	0.0232	1.6	2590	2408	4997	0.000566124	1.20579e-07	12.2706	12.5229	0.0302289	0.979854	10.2337	3.83839	24.7935	22.6685
2021-06-15	6-363	N6	0.6991	0.3162	0.0451	0.0207	1.6	2550	2407	4979	0.000399153	5.10137e-08	12.8147	12.5429	0.0321967	1.02167	9.88061	4.0002	25.3576	22.1263
2021-06-15	6-364	N6	0.9148	0.3957	0.0515	0.0217	1.2	2583	2322	4983	0.00123632	6.04036e-07	18.568	19.5468	0.0406476	0.949921	12.5156	4.67682	38.1148	28.9777
2021-06-15	6-365	N6	0.633	0.2999	0.04	0.0187	1.5	2576	2390	4988	0.00321008	1.03466e-06	13.2157	10.0057	0.156279	1.32082	9.9346	3.42236	23.2214	21.9977
2021-07-17	7-001	N7	0.6412	0.2967	0.0455	0.0181	1.5	2462	2401	4993	0.00163906	5.98181e-07	12.72	14.3555	0.078855	0.886069	10.3229	4.26907	27.0755	23.042
2021-07-17	7-002	N7	0.6923	0.3159	0.0423	0.0194	1.3	2495	2394	4989	0.000815227	3.68506e-07	13.7417	13.474	0.0577455	1.01987	10.3019	3.85641	27.2157	24.0368
2021-07-17	7-003	N7	0.4609	0.2117	0.0226	0.0128	1.1	2596	2320	4986	0.00157645	2.27057e-07	10.2675	8.691	0.132395	1.18139	8.53656	3.53922	18.9585	19.7059
2021-07-17	7-004	N7	0.5682	0.2685	0.0312	0.0158	1.2	2514	2453	4990	0.00166833	3.35288e-07	10.3015	11.9695	0.134273	0.860649	9.82661	3.62589	22.271	22.1282
2021-07-17	7-005	N7	0.5552	0.2617	0.0259	0.0167	1.2	2569	2419	4992	0.000858295	3.12936e-07	10.8789	10.3874	0.0816186	1.04732	10.1719	3.53343	21.2663	22.5153
2021-07-17	7-006	N7	0.5694	0.2556	0.0368	0.0156	1.6	2568	2404	4989	0.000552006	2.5284e-07	12.4265	12.4817	0.0746693	0.995572	10.0453	4.03012	24.9082	22.6578
2021-07-17	7-007	N7	0.4918	0.2234	0.0378	0.0148	1.5	2402	2336	4980	0.00078756	2.03169e-07	11.4461	10.7965	0.0617663	1.06017	8.91958	3.77551	22.2426	20.2653
2021-07-17	7-008	N7	0.7255	0.3435	0.0491	0.0239	1.9	2560	2415	4982	0.00123222	6.40131e-07	15.8507	15.203	0.0653031	1.0426	10.6921	4.45502	31.0537	24.5091
2021-07-17	7-009	N7	0.5793	0.241	0.0411	0.0171	1.7	2553	2416	4989	0.000862279	2.84852e-07	13.3587	12.5923	0.0736188	1.06086	9.88256	4.14774	25.951	22.6401
2021-07-17	7-010	N7	0.494	0.218	0.0392	0.0158	1.6	2509	2474	4992	0.00138583	4.86155e-07	10.5493	11.7567	0.0904592	0.897308	8.34447	3.92824	22.306	19.7615
2021-07-17	7-011	N7	0.5052	0.2284	0.0337	0.0196	1.9	2591	2376	4982	0.00109967	3.56743e-07	10.1513	11.2476	0.0674912	0.902531	9.94346	3.59001	21.3989	21.9872
2021-07-17	7-012	N7	0.4752	0.2067	0.0343	0.0108	1.3	2481	2479	4990	0.00147053	2.20013e-07	11.8262	10.356	0.102124	1.14197	9.26713	3.58405	22.1821	20.8192
2021-07-17	7-013	N7	0.3925	0.1734	0.0239	0.0135	1.2	2412	2355	4981	0.000740046	1.42864e-07	9.26739	8.83081	0.0787212	1.04944	8.73971	3.23973	18.0982	19.268
2021-07-17	7-014	N7	0.2758	0.1297	0.0219	0.0124	1.2	2494	2384	4908	0.000393174	8.62573e-08	6.45822	6.39865	0.0655112	1.00931	7.83251	2.74704	12.8569	17.0168
2021-07-17	7-015	N7	0.3343	0.1533	0.0433	0.0173	1.7	2480	2496	4977	0.000781448	1.71132e-07	7.44097	7.54663	0.115451	0.985999	8.32401	2.83855	14.9876	18.1
2021-07-17	7-016	N7	0.3724	0.1788	0.031	0.0139	1	2432	2336	4902	0.000336244	4.56255e-08	7.58012	7.41432	0.0517511	1.02236	7.83386	3.00946	14.9944	17.3516
2021-07-17	7-017	N7	0.3493	0.16	0.0432	0.0183	1.8	2463	2368	4989	0.000783715	2.47475e-07	8.49787	7.71453	0.0700899	1.10154	8.56903	2.95514	16.2124	18.673
2021-07-17	7-018	N7	0.4732	0.2213	0.037	0.0112	1.4	2492	2453	4992	0.00260577	9.06195e-07	10.191	12.7911	0.179378	0.796725	9.86302	3.55042	22.9821	21.743
2021-07-17	7-019	N7	0.3825	0.1785	0.0397	0.0195	1.8	2541	2433	4983	0.00101068	2.59024e-07	9.46158	8.45105	0.0820592	1.11958	9.07928	2.98257	17.9126	19.7219
2021-07-17	7-020	N7	0.3771	0.1751	0.0302	0.0149	1.2	2479	2378	4988	0.000639201	1.32085e-07	8.35692	7.75236	0.0592269	1.07798	8.46237	3.0137	16.1093	18.4562
2021-07-17	7-021	N7	0.4937	0.2196	0.0351	0.012	1.4	2548	2438	4994	0.00312833	1.14633e-06	12.3998	9.27143	0.171654	1.33742	9.30649	3.52442	21.6712	20.5962
2021-07-17	7-022	N7	0.6296	0.2749	0.0457	0.0194	1.2	2506	2420	4984	0.00128483	3.11831e-07	14.2941	13.0535	0.0638891	1.09504	10.2382	3.77615	27.3476	22.9062
2021-07-17	7-023	N7	0.6175	0.2779	0.0442	0.0182	1.5	2412	2414	4969	0.00236594	5.93403e-07	12.0571	14.4231	0.128037	0.835961	10.3701	3.86598	26.4802	22.9422
2021-07-17	7-024	N7	0.5165	0.2339	0.0305	0.0162	1.4	2491	2438	4984	0.000694043	2.89173e-07	11.5379	10.9165	0.0301765	1.05692	9.69202	3.60801	22.4544	21.3301
2021-07-17	7-025	N7	0.6895	0.29	0.0394	0.0154	1.3	2418	2542	4986	0.00162868	6.29177e-07	14.5507	12.9382	0.0702911	1.12463	10.6564	3.97622	27.4889	24.1545
2021-07-17	7-026	N7	0.5558	0.2395	0.0316	0.0134	1.3	2464	2475	4959	0.000507034	8.27305e-08	11.2836	11.1456	0.0462113	1.01238	9.80013	3.63783	22.4292	22.1716
2021-07-17	7-027	N7	0.7175	0.3086	0.0373	0.0166	1.3	2541	2411	4986	0.00233281	3.7805e-07	13.3081	15.6409	0.133533	0.850858	10.9155	3.99209	28.949	24.7449
2021-07-17	7-028	N7	0.3299	0.1463	0.0245	0.0145	1.2	2468	2447	4981	0.000764637	2.02597e-07	9.2353	8.52727	0.0683292	1.08303	8.75213	3.16196	17.7626	19.1222
2021-07-17	7-029	N7	0.5586	0.2445	0.0455	0.0188	1.8	2469	2480	4998	0.000984129	4.84095e-07	13.7006	14.3597	0.0782749	0.954105	10.6858	3.97016	28.0603	23.5578
2021-07-17	7-030	N7	0.4776	0.2127	0.0375	0.0163	1.5	2524	2454	4982	0.00142085	1.2452e-06	13.1301	12.0397	0.0767605	1.09057	10.2187	3.7097	25.1698	22.4562
2021-07-17	7-031	N7	0.7785	0.3318	0.0423	0.0137	1.3	2578	2367	4969	0.00134475	5.16034e-07	16.1415	15.7872	0.0746957	1.02244	11.4557	4.11041	31.9287	25.7682
2021-07-17	7-032	N7	0.3756	0.1574	0.0343	0.0161	1.8	2097	2117	4975	0.000591539	1.03737e-07	9.44085	8.93128	0.0486164	1.05705	8.10604	3.1173	18.3721	18.5649
2021-07-17	7-033	N7	0.4301	0.1883	0.0357	0.0131	1.4	2478	2438	4982	0.000490386	1.22235e-07	10.4886	10.959	0.0427643	0.957077	9.29657	3.3493	21.4476	20.5901
2021-07-17	7-035	N7	0.3425	0.1536	0.0222	0.0163	1	2430	2336	4980	0.000793183	2.61362e-07	7.06196	7.17858	0.103861	0.983755	8.56304	2.94025	14.2405	18.7674
2021-07-17	7-036	N7	0.4293	0.1859	0.0344	0.0103	1.3	2474	2480	4981	0.000854407	2.28379e-07	8.81599	9.66742	0.0863314	0.911928	9.03941	3.22542	18.4834	19.9913
2021-07-17	7-037	N7	0.2998	0.1299	0.0186	0.0134	1.2	2492	2486	4979	0.000830767	2.4611e-07	8.8298	9.65628	0.0857264	0.91441	9.03919	3.22461	18.4861	19.9777
2021-07-17	7-038	N7	0.2674	0.1215	0.0209	0.0083	1.2	2511	2409	4988	0.0015563	5.47112e-07	5.94801	7.46107	0.150289	0.797207	7.90609	2.81216	13.4091	17.3061
2021-07-17	7-039	N7	0.3873	0.1587	0.031	0.0078	1.6	2532	2424	5005	0.000760184	1.25409e-07	10.5837	9.824	0.0692831	1.07733	9.68666	3.0941	20.4077	21.0692
2021-07-17	7-040	N7	0.3948	0.1747	0.0284	0.0126	1.4	2430	2441	4993	0.000924944	1.09644e-07	10.6835	9.75899	0.0582055	1.09474	9.37202	3.3236	20.4425	20.6092
2021-07-17	7-041	N7	0.4186	0.1904	0.0352	0.0112	1.7	2602	2379	4992	0.0011339	3.27636e-07	10.5188	9.39798	0.0655768	1.11927	9.36339	3.45505	19.9168	20.8239
2021-07-17	7-042	N7	0.2668	0.1195	0.0154	0.0062	1.3	2503	2480	4986	0.000816903	1.24051e-07	7.15005	6.33317	0.106719	1.12898	7.70676	2.90552	13.4832	17.18
2021-07-17	7-043	N7	0.4728	0.208	0.034	0.0088	1.9	2572	2340	4974	0.000394352	7.37114e-08	10.9223	11.218	0.046326	0.973636	9.41131	3.75197	22.1403	21.476
2021-07-17	7-044	N7	0.5187	0.2346	0.0403	0.0161	1.6	2466	2465	4980	0.000662396	1.70057e-07	10.0272	10.1937	0.0848174	0.983667	9.35874	3.45021	20.2209	20.8788
2021-07-17	7-045	N7	0.5723	0.2539	0.0518	0.0183	1.9	2565	2381	4989	0.000520507	1.35809e-07	12.1698	12.5571	0.0507757	0.96916	9.88337	3.83538	24.7268	22.092
2021-07-17	7-046	N7	0.4448	0.2014	0.0298	0.0199	1.6	2594	2342	4977	0.000645549	2.35368e-07	11.0568	10.764	0.0567723	1.02719	9.25764	3.8025	21.8208	20.9869
2021-07-17	7-047	N7	0.4653	0.2147	0.0433	0.0145	1.6	2316	2533	4951	0.00500881	2.59728e-06	8.55047	13.5592	0.333162	0.630603	9.76679	3.69179	22.1097	21.9395
2021-07-17	7-048	N7	0.3384	0.1692	0.0425	0.0186	1.7	2504	2414	4988	0.00283865	1.08405e-06	5.81743	8.65591	0.22938	0.672076	7.64769	3.09607	14.4733	17.3258
2021-07-17	7-049	N7	0.39	0.1789	0.0359	0.0148	1.5	2524	2450	4985	0.000577475	1.27348e-07	9.71174	9.90826	0.0694835	0.980166	9.46042	3.538	19.62	21.2505
2021-07-17	7-050	N7	0.5655	0.2717	0.0748	0.0291	2.2	2508	2406	4999	0.00162083	5.64836e-07	11.712	13.3322	0.105532	0.878479	9.2621	3.96795	25.0442	21.4287
2021-07-17	7-051	N7	0.5095	0.2529	0.0597	0.0254	1.7	2504	2487	4986	0.00165632	7.90201e-07	10.0424	11.6916	0.122198	0.858939	9.91953	3.59588	21.734	22.1823
2021-07-17	7-052	N7	0.533	0.2582	0.0612	0.0269	2	2466	2359	4981	0.00212554	4.83261e-07	12.6016	10.4762	0.114371	1.20288	9.80341	3.62326	23.0778	22.0728
2021-07-17	7-053	N7	0.3482	0.1647	0.027	0.0124	1.4	2528	2318	4973	0.000308704	4.51469e-08	8.28507	8.30668	0.04638	0.997398	8.03067	3.19202	16.5918	18.4686
2021-07-17	7-054	N7	0.4095	0.1867	0.0367	0.0138	1.6	2576	2398	4983	0.00123182	4.3893e-07	11.595	10.3902	0.0789016	1.11596	9.57824	3.67407	21.9852	21.7767
2021-07-17	7-055	N7	0.5422	0.2532	0.0396	0.0157	1.2	2401	2486	4993	0.000477807	1.03781e-07	11.1808	11.1239	0.0521465	1.00512	9.77858	3.59734	22.3047	21.5253
2021-07-17	7-056	N7	0.5436	0.2541	0.0616	0.0249	1.9	2586	2387	4973	0.00356796	1.27938e-06	12.9654	9.3988	0.223145	1.37947	9.74946	3.47137	22.3642	21.5338
2021-07-17	7-057	N7	0.5293	0.2455	0.0544	0.0223	1.7	2512	2466	4985	0.00146539	7.3445e-07	10.3653	11.8204	0.118498	0.876903	9.97333	3.41836	22.1857	21.7639
2021-07-17	7-058	N7	0.4972	0.2323	0.0358	0.0133	1.2	2432	2358	4992	0.000484591	2.26537e-07	9.82108	9.98431	0.0949693	0.983651	9.36315	3.36559	19.8054	20.5881
2021-07-17	7-059	N7	0.544	0.2554	0.0572	0.026	2	2441	2424	4994	0.000973412	3.01223e-07	11.6245	10.9701	0.0842105	1.05965	9.98825	3.43718	22.5946	21.7946
2021-07-17	7-060	N7	0.5202	0.2465	0.0442	0.0181	1.3	2517	2434	4993	0.00102745	1.9552e-07	9.74465	10.7715	0.0911169	0.904666	9.34618	3.41402	20.5162	20.5655
2021-07-17	7-061	N7	0.3168	0.1524	0.0296	0.0135	1.2	2295	2237	4601	0.000908278	5.69866e-08	5.8009	6.70912	0.14704	0.864629	7.33598	2.85966	12.51	16.2184
2021-07-17	7-062	N7	0.4644	0.2141	0.0355	0.016	1.7	2510	2456	4981	0.00108195	3.06498e-07	10.2504	11.3192	0.0656861	0.905576	9.39896	3.53114	21.5696	20.7291
2021-07-17	7-063	N7	0.5128	0.2309	0.0506	0.0199	1.8	2517	2445	4985	0.00196055	7.72038e-07	12.9412	10.9868	0.0930544	1.17788	9.67736	3.8985	23.928	21.5466
2021-07-17	7-064	N7	0.4822	0.2236	0.0428	0.0171	1.7	2533	2433	4974	0.000908128	3.93758e-07	11.5358	10.6966	0.0500031	1.07846	9.51585	3.64718	22.2324	21.0332
2021-07-17	7-065	N7	0.3647	0.1691	0.0308	0.0132	1.4	2457	2382	4981	0.00100588	3.94005e-07	8.35093	9.06852	0.0694461	0.92087	8.68927	3.09672	17.4195	19.0947
2021-07-17	7-066	N7	0.5316	0.228	0.0437	0.0155	1.4	2569	2382	4989	0.0024632	1.02335e-06	10.2471	12.7102	0.142256	0.80621	9.32332	3.69599	22.9573	20.9736
2021-07-17	7-067	N7	0.6257	0.2777	0.0483	0.0211	1.6	2481	2360	4985	0.00147422	9.08437e-07	11.9347	10.6056	0.0752646	1.12533	9.01073	3.90509	22.5403	20.5663
2021-07-17	7-068	N7	0.5826	0.2483	0.045	0.0173	1.6	2505	2472	4991	0.00175222	1.2099e-06	11.5118	13.2075	0.0832987	0.871612	10.4793	3.88307	24.7193	23.2627
2021-07-17	7-069	N7	0.4458	0.2019	0.0313	0.0143	1.6	2447	2391	4983	0.000456232	9.88636e-08	8.40883	8.86207	0.0603273	0.948856	8.39537	3.17967	17.2709	18.7747
2021-07-17	7-070	N7	0.6295	0.2555	0.0407	0.015	1.6	2548	2400	4978	0.00128205	3.8946e-07	13.0515	14.3332	0.0732753	0.910581	10.3925	4.18567	27.3847	23.671
2021-07-17	7-071	N7	0.3645	0.1537	0.0247	0.0088	1.3	2552	2421	4986	0.00283173	1.47993e-06	7.19016	10.0218	0.21458	0.717449	8.33689	3.22531	17.212	18.8033
2021-07-17	7-072	N7	0.4482	0.2055	0.032	0.0144	1.5	2427	2446	4968	0.0027303	1.49592e-06	7.44917	10.1794	0.208919	0.731786	8.52158	3.44631	17.6286	18.9992
2021-07-17	7-073	N7	0.8204	0.3562	0.0579	0.0243	1.8	2434	2430	4980	0.00131112	1.52417e-07	13.6987	15.0098	0.104733	0.912649	10.4525	4.27091	28.7085	23.7233
2021-07-17	7-074	N7	0.3844	0.1718	0.023	0.0097	1.1	2537	2332	4967	0.00142921	3.90474e-07	9.17759	7.79043	0.0995386	1.17806	8.91131	3.10569	16.968	19.5079
2021-07-17	7-075	N7	0.5756	0.2671	0.0409	0.0191	1.6	2497	2397	4950	0.000901554	3.20821e-07	11.2646	10.4722	0.0627453	1.07567	9.59717	3.70422	21.7369	21.3476
2021-07-17	7-076	N7	0.9225	0.4243	0.0916	0.0388	2	2487	2417	4991	0.00375099	1.04968e-06	13.556	17.307	0.172345	0.783268	11.1079	4.33783	30.863	24.9129
2021-07-17	7-077	N7	0.3218	0.1383	0.0244	0.0136	1.3	2582	2365	4981	0.000475014	1.44496e-07	7.2482	7.71875	0.0685509	0.939038	7.58095	3.17498	14.967	17.2029
2021-07-17	7-078	N7	0.7302	0.3537	0.0734	0.0189	1.8	2431	2402	4982	0.00134094	2.67349e-07	11.7868	13.1236	0.0796028	0.898142	10.7252	3.90922	24.9104	23.6817
2021-07-17	7-079	N7	0.6771	0.3084	0.0587	0.0239	1.9	2479	2418	4943	0.00287726	1.33585e-06	16.1889	13.3261	0.130516	1.21483	10.9525	4.19483	29.515	24.6968
2021-07-17	7-080	N7	0.6538	0.2959	0.07	0.0216	2	2457	2411	4983	0.00124841	5.03602e-07	13.6876	14.8136	0.0599588	0.923988	10.7367	4.13482	28.5012	24.183
2021-07-17	7-081	N7	0.6768	0.2862	0.0528	0.0252	1.9	2499	2467	4968	0.00178341	8.31775e-07	12.9095	14.0773	0.0864835	0.917046	10.3658	4.07811	26.9868	23.5246
2021-07-17	7-082	N7	0.244	0.1124	0.0222	0.0111	1.5	2536	2306	4951	0.000954837	2.63057e-07	6.16247	5.23503	0.112176	1.17716	7.56076	2.61713	11.3975	16.6267
2021-07-17	7-083	N7	0.5011	0.2151	0.0408	0.0109	1.6	2472	2530	4994	0.00164069	1.94415e-07	10.2842	11.9248	0.125109	0.862425	9.51378	3.60816	22.209	21.1756
2021-07-17	7-084	N7	0.4227	0.1852	0.0353	0.0157	1.2	2525	2425	4992	0.00376064	4.62262e-06	10.9867	7.23764	0.204606	1.518	8.88393	3.34163	18.2244	19.6459
2021-07-17	7-085	N7	0.5024	0.2126	0.0351	0.0117	1.3	2512	2417	4996	0.00111044	3.28138e-07	11.4229	10.3128	0.0725864	1.10765	9.63195	3.48822	21.7357	21.1888
2021-07-17	7-086	N7	0.4015	0.1804	0.0334	0.015	1.4	2506	2426	4994	0.000863191	1.95932e-07	10.4542	10.2101	0.084964	1.02391	9.64403	3.31938	20.6644	21.0905
2021-07-17	7-087	N7	0.3918	0.17	0.0308	0.0129	1.5	2443	2302	4980	0.00107342	3.47852e-07	10.3591	11.4211	0.0669513	0.907014	9.58403	3.52626	21.7802	21.128
2021-07-17	7-088	N7	0.4178	0.1836	0.0364	0.0123	1.6	2478	2486	4989	0.000629855	1.70061e-07	11.3631	11.3245	0.0397793	1.00341	9.73682	3.58993	22.6875	21.4462
2021-07-17	7-089	N7	0.6083	0.2539	0.0415	0.0148	1.3	2514	2448	4987	0.000558711	1.07167e-07	13.8151	13.8252	0.0385431	0.99927	10.5571	4.0091	27.6403	23.616
2021-07-17	7-090	N7	0.4985	0.219	0.0373	0.0154	1.5	2478	2465	4992	0.00187556	9.20212e-07	12.886	11.0765	0.0859955	1.16336	10.4409	3.55497	23.9625	22.7301
2021-07-17	7-091	N7	0.532	0.2369	0.0359	0.0152	1.4	2538	2402	4998	0.000493509	1.15173e-07	11.5788	11.3356	0.0396597	1.02146	9.41386	3.92424	22.9144	21.9257
2021-07-17	7-092	N7	0.3525	0.1558	0.0266	0.0165	1.4	2412	2387	4970	0.000553391	1.78342e-07	8.47081	8.94307	0.0385648	0.947192	9.08262	3.01886	17.4139	19.763
2021-07-17	7-093	N7	0.4721	0.2117	0.0345	0.01	1.6	2469	2422	4981	0.00294937	7.50137e-07	12.2466	9.29755	0.195232	1.31719	9.39226	3.76305	21.5442	21.5629
2021-07-17	7-094	N7	0.3648	0.1652	0.0201	0.0131	1	2575	2367	4993	0.001046	2.85316e-07	8.76018	9.7985	0.0701578	0.894033	8.97927	3.02707	18.5587	19.8883
2021-07-17	7-096	N7	0.5532	0.2358	0.0515	0.0128	1.9	2502	2433	4966	0.00123335	4.61397e-07	14.1752	13.049	0.059606	1.0863	10.9822	3.82255	27.2242	24.1342
2021-07-17	7-097	N7	0.5867	0.2582	0.043	0.0172	1.6	2462	2487	4971	0.00125121	5.17375e-07	14.691	13.4826	0.0575942	1.08962	11.0487	3.89844	28.1736	24.2098
2021-07-17	7-098	N7	0.552	0.2449	0.038	0.0162	1.5	2544	2423	4981	0.00135693	4.02461e-07	12.6495	14.0025	0.0668095	0.903376	10.7491	3.7278	26.652	23.5539
2021-07-17	7-099	N7	0.3615	0.1682	0.0237	0.0099	1	2509	2430	4988	0.00122367	5.27222e-07	7.5399	8.76109	0.105835	0.860612	8.65244	3.02386	16.301	18.9163
2021-07-17	7-100	N7	0.4291	0.1973	0.0208	0.0077	0.8	2534	2444	4996	0.00038914	8.56731e-08	10.1652	9.84138	0.0320727	1.0329	9.07217	3.37733	20.0066	20.2163
2021-07-17	7-101	N7	0.3861	0.1756	0.0221	0.0081	0.8	2503	2395	4975	0.00124885	1.12364e-07	8.86563	10.1145	0.118771	0.876529	9.10278	3.1891	18.9801	20.1488
2021-07-17	7-102	N7	0.5126	0.2335	0.0401	0.0157	1.6	2501	2466	4980	0.00125114	3.53912e-07	12.9024	11.6513	0.0793511	1.10738	10.0827	3.69791	24.5537	22.3279
2021-07-17	7-103	N7	0.4066	0.1898	0.0281	0.0123	1.2	2411	2316	4987	0.000895934	2.52026e-07	9.38336	10.1248	0.0557349	0.926772	9.17715	3.12458	19.5081	20.1468
2021-07-17	7-104	N7	0.5887	0.2552	0.0439	0.0166	1.6	2590	2342	4970	0.00114399	2.75261e-07	12.9516	11.8288	0.0522167	1.09492	9.7611	3.8774	24.7804	22.5418
2021-07-17	7-106	N7	0.5132	0.2166	0.0439	0.0149	1.4	2477	2506	4992	0.00159191	1.4938e-06	12.0559	13.6082	0.0794662	0.885928	10.0574	3.90438	25.6641	22.4266
2021-07-17	7-107	N7	0.3833	0.1643	0.0288	0.0111	1.3	2462	2332	4982	0.00120744	2.87558e-07	8.23222	9.43952	0.0864145	0.872101	8.01584	3.53624	17.6717	18.5581
2021-07-17	7-108	N7	0.5257	0.2356	0.0344	0.0154	1.5	2494	2379	4987	0.00137481	5.11287e-07	11.1148	12.4722	0.0703615	0.891171	9.36274	3.93436	23.587	21.4581
2021-07-17	7-109	N7	0.5034	0.23	0.0327	0.0139	1.2	2583	2383	4980	0.000432459	9.34695e-08	10.4658	10.1194	0.0530976	1.03423	9.4585	3.57204	20.5852	21.2152
2021-07-17	7-110	N7	0.6106	0.2618	0.049	0.0177	1.6	2537	2446	4992	0.00437712	1.96033e-06	17.1992	12.8221	0.176053	1.34137	10.531	4.31022	30.0213	23.8319
2021-07-17	7-111	N7	0.3088	0.1313	0.0292	0.0111	1.2	2454	2449	4979	0.000407073	9.89516e-08	7.91952	8.25644	0.0354937	0.959193	8.94679	3.07517	16.176	19.5496
2021-07-17	7-112	N7	0.5874	0.2614	0.0404	0.0162	1.4	2490	2475	4981	0.00143503	1.23524e-06	11.058	12.0548	0.129523	0.917306	9.85659	3.75402	23.1128	22.1957
2021-07-17	7-113	N7	0.4365	0.2001	0.0378	0.0152	1.4	2443	2464	4985	0.00107715	3.70597e-07	9.61022	10.2583	0.110126	0.936828	9.20684	3.35642	19.8685	20.239
2021-07-17	7-114	N7	0.3743	0.1707	0.0278	0.0137	1.2	2554	2389	4983	0.000410474	1.29841e-07	7.27897	7.07819	0.0665706	1.02837	8.01613	2.96451	14.3572	17.9904
2021-07-17	7-115	N7	0.3125	0.1357	0.0198	0.008	1.1	2519	2471	4984	0.00107419	1.72372e-07	7.6737	8.73795	0.100652	0.878204	8.33548	3.04801	16.4117	18.4117
2021-07-17	7-116	N7	0.3433	0.1581	0.0293	0.0128	1.4	2508	2474	4994	0.00117062	1.7288e-07	8.12426	9.29454	0.0971874	0.87409	8.38796	3.1443	17.4188	18.5093
2021-07-17	7-117	N7	0.4736	0.2154	0.0299	0.0126	1.2	2587	2341	4960	0.00104627	5.56566e-07	10.6191	11.3709	0.0828592	0.933889	9.16608	3.707	21.99	20.5842
2021-07-17	7-118	N7	0.2306	0.1038	0.019	0.0124	1.1	2440	2317	4777	0.00100188	4.5556e-07	6.58594	5.81051	0.117955	1.13345	7.53305	2.69472	12.3965	16.4715
2021-07-17	7-119	N7	0.51	0.2381	0.0341	0.0156	1.4	2586	2393	4997	0.000753499	2.68299e-07	11.3988	10.65	0.0470609	1.07031	9.692	3.64979	22.0488	21.5433
2021-07-17	7-120	N7	0.6626	0.3028	0.044	0.0131	1.3	2455	2511	4980	0.00120994	1.85367e-07	12.6715	11.4622	0.10246	1.10551	9.62676	3.90102	24.1337	22.0162
2021-07-17	7-123	N7	0.8076	0.3443	0.0683	0.0213	2.1	2536	2399	4977	0.00299226	1.64421e-06	18.4746	15.4823	0.0941645	1.19327	11.0969	4.5992	33.957	25.6037
2021-07-17	7-124	N7	0.742	0.3138	0.0707	0.0251	2	2542	2402	4981	0.00205377	1.56891e-06	14.6251	16.675	0.0896932	0.87707	10.7697	4.47615	31.3001	25.1425
2021-07-17	7-125	N7	0.9692	0.4424	0.05	0.0257	1	2558	2426	4990	0.0016994	2.09858e-06	16.5531	17.5513	0.0683608	0.943123	10.7242	4.47709	34.1044	25.287
2021-07-17	7-126	N7	0.9396	0.4348	0.0485	0.0223	1.1	2499	2448	4980	0.000460704	1.81229e-07	16.5427	16.8212	0.0246766	0.983447	10.3393	4.72566	33.3639	24.5443
2021-07-17	7-127	N7	0.5508	0.234	0.031	0.0198	1.2	2500	2337	4990	0.00135093	9.98507e-07	13.0927	11.9976	0.0703274	1.09128	10.1383	3.94042	25.0902	23.101
2021-07-17	7-128	N7	0.6445	0.2864	0.0551	0.0212	1.8	2542	2392	4987	0.00100364	3.87243e-07	12.563	12.4628	0.0636392	1.00804	9.58104	4.11685	25.0259	21.863
2021-07-17	7-130	N7	0.6311	0.2677	0.0582	0.0269	1.9	2523	2348	4983	0.000371876	1.2141e-07	13.3065	13.0218	0.0350374	1.02187	9.71897	3.87751	26.3283	22.1756
2021-07-17	7-131	N7	0.4195	0.1844	0.0301	0.023	1.4	2444	2444	4981	0.0008639	2.44981e-07	10.9852	10.5931	0.0914255	1.03701	9.1919	3.57886	21.5783	20.8088
2021-07-17	7-132	N7	0.6542	0.3162	0.0799	0.0211	2.1	2476	2499	4990	0.00109702	1.62882e-07	12.3982	11.3083	0.0716897	1.09638	9.86251	3.69935	23.7065	21.7168
2021-07-17	7-133	N7	0.4837	0.2161	0.0278	0.0151	1.1	2479	2464	4983	0.00396093	2.59897e-06	12.904	8.96176	0.215381	1.4399	9.11093	3.53988	21.8658	20.5074
2021-07-17	7-134	N7	0.9174	0.4008	0.0725	0.0226	1.9	2544	2353	4977	0.00189776	1.31278e-06	19.3238	17.6944	0.0810292	1.09209	11.7531	4.94834	37.0183	26.8329
2021-07-17	7-135	N7	0.5133	0.2156	0.0334	0.027	1.1	2430	2467	4981	0.00072361	1.25392e-07	11.301	12.0239	0.0709704	0.939878	9.77908	3.51071	23.3249	21.9295
2021-07-17	7-136	N7	0.4093	0.1834	0.0333	0.0118	1.5	2462	2422	4977	0.000765974	3.28348e-07	10.0106	10.6863	0.0612931	0.936764	9.48249	3.39829	20.6969	20.866
2021-07-17	7-137	N7	0.4654	0.2026	0.0254	0.013	0.9	2479	2425	4980	0.00107924	4.74379e-07	11.3818	10.5834	0.0683	1.07544	9.56407	3.51858	21.9652	21.3485
2021-07-17	7-138	N7	0.4047	0.1765	0.0295	0.0102	1.2	2517	2425	4979	0.00256286	1.51593e-06	8.14735	10.7095	0.143041	0.760758	9.29979	3.22178	18.8569	20.4055
2021-07-17	7-139	N7	0.5907	0.2508	0.034	0.011	1.1	2487	2480	4973	0.000643411	1.38282e-07	13.506	13.8099	0.0458417	0.977992	10.8129	3.75913	27.3159	24.0963
2021-07-17	7-140	N7	0.5426	0.2316	0.0307	0.0136	1.1	2437	2523	4989	0.000934197	3.90582e-07	13.3572	12.5372	0.0613876	1.0654	10.2916	3.75491	25.8945	23.0529
2021-07-17	7-141	N7	0.5486	0.2416	0.0429	0.0115	1.6	2506	2407	5014	0.00119701	2.85328e-07	14.4547	13.258	0.0714808	1.09026	10.62	3.87427	27.7128	23.7063
2021-07-17	7-143	N7	0.2853	0.1178	0.019	0.0056	1	2341	2414	4949	0.000831295	1.07241e-07	6.79603	7.54419	0.0836809	0.900829	7.28496	2.92542	14.3402	16.5931
2021-07-17	7-144	N7	0.6813	0.2899	0.0642	0.0271	2.2	2460	2404	4972	0.00069145	2.00203e-07	12.802	13.488	0.0418081	0.949143	10.1569	3.80593	26.29	22.4962
2021-07-17	7-145	N7	0.7264	0.3177	0.0653	0.0252	1.9	2475	2432	4988	0.000681093	2.2187e-07	14.3139	14.5892	0.0517111	0.981133	10.1897	4.19207	28.9031	22.9984
2021-07-17	7-146	N7	0.9123	0.396	0.0855	0.0267	2.3	2463	2373	4967	0.00118359	3.8964e-07	17.6907	16.5414	0.0386888	1.06948	11.3086	4.57797	34.2321	25.26
2021-07-17	7-147	N7	0.3841	0.1741	0.0291	0.0108	1.2	2570	2393	4985	0.00091307	3.72213e-07	8.09111	7.41888	0.0728903	1.09061	7.92835	3.12281	15.51	17.7014
2021-07-17	7-148	N7	0.5091	0.2246	0.0544	0.0207	1.7	2390	2388	4975	0.00344344	4.7971e-07	8.35335	11.7968	0.258466	0.708106	9.21056	3.44855	20.1501	20.3848
2021-07-17	7-149	N7	0.4913	0.206	0.0282	0.0187	1.2	2525	2383	4992	0.00174821	1.66217e-06	10.6512	12.3926	0.106435	0.85948	9.60508	3.64058	23.0438	21.3626
2021-07-17	7-150	N7	0.3826	0.1605	0.0308	0.0219	1.7	2509	2395	4959	0.000779783	1.66591e-07	8.78643	9.54962	0.0692957	0.920082	8.14609	3.3754	18.336	18.4675
2021-07-17	7-151	N7	0.854	0.3396	0.0574	0.0202	1.7	2512	2309	4993	0.00523477	4.21986e-06	14.7894	20.0241	0.19021	0.738584	11.2518	4.66291	34.8135	25.5681
2021-07-17	7-152	N7	0.5659	0.2357	0.0296	0.0117	1.2	2576	2394	4977	0.00511931	4.31249e-06	10.7303	15.8429	0.225772	0.677293	10.5334	3.79363	26.5731	23.4273
2021-07-17	7-153	N7	1.0646	0.4271	0.0781	0.021	1.9	2566	2377	4974	0.00112908	8.42887e-07	20.5127	21.466	0.0404723	0.955592	12.3688	5.02718	41.9787	28.2499
2021-07-17	7-154	N7	0.6607	0.2639	0.0664	0.0215	2	2461	2406	4991	0.0012023	4.11199e-07	16.2029	15.1427	0.0563536	1.07002	11.7075	4.01745	31.3457	25.5626
2021-07-17	7-155	N7	0.5247	0.2169	0.0359	0.0187	1.3	2490	2463	4979	0.000438373	1.26066e-07	12.7244	13.0696	0.0450233	0.973593	10.0272	3.8983	25.794	22.4148
2021-07-17	7-156	N7	0.4731	0.2072	0.0393	0.0124	1.8	2505	2463	4988	0.00276123	4.67e-07	9.43412	12.1954	0.192796	0.773583	9.60498	3.56677	21.6295	21.212
2021-07-17	7-157	N7	0.4244	0.1519	0.032	0.0148	1.5	2458	2350	4987	0.000573413	2.20863e-07	10.4803	10.1052	0.048897	1.03712	9.03013	3.40727	20.5854	20.1387
2021-07-17	7-158	N7	0.7501	0.3202	0.0862	0.0374	2.9	2471	2463	4992	0.000790282	1.99728e-07	15.7577	14.9678	0.0609291	1.05277	10.912	4.27907	30.7255	24.3
2021-07-17	7-159	N7	0.3397	0.1447	0.0226	0.0127	1.2	2448	2478	4984	0.00111491	2.0925e-07	5.87805	6.98668	0.150253	0.841322	7.58407	2.86414	12.8647	16.9281
2021-07-17	7-160	N7	0.6774	0.2876	0.0496	0.0195	1.9	2357	2596	4995	0.00107433	3.18138e-07	13.4405	12.391	0.0922397	1.0847	10.2411	3.97067	25.8315	22.9723
2021-07-17	7-161	N7	0.3648	0.1556	0.0293	0.0137	1.3	2468	2516	4992	0.000489434	7.58105e-08	7.13394	6.84071	0.0729679	1.04286	8.19333	2.91687	13.9746	17.9705
2021-07-17	7-162	N7	0.4024	0.1576	0.0251	0.011	1.2	2381	2443	4977	0.000585831	1.03017e-07	9.17863	9.66691	0.0568818	0.949489	7.94058	3.64532	18.8455	19.2215
2021-07-17	7-163	N7	0.6248	0.2739	0.0629	0.0279	2	2490	2447	4982	0.00398527	1.66219e-06	12.476	16.4548	0.189598	0.7582	10.7996	4.18124	28.9308	23.9312
2021-07-17	7-164	N7	0.4866	0.1951	0.0386	0.0235	1.7	2478	2452	4991	0.000354793	6.48818e-08	10.1577	10.4609	0.0541538	0.971015	9.08136	3.59576	20.6186	20.6205
2021-07-17	7-165	N7	0.5642	0.245	0.0421	0.015	1.5	2462	2402	4984	0.000216461	2.75354e-08	11.2369	11.1936	0.0250112	1.00387	9.70978	3.60787	22.4305	21.4161
2021-07-17	7-166	N7	0.6422	0.2618	0.0383	0.0166	1.3	2520	2441	4989	0.00131693	4.33883e-07	14.5707	13.2877	0.0616155	1.09656	10.7732	4.195	27.8584	24.3609
2021-07-17	7-167	N7	0.5899	0.2618	0.0484	0.0122	1.6	2374	2580	4985	0.00279198	1.31214e-06	10.058	12.7757	0.191518	0.78728	9.1409	3.77256	22.8337	20.6784
2021-07-17	7-168	N7	0.4469	0.1943	0.0342	0.0203	1.5	2505	2451	4988	0.00105236	3.60944e-07	10.9062	10.2666	0.0872712	1.0623	9.89255	3.3773	21.1727	21.4772
2021-07-17	7-169	N7	0.4576	0.1936	0.0434	0.0163	1.8	2505	2481	4986	0.000514233	5.87385e-08	10.9618	11.1625	0.0509858	0.982019	9.59934	3.56882	22.1244	21.1184
2021-07-17	7-170	N7	0.5258	0.2345	0.0493	0.0153	1.7	2520	2444	4984	0.00169602	1.06331e-06	10.7578	12.4538	0.0808357	0.863823	10.0961	3.53299	23.2116	22.0557
2021-07-17	7-171	N7	0.5439	0.2307	0.0565	0.0198	1.9	2466	2521	4994	0.000950829	5.73598e-07	12.503	13.2409	0.0635608	0.944275	10.2966	3.86839	25.7439	22.7202
2021-07-17	7-172	N7	0.5551	0.2877	0.0322	0.0205	1.3	2548	2370	4980	0.00054133	9.82877e-08	12.4045	12.8009	0.0449091	0.969027	9.50417	4.0454	25.2054	22.0207
2021-07-17	7-173	N7	0.6749	0.2598	0.0487	0.0108	1.6	2397	2483	4985	0.00147015	9.10528e-07	12.2115	13.6682	0.0620285	0.893423	10.2354	4.13969	25.8797	23.0563
2021-07-17	7-174	N7	0.3891	0.1569	0.0249	0.009	1.1	2505	2440	4974	0.00232971	1.00335e-06	10.378	8.15544	0.159385	1.27252	9.23977	3.29351	18.5334	20.6656
2021-07-17	7-175	N7	0.6124	0.2499	0.0444	0.0149	1.5	2505	2410	4991	0.000861725	4.97582e-07	13.6076	14.3303	0.0490446	0.949572	10.4076	4.02713	27.9379	23.3684
2021-07-17	7-176	N7	0.513	0.2006	0.0343	0.0127	1.2	2509	2436	4988	0.000476505	1.33502e-07	11.9059	11.8234	0.05378	1.00697	9.64128	3.67091	23.7293	21.5753
2021-07-17	7-177	N7	0.4832	0.2239	0.0271	0.0098	1	2532	2390	4960	0.00311498	1.09954e-06	7.89359	11.0069	0.232567	0.717147	8.94965	3.44339	18.9005	19.9187
2021-07-17	7-178	N7	0.5312	0.2153	0.0379	0.0134	1.4	2528	2443	4979	0.0023423	1.01793e-06	11.0283	13.3706	0.145074	0.824817	9.71601	3.85948	24.3989	21.8575
2021-07-17	7-180	N7	0.4921	0.2102	0.0279	0.013	1	2523	2397	4991	0.00258861	7.7969e-07	9.31578	11.9044	0.172289	0.78255	9.10205	3.60495	21.2202	20.4472
2021-07-17	7-181	N7	0.3504	0.133	0.0244	0.0106	1.1	2460	2396	4986	0.00127764	1.85753e-07	6.89964	8.17719	0.137229	0.843766	7.89745	2.95291	15.0768	17.4971
2021-07-17	7-182	N7	0.276	0.1212	0.0217	0.0082	1	2241	2174	4551	0.0010869	5.67117e-07	7.05005	6.09882	0.117353	1.15597	6.95565	2.81459	13.1489	15.7793
2021-07-17	7-183	N7	0.2757	0.1223	0.0199	0.0079	1.1	2241	2174	4551	0.0010869	5.67117e-07	7.05005	6.09882	0.117353	1.15597	6.95565	2.81459	13.1489	15.7793
2021-07-17	7-184	N7	0.8096	0.3529	0.0627	0.0253	1.9	2476	2445	4972	0.00136039	2.81302e-07	14.843	16.1473	0.0721601	0.919228	10.9526	4.20094	30.9903	24.3659
2021-07-17	7-185	N7	0.6206	0.2567	0.0551	0.0196	1.8	2493	2457	4984	0.00239081	1.36835e-06	12.5107	14.9015	0.115543	0.83956	10.5004	3.84753	27.4123	23.1132
2021-07-17	7-186	N7	0.6084	0.2655	0.0512	0.0206	1.7	2478	2466	4991	0.000837384	2.2782e-07	11.3809	12.2171	0.068959	0.931558	9.62765	3.74035	23.5981	21.331
2021-07-17	7-187	N7	0.821	0.343	0.0918	0.032	2.3	2488	2420	4987	0.00112951	4.87172e-07	16.1889	17.2161	0.0483806	0.94034	11.6512	4.2371	33.405	25.598
2021-07-17	7-188	N7	0.6121	0.2763	0.0577	0.0234	1.8	2508	2484	4979	0.00190281	5.06782e-07	10.0873	11.99	0.127673	0.841311	9.53607	3.47614	22.0774	21.0432
2021-07-17	7-189	N7	0.7443	0.3179	0.0647	0.0244	1.8	2438	2523	4972	0.000651498	1.54116e-07	15.0011	15.5877	0.0356995	0.962366	10.9857	4.23681	30.5888	24.3784
[truncated: 513 more rows]
[truncated: 1 more columns]

## Sheet: Metadata
Column name	Meaning
Date	Sampling date
Image	Individual leaf code
Group	Leaf-age group. O3 represents the leaves appearing in September 2020; N3 represents the leaves appearing in the first half of March 2021, which were sampled in mid March 2021; N4 represents the leaves appearing in the first half of March 2021, which were sampled in mid April 2021; N5 represents the leaves appearing in the first half of March 2021, which were sampled in mid May 2021; N6 represents…
LFM	Lamina fresh mass (g)
LDM	Lamina dry mass (g)
PFM	Leaf petiole fresh mass (g)
PDM	Leaf petiole dry mass (g)
PL	Leaf peitole length (cm)
n1	The number of data points on the edge of the left side of a leaf lamina
n2	The number of data points on the edge of the right side of a leaf lamina
n	The number of data points on the edge of a leaf
Mean	The mean of the differences in areas between the upper and lower intersectons between the lamina and the 1000 equidistant strips from the lamina base to lamina apex
Var	The variance of the differences in areas between the upper and lower intersectons between the lamina and the 1000 equidistant strips from the lamina base to lamina apex
upper.area	The area of the left side of a leaf lamina (cm2)
lower.area	The area of the right side of a leaf lamina (cm2)
SI	The standardized index for lamina bilateral asymmetry
AR	Area ratio of the left side to the right side of a leaf lamina
scan.length	Lamina length (cm)
scan.width	Lamina maximum width (cm)
scan.area	Lamina area (cm2) = upper.area + lower.area
scan.perimeter	Lamina perimeter (cm)
